# Systems-Based Approaches to Probing Metabolic Variation within the *Mycobacterium tuberculosis* Complex

Emma K. Lofthouse<sup>1,2</sup>, Paul R. Wheeler<sup>1</sup>, Dany J. V. Beste<sup>2</sup>, Bhagwati L. Khatri<sup>1</sup>, Huihai Wu<sup>2</sup>, Tom A. Mendum<sup>2</sup>, Andrzej M. Kierzek<sup>2</sup>, John Joe McFadden<sup>2\*</sup>

<sup>1</sup> Animal Health and Veterinary Laboratories Agency (Weybridge), Department for Bovine Tuberculosis, New Haw, Surrey, United Kingdom, <sup>2</sup> Department of Microbial and Cellular Sciences, Faculty of Health and Medical Sciences, University of Surrey, Stag Hill, Guildford, Surrey, United Kingdom

## Abstract

The *Mycobacterium tuberculosis* complex includes bovine and human strains of the tuberculosis bacillus, including *Mycobacterium tuberculosis*, *Mycobacterium bovis* and the *Mycobacterium bovis* BCG vaccine strain. *M. bovis* has evolved from a *M. tuberculosis*-like ancestor and is the ancestor of the BCG vaccine. The pathogens demonstrate distinct differences in virulence, host range and metabolism, but the role of metabolic differences in pathogenicity is poorly understood. Systems biology approaches have been used to investigate the metabolism of *M. tuberculosis*, but not to probe differences between tuberculosis strains. In this study genome scale metabolic networks of *M. bovis* and *M. bovis* BCG were constructed and interrogated, along with a *M. tuberculosis* network, to predict substrate utilisation, gene essentiality and growth rates. The models correctly predicted 87–88% of high-throughput phenotype data, 75–76% of gene essentiality data and *in silico*-predicted growth rates matched measured rates. However, analysis of the metabolic networks identified discrepancies between *in silico* predictions and *in vitro* data, highlighting areas of incomplete metabolic knowledge. Additional experimental studies carried out to probe these inconsistencies revealed novel insights into the metabolism of these strains. For instance, that the reduction in metabolic capability observed in bovine tuberculosis strains, as compared to *M. tuberculosis*, is not reflected by current genetic or enzymatic knowledge. Hence, the *in silico* networks not only successfully simulate many aspects of the growth and physiology of these mycobacteria, but also provide an invaluable tool for future metabolic studies.

**Citation:** Lofthouse EK, Wheeler PR, Beste DJV, Khatri BL, Wu H, et al. (2013) Systems-Based Approaches to Probing Metabolic Variation within the *Mycobacterium tuberculosis* Complex. PLoS ONE 8(9): e75913. doi:10.1371/journal.pone.0075913

**Editor:** Stephen V. Gordon, University College Dublin, Ireland

**Received:** May 9, 2013; **Accepted:** August 16, 2013; **Published:** September 17, 2013

**Copyright:** © 2013 Lofthouse et al. This is an open-access article distributed under the terms of the Creative Commons Attribution License, which permits unrestricted use, distribution, and reproduction in any medium, provided the original author and source are credited.

**Funding:** This work was supported by the Animal Health and Veterinary Laboratories Agency (AHVLA) studentship fund (project SC1003, <http://www.defra.gov.uk/ahvla-en/>); AHVLA Seedcorn programme (project SC0205, <http://www.defra.gov.uk/ahvla-en/>); and the Wellcome Trust (grant reference number 088677, [www.wellcome.ac.uk](http://www.wellcome.ac.uk)). The funders had no role in study design, data collection and analysis, decision to publish, or preparation of the manuscript.

**Competing interests:** The authors have declared that no competing interests exist.

\* E-mail: [j.mcfadden@surrey.ac.uk](mailto:j.mcfadden@surrey.ac.uk)

## Introduction

The pathogenic microorganisms constituting the *Mycobacterium tuberculosis* complex are associated with important human and animal diseases. *M. bovis* is the causative agent of bovine tuberculosis, a chronic and occasionally fatal infectious disease primarily infecting cattle and other livestock; but is capable of infecting a wide range of mammals and other vertebrates, including humans [1,2]. Bovine tuberculosis causes immense economic loss in many countries, either from loss of livestock, disease testing, or compensation. Worldwide, agricultural losses are estimated to be around \$3 billion a year [3]. *M. bovis* is very closely related to *M. tuberculosis*, a virulent tubercle bacillus estimated to infect a third of the world's population and cause the deaths of 1.4 million people each year [4]. In an attempt to prevent tuberculosis infections more than 3 billion individuals [5] have

been immunised with *M. bovis* BCG, a live attenuated derivative of *M. bovis*.

*M. tuberculosis*, *M. bovis* and *M. bovis* BCG are characterised by 99.9% similarity at the nucleotide level [3,5,6]. However, the genetic deletions, rearrangements and duplications that *M. bovis* and *M. bovis* BCG have undergone relative to *M. tuberculosis* results in widely differing host tropisms, phenotypes and pathogenicity [2,3,5–9]. Whilst large deletions, such as the regions of difference identified in *M. bovis* and *M. bovis* BCG, have been shown to encode virulence factors and result in attenuation of infection [9–12], the genetic basis of these profound variations are mostly undefined. Defining the metabolic differences between the three species is of particular importance as metabolic adaptation to the host environment has been highlighted as a key component of the pathogenic strategy of *M. tuberculosis* [13–17] and is also likely to be important for the virulence of *M. bovis*.

Previous targeted studies have identified the genetic basis of some observed metabolic differences, for example, the inability of *M. bovis* to generate energy from glycolytic intermediates [3,18,19]. This defect is thought to be due to the inactivation of pyruvate kinase which causes a disconnection in central metabolism between glycolysis and the Tricarboxylic acid cycle (TCA cycle) [18,19]. However, although there have been focused investigations into the metabolic differences between the human and bovine tubercle bacillus, systems level comparisons of metabolism have not yet been undertaken.

A systems biology approach provides very effective methods for studying metabolism. Genome scale metabolic reaction networks incorporate all known biochemical reactions within a cell and represent a global system where reaction pathways are defined within the context of whole-cell metabolism. These networks are able to predict phenotypic behaviour, aid in hypothesis generation, identify missing reactions and provide information on the robustness of the metabolic networks, which can be used to identify vulnerable pathways that may be targeted with novel drugs. The creation of *M. tuberculosis* genome scale reaction networks [20-23] has provided a mechanism to study its metabolism in a systemic manner and a basis for the modelling and metabolic comparison of *M. bovis* and *M. bovis* BCG strains.

In this study we present the first genome scale metabolic networks for *M. bovis* and *M. bovis* BCG, along with a phenotypic analysis of *M. tuberculosis*, *M. bovis* and *M. bovis* BCG. The networks are freely available in the Supporting Information (Tables S1-S3; Models S1-S3) and online for use with our interactive software (<http://sysbio.sbs.surrey.ac.uk/>) [24]. To our knowledge this is the first time the metabolism of a pathogen and its vaccine strain have been compared on a systems level and any identified differences have the potential to aid investigations into causes of *M. bovis* BCG attenuation and the suitability of novel vaccines. The models qualitatively predict phenotype data with between 87-88% agreement, gene knockout results with 75-76% accuracy, and quantitative assessment of measured carbon uptake rates as a function of growth rate show that *in silico* growth rates are comparable to *in vitro* results. Therefore, these reaction networks successfully simulate many aspects of mycobacterial metabolism and can be used to examine the metabolic differences between these strains.

## Materials and Methods

### Bacterial strains and growth conditions

*M. tuberculosis* H37Rv, *M. bovis* AF2122/97 and *M. bovis* BCG Pasteur were used for this study. Frozen stocks were maintained in 10% (vol/vol) glycerol at  $-80^{\circ}\text{C}$ . Middlebrook 7H9 broth containing 5% (vol/vol) albumin-dextrose-catalase enrichment medium supplement (ADC) (Becton Dickinson), 2 g/L pyruvate and 0.05% (vol/vol) Tween 80 was used to grow cultures from frozen stocks at  $37^{\circ}\text{C}$ , either statically or rolling. Brain heart infusion agar was used to assess culture purity (Becton Dickinson).

For the Roisin's agar experiments cultures were grown until late exponential phase ( $\text{OD}_{600} = 1.0$ ) in 7H9 containing ADC,

pyruvate and Tween 80 (as described), washed twice with Ringer's solution with 0.2% (vol/vol) tyloxopol and plated in triplicate onto Roisin's agar containing sole carbon and nitrogen sources. When testing sole carbon source assimilation, cells were grown on Roisin's minimal media [25] with 10 g/L agarose containing sole carbon sources at 5 g/L (2-oxoglutarate, L-alanine, D-arabinose, L-arginine, L-asparagine, L-aspartic acid, citrate, D-fructose, fumarate, D-galactose, D-glucose, L-glutamate, L-glutamine, glycerol, glycine, L-histidine, L-isoleucine, D-lactose, L-leucine, L-lysine, malate, D-maltose, D-mannose, L-methionine, L-phenylalanine, L-proline, propanoate, D-raffinose, D-rhamnose, D-ribose, L-serine, D-serine, succinate, D-sucrose, L-threonine, D-trehalose, L-valine, D-xylose). When testing sole nitrogen source assimilation Roisin's minimal media was used with 5 g/L pyruvate, 10 g/L agarose and 5.9 g/L sole nitrogen source (L-alanine, ammonia, L-arginine, L-asparagine, L-aspartic acid, L-cysteine, L-glutamate, L-glutamine, glycine, L-histidine, L-isoleucine, L-leucine, L-lysine, L-methionine, L-phenylalanine, L-proline, L-serine, D-serine, L-threonine, L-tryptophan, L-tyrosine, urea, L-valine). Plates were incubated for up to 12 weeks. To test for any mutations which may have given false results any positives after 6 weeks were independently tested a further two times.

For growth curves inoculum cultures of *M. bovis* were grown statically until late exponential phase ( $\text{OD}_{600} = 1.0$ ) in Roisin's minimal media with 5 g/L pyruvate and 0.2% (vol/vol) tyloxopol. Using a 1% inoculum 100 ml rolling (2 rpm) cultures were set up in Roisin's minimal media with 5 g/L D-glucose, 0.2% (vol/vol) Tween 80 or 5 g/L D-glucose and 0.2% (vol/vol) Tween 80 as carbon sources. A Biomate, ThermoSpectronic spectrophotometer was used to take daily OD readings until they started to fall, presumably due to bacterial death.

### Construction of GSMN-MB and BCG

The first *M. tuberculosis* genome scale metabolic network [20] (GSMN-TB) (Table S1; Model S1) created for the H37Rv strain formed the basis for the reconstruction of *M. bovis* AF2122/97 (GSMN-MB) (Table S2; Model S2) and *M. bovis* BCG Pasteur (GSMN-BCG) (Table S3; Model S3). Genolist [26] was used to assign respective *M. bovis* and *M. bovis* BCG gene numbers to the genes present in GSMN-TB and alter annotations which since the GSMN-TB was published have been assigned with an alternative enzymatic function. Using data compiled by Genolist [26] any mutations between *M. tuberculosis*, *M. bovis* and *M. bovis* BCG leading to changes in protein sequence were identified. Published scientific literature was used to investigate these genes and to identify metabolic differences not caused by DNA mutations within enzyme sequences. This information was used to alter the networks to reflect *M. bovis* or *M. bovis* BCG metabolism (Table S4).

### Biolog phenotype data

Biolog Phenotype MicroArray [27] experiments which examined the ability of *M. tuberculosis* H37Rv and *M. bovis* AF2122/97 to respire in the presence of 190 carbon and 95 nitrogen sources (PM1, 2a, 3b [27]), were obtained from Khatri, B et al. 2013 [8]. Equivalent experiments for *M. bovis* BCG

were carried out using the described method [8]. Three to four biological replicates were performed for each plate and a cell free control plate was also included to test for abiotic dye reduction. The raw data was analysed using OmniLog PM kinetic plot software [27], with final colour intensity values and manual analysis of kinetic curves used to assess respiration. Wells were considered positive if the final colour intensity value minus the negative control and minus the standard deviation of the negative controls was a positive value [28]. Results were verified by analysing the kinetic curves. Substrates considered to be respired had at least 50% of duplicate wells showing a positive result. The confidence levels applied to the data were determined by the number of concordant results for each biological replicate [28]. High, medium and low confidence results were categorised as substrates where 100%, >75% and >50% of replicates produced the same result.

### Modelling of phenotype experiments

The composition of Biolog base medium [27] is not published, however, the mycobacteria were not able to respire in this medium without the added carbon or nitrogen source. To model the carbon source experiment we therefore simulated the media as a modified form of Roisin's minimal media [25] containing unlimited quantities of ammonia, phosphate, iron, sulfate, carbon dioxide and a Biolog carbon source influx of 1 mmol/g DWt/h. Similarly the nitrogen source experiment was simulated using a modified form of Roisin's media, where ammonia was replaced with 1 mmol/g DWt/h of the Biolog nitrogen source and pyruvate was used as a carbon source (influx at 1 mmol/g DWt/h). Flux balance analysis (FBA) was performed under aerobic conditions using biomass as the objective function.

### Radioactive glucose uptake in *M. bovis* AF2122/97 and *M. tuberculosis* H37Rv

Cultures of *M. tuberculosis* and *M. bovis* were grown until exponential phase ( $OD_{600}$  0.6-0.8) in Roisin's minimal media with 5 g/L pyruvate and 0.2% (vol/vol) tyloxapol, washed twice and then resuspended in Roisin's media (no carbon, tyloxapol). 1 ml of culture was added to a universal tube containing 3700 becquerels of [6- $^{14}$ C] D-glucose and 1 ml of 1 M sodium hydroxide and incubated for 4 h at 37°C. Samples were carried out in triplicate with negative controls (identically prepared heat killed suspensions) tested in parallel. Samples were filtered through Whatman GFC glass microfibre filters, washed 3 times with 0.025% (vol/vol) tyloxapol and placed in scintillation tubes with 250  $\mu$ l of 70% ethanol and 5 ml of BDH Scintiran Fluoran flow scintillation fluid. The sodium hydroxide was directly added to the scintillation fluid. Radioactivity was counted using a Packman tri-carb liquid scintillation counter and dpm calculated from a quench curve. Dpm for negative controls were subtracted from dpm for the live samples before the mean average uptake was calculated. For the analysis of [6- $^{14}$ C] D-glucose radioactivity incorporation in *M. bovis* when both [6- $^{14}$ C] D-glucose and non-radiolabelled Tween 80 were available as carbon sources, the experiment carried out as described above, except that the incubation medium was supplemented with 0.2% (vol/vol) Tween 80.

### Modelling of growth rate experiments

To model *in vitro* growth rate experiments in GSMN-BCG and TB the media was simulated as a modified form of Roisin's minimal media (see modelling of phenotype experiments) with carbon sources constrained to experimentally derived values [29] and the biomass composition for slow or fast growth used as the objective function.

### Gene essentiality predictions and comparison with TRASH and deep sequencing data

The maximal theoretical growth rate of each *in silico* gene knock out was calculated by removing single genes from the network and performing FBA linear programming as described in Beste et al., 2007 [20]. The computational predictions were compared to the gene essentiality findings of Transposon site hybridization (TraSH) mutagenesis [30] and deep sequencing [31] experiments.

## Results

### The genome-scale metabolic networks of *M. bovis* and *M. bovis* BCG

The genome scale metabolic network of *M. tuberculosis*, GSMN-TB [20], (Table S1; Model S1) was used as a starting point for the reconstruction of the genome scale networks of *M. bovis* (Table S2; Model S2) and *M. bovis* BCG (Table S3; Model S3). Reactions were adapted to reflect *M. bovis* and *M. bovis* BCG reactions based on genome annotations, protein sequences and published biochemical data [3,5,6,18,26,32-49] (Table S4). For orthologous genes GSMN-TB gene assignments were changed to *M. bovis* and *M. bovis* BCG gene numbers, with each DNA sequence analysed for changes relative to *M. tuberculosis*. The analysis identified 228 and 204 genes with non-synonymous sequence differences in *M. bovis* and *M. bovis* BCG and these genes catalysed approximately 30% of reactions within each network. Only a small proportion (~19%) of sequence differences were predicted to lead to metabolic differences requiring network modifications, the vast majority of which were the removal of genes and reactions (Table 1). For GSMN-MB 42 genes and 14 reactions were deleted from the original GSMN-TB network, whilst slightly fewer genes (40) and more reactions (16) were deleted from the GSMN-BCG. These alterations appear to support the theory that *M. bovis* has evolved from a progenitor of the *M. tuberculosis* complex and that *M. tuberculosis* is more closely related to this common ancestor [50].

The constructed metabolic networks for both *M. bovis* and *M. bovis* BCG (Table 2) therefore contain fewer reactions, metabolites and genes than an updated GSMN-TB network, GSMN-TB 1.1. GSMN-TB 1.1 includes some corrections to the original GSMN-TB, plus additional pathways, such as cholesterol metabolism, that were not implemented in the earlier published version [20]. Due to the reduction in genes within the networks the *M. bovis* and *M. bovis* BCG models have a slightly higher fraction of essential genes (31% and 30% respectively; Tables S5 and S6) compared to GSMN-TB 1.1 (29%; Table S7). These values are slightly lower than the predicted value of 35% essential genes in the entire *M.*

**Table 1.** Changes to the GSMN-TB network to create GSMN-MB and GSMN-BCG.

| Gene                                                       | GSMN-TB | GSMN-MB | GSMN-BCG |
|------------------------------------------------------------|---------|---------|----------|
| Glycerol kinase ( <i>glpK</i> )                            | 1       | -       | 1        |
| Glycerol-3-phosphate dehydrogenase ( <i>glpD</i> )         | 2       | 2       | 3        |
| GDP-D-rhamnose biosynthesis ( <i>gca</i> , <i>gmdA</i> )   | 2       | 1       | 1        |
| GDP-4-dehydro-6-deoxy-D-mannose epimerase                  | 1       | 0       | 0        |
| UTP-hexose-1-phosphate uridylyltransferase ( <i>galT</i> ) | 2       | 1       | 1        |
| $\beta$ -glucosidase ( <i>bgIS</i> )                       | 1       | -       | -        |
| Pyruvate kinase ( <i>pykA</i> )                            | 1       | -       | 1        |
| Isocitrate lyase ( <i>icl</i> )                            | 1       | 2       | 2        |
| (S)-2-hydroxy-acid oxidase                                 | 1       | -       | -        |
| Nitrate reductase ( <i>nar</i> )                           | 5       | -       | -        |
| Fumarate reductase ( <i>frd</i> )                          | 8       | 7       | 7        |
| Glycine dehydrogenase ( <i>gcvB</i> )                      | <=>     | =>      | =>       |
| L-serine ammonia-lyase ( <i>sdaA</i> )                     | 1       | 1       | -        |
| Alanine dehydrogenase ( <i>ald</i> )                       | 1       | -       | -        |
| Nicotinamidase                                             | 1       | -       | -        |
| Precorrin-6Y C5,15-methyltransferase                       | 1       | -       | -        |
| Molybdopterin biosynthesis protein ( <i>moaE</i> )         | 3       | -       | -        |
| enoyl-CoA hydratase/isomerases ( <i>echA</i> )             | 21      | 21      | 21       |
| Phospholipases                                             | 28      | 23      | 23       |
| Methoxy mycolic acid synthase ( <i>mmaA3</i> )             | 1       | 1       | -        |
| Synthesis of methoxy mycolic acids                         | Biomass | Biomass |          |
| Polyketide synthase ( <i>pkS15/1</i> )                     | -       | 1       | 1        |
| Glycosyltransferases                                       | 2       | -       | -        |
| Sulfotransferases                                          | 3       | 2       | 3        |
| Sulfolipid-1 synthesis                                     | 1       | -       | -        |
| Mas-like gene ( <i>msl3</i> , <i>msl4</i> , <i>msl5</i> )  | 4       | 3       | 3        |
| Nitrate transporter ( <i>narK2</i> )                       | 1       | -       | -        |
| Phosphate transport via ABC system                         | 8       | -       | -        |
| Glycerol-3-phosphate antiporter ( <i>ugp</i> )             | 4       | -       | -        |
| Sulfolipid-1                                               | Biomass |         |          |
| Mycoside b                                                 |         | Biomass | Biomass  |
| Triacylglycerol synthases                                  | 15      | 14      | 14       |

Numerical value Number of genes catalysing the reaction; - indicates reaction is deleted from the network; 0 indicates an orphan reaction

=> Irreversible reaction

<=> Reversible reaction

Biomass Required for Biomass production

doi: 10.1371/journal.pone.0075913.t001

**Table 2.** Statistics of the mycobacterial reaction networks.

| Reaction Class              | Reaction network |         |          |
|-----------------------------|------------------|---------|----------|
|                             | GSMN-TB 1.1      | GSMN-MB | GSMN-BCG |
| Total number of reactions   | 876              | 863     | 861      |
| Cytosolic reactions         | 745              | 735     | 733      |
| Transport reactions         | 131              | 128     | 128      |
| Genes                       | 759              | 718     | 720      |
| Orphan reactions            | 198              | 200     | 200      |
| Total number of metabolites | 766              | 757     | 754      |
| Internal metabolites        | 667              | 660     | 657      |
| External metabolites        | 99               | 97      | 97       |

doi: 10.1371/journal.pone.0075913.t002

*tuberculosis* genome but within the 95% confidence interval (28-41%) [51]. All three GSMN networks are available in the Supporting Information (Tables S1-S3; Models S1-3) and online for use with our interactive software (<http://sysbio.sbs.surrey.ac.uk/>) [24].

Although the GSMN-MB and BCG models gave very similar predictions to the GSMN-TB 1.1, some interesting differences between *in silico* predictions and published experimental data [3,18,19,33,44] were found. GSMN-MB was able to utilise carbohydrates such as glucose *in silico*, although *in vitro* *M. bovis* is actually unable to grow on these substrates [18,19] (discussed further below). Another area where *in silico* predictions did not accord with experimental data was in amino acid synthesis. In *M. tuberculosis*, alanine dehydrogenase catalyses the oxidative deamination of L-alanine or, in the reverse direction, the reductive amination of pyruvate to yield alanine, but this activity is lost [33,44] in *M. bovis* and *M. bovis* BCG due to a frameshift caused by single base pair deletion [3]. Deletion of alanine dehydrogenase from the bovine networks resulted in a non-feasible network (no growth) unless L-alanine was supplied as a substrate, since this is the only biosynthetic route leading to L-alanine in the network. Yet, in contrast to the predictions *M. bovis* and *M. bovis* BCG are not alanine auxotrophs. Alanine dehydrogenase knockout mutants of *M. tuberculosis* are also not alanine autotrophs [19] and <sup>13</sup>C labelling experiments detected identical alanine labelling patterns [29] for *M. tuberculosis* and *M. bovis* BCG; indicating that an alternative pathway for alanine synthesis must be active in all three strains. To preserve alanine prototrophy, the alanine dehydrogenase reaction has therefore been retained in the GSMN-MB and BCG models as an irreversible orphan reaction [19,33,44].

### Validation of the model by comparison with Biolog phenotype data

The Biolog [27] high throughput phenotyping system was utilised to obtain additional insight into metabolic capability of *M. bovis* and *M. bovis* BCG and to further test the predictive accuracy of the GSMN-MB and GSMN-BCG networks. For comparison, we also examined *M. tuberculosis*. Biolog [27] is a commercially available phenotype microarraying platform that is capable of high-throughput screening for the ability to utilise

a large number of substrates. It employs the reduction of tetrazolium dye by NADH as a reporter system for measuring respiration [27]. Respiration is of course different from growth, as predicted by the network models; but our working assumption was that some degree of growth has to occur to reduce the respiratory substrate sufficiently to see a positive reaction.

Carbon substrate utilisation for *M. tuberculosis*, *M. bovis* and *M. bovis* BCG is presented in Table 3 (showing only substrates metabolised by at least one strain). Of the 190 carbon sources tested (Tables S8-S10) 33 substrates were metabolised by at least one of the mycobacteria tested, with 17 utilised by all three. These substrates included amino acids, TCA cycle intermediates, sorbitan derivatives, 3 carbon compounds and hexose or hexose containing carbohydrates. *M. tuberculosis* was able to respire more of these substrates (27) than *M. bovis* (25) or *M. bovis* BCG (22). Of the 95 nitrogen sources tested (Tables S11-S13) only 13 were able to be utilised as sole nitrogen sources (Table 4) by at least one of the three strains and these were mainly amino acids. Unlike carbon source data, the number of nitrogen sources utilised was similar between the three species.

Analysis of *in silico* predictions versus Biolog data showed that all three networks qualitatively predicted the Biolog data with a similar overall accuracy. For GSMN-TB 1.1, GSMN-MB and GSMN-BCG simulations 84%, 81% and 84% of substrates matched Biolog results respectively (Tables S8-S13). Substrate analysis identified results that appeared anomalous with previous studies [18,19,33,44,52]. For instance, *M. bovis* tested positive for glucose and glycerol respiration, however, as mentioned above, *M. bovis* is unable to utilise carbohydrates including glucose and glycerol as sole carbon sources [18,19]. Similarly, many *in silico* predictions for amino acid utilisation did not correlate with experimental data [33,44,52]. To independently probe the discordant results *M. tuberculosis*, *M. bovis* and *M. bovis* BCG were grown on minimal Roisin's agar media containing sole carbon or nitrogen sources.

Overall (Tables S8-S13) *in vitro* experiments using Roisin's agar media resolved many of the inconsistencies between *in silico* predictions and the Biolog data. For instance, in accordance with expectations, *M. bovis* was unable to grow on either glucose or glycerol when provided as the sole carbon source in Roisin's agar. The anomalous positive Biolog results may be due to the small amount of Tween 80 present in the Biolog base media. It has been shown previously [8,53], and confirmed here (see below), that Tween 80 and glucose are used synergistically for growth by *M. bovis* strains.

When the anomalous Biolog results were corrected using Roisin's agar data the GSMN-MB model accurately predicts 87% of phenotypes studied, whilst the GSMN-BCG predicts 88% correctly. The GSMN-TB 1.1 is slightly more accurate (91%) at simulating cellular phenotypes than the bovine networks due to false positive *in silico* growth predictions for *M. bovis* and *M. bovis* BCG. In this analysis results generated on Roisin's agar media were used instead of Biolog results when the outcomes differed because growth on agar plates assesses biomass production rather than respiration. Therefore, growth

**Table 5.** Glucose uptake experiments in *M. bovis* and *M. tuberculosis*

| Carbon substrates                           | Becquerels per mg dry weight |                 | Growth rates on non-radiolabelled substrates |                     |                 |
|---------------------------------------------|------------------------------|-----------------|----------------------------------------------|---------------------|-----------------|
|                                             | <i>M. tuberculosis</i>       | <i>M. bovis</i> | CO <sub>2</sub> evolved                      | Maximum growth rate | Maximum OD      |
| [6- <sup>14</sup> C] D-glucose              | 56.6 +/- 3.2                 | 3.5 +/- 0.9     | 1.0 +/- 0.2                                  | -                   | 0.015 +/- 0.004 |
| Tween 80                                    | N/A                          | N/A             | N/A                                          | 0.007 +/- 0.001     | 0.545 +/- 0.044 |
| [6- <sup>14</sup> C] D-glucose and Tween 80 | N/A                          | 8.7 +/- 0.7     | 1.0 +/- 0.3                                  | 0.013 +/- 0.001     | 1.171 +/- 0.066 |

doi: 10.1371/journal.pone.0075913.t005

on Roisin's agar media more accurately tests *in silico* predictions of growth than Biolog experiments.

### Analysis of glucose metabolism

GSMN-MB incorrectly predicts that *M. bovis* should grow on glucose as a sole carbon source. *In silico*, glucose enters the central metabolism of *M. bovis* via the glycolytic pathway and bypasses the blocked pyruvate kinase connection between glycolysis and the TCA cycle via either the anaplerotic/gluconeogenic enzyme, phosphoenolpyruvate carboxykinase, that interconverts phosphoenolpyruvate (glycolytic intermediate) and oxaloacetate (TCA cycle intermediate) or a serine-glycine pathway (phosphoglycerate dehydrogenase, phosphoserine transaminase, phosphoserine phosphatase, glycine hydroxymethyltransferase and glycine dehydrogenase (Figure 1)). The hypothesis is that a second metabolic or regulatory defect in glucose metabolism contributes to the *M. bovis* glucose phenotype, in addition to the inactive pyruvate kinase [18,19].

To further explore *M. bovis* glucose metabolism, *M. bovis* and *M. tuberculosis* were incubated with [6-<sup>14</sup>C] D-glucose as the only available carbon source for four hours. *M. bovis* could uptake a small amount of the labeled glucose but the rate was 16-fold less than *M. tuberculosis*, consistent with a defect in glucose uptake (Table 5). Interestingly, supplementation of the glucose media with Tween 80 significantly stimulated glucose uptake by *M. bovis* (2.5 times). However, the fate of this additional glucose was not oxidation to carbon dioxide as the amount of <sup>14</sup>C-CO<sub>2</sub> generated was unchanged by the Tween 80 supplementation. Maximum growth rates and OD<sub>600</sub> achieved on these substrates also indicated synergistic interaction [8] as growth of *M. bovis* on Roisin's media with glucose and Tween 80 exceeded that achieved with either compound alone (Table 5).

**Table 3.** Carbon substrates utilised by *M. tuberculosis*, *M. bovis* and *M. bovis* BCG.

| Substrates             | <i>M. tuberculosis</i> |               |                  | <i>M. bovis</i> |               |                  | <i>M. bovis</i> BCG |               |                  |
|------------------------|------------------------|---------------|------------------|-----------------|---------------|------------------|---------------------|---------------|------------------|
|                        | Biolog                 | Roisin's agar | <i>in silico</i> | Biolog          | Roisin's agar | <i>in silico</i> | Biolog              | Roisin's agar | <i>in silico</i> |
| 2-oxoglutarate         | C                      | C             | C                | -               | C>            | C                | -                   | C             | C                |
| Acetate                | C                      | C             | C                | C               | C             | C                | C                   | C             | C                |
| Acetoacetic acid       | C                      | NT            | -                | C               | NT            | -                | C                   | NT            | -                |
| Adenosine              | -                      | NT            | C                | -               | NT            | C                | C                   | NT            | C                |
| D-alanine              | C                      | NT            | C                | -               | NT            | -                | -                   | NT            | -                |
| L-alanine              | C                      | C             | C                | -               | -             | -                | -                   | -             | -                |
| L-asparagine           | C                      | C             | C                | -               | C             | C                | C                   | C             | C                |
| Butyric acid           | C                      | NT            | -                | C               | NT            | -                | C                   | NT            | -                |
| Caproic acid           | C                      | NT            | C                | C               | NT            | C                | C                   | NT            | C                |
| Citrate                | C                      | C             | C                | C               | C             | C                | C                   | C             | C                |
| D-fructose-6-phosphate | C                      | NT            | C                | C               | NT            | C                | -                   | NT            | C                |
| D-glucose-6-phosphate  | C                      | NT            | C                | -               | NT            | C                | C                   | NT            | C                |
| D-glucose              | C                      | C             | C                | C               | -             | C                | -                   | C             | C                |
| L-glutamate            | C                      | C             | C                | C               | C             | C                | C                   | C             | C                |
| L-glutamine            | C                      | C             | C                | -               | C             | C                | -                   | C             | C                |
| Glycerol               | C                      | C             | C                | C               | -             | C                | C                   | C             | C                |
| Glycine                | C                      | C             | C                | -               | C             | C                | -                   | C             | C                |
| L-lactate              | C                      | NT            | C                | C               | NT            | C                | C                   | NT            | C                |
| D-malic acid           | -                      | NT            | C                | C               | NT            | C                | C                   | NT            | C                |
| L-malic acid           | C                      | C             | C                | C               | C             | C                | C                   | C             | C                |
| D-mannose              | -                      | C             | C                | C               | C             | C                | -                   | C             | C                |
| Methyl-pyruvate        | C                      | NT            | -                | C               | NT            | -                | C                   | NT            | -                |
| Mono methyl-succinate  | C                      | NT            | -                | C               | NT            | -                | C                   | NT            | -                |
| N-acetyl-glucosamine   | -                      | NT            | -                | C               | NT            | -                | -                   | NT            | -                |
| Oxalomalic acid        | C                      | NT            | -                | C               | NT            | -                | C                   | NT            | -                |
| Propanoate             | -                      | C             | C                | C               | C             | C                | C                   | C             | C                |
| Pyruvate               | C                      | C             | C                | C               | C             | C                | C                   | C             | C                |
| D-serine               | C                      | -             | -                | C               | -             | -                | -                   | -             | -                |
| D-tagatose             | -                      | NT            | -                | C               | NT            | -                | -                   | NT            | -                |
| D-trehalose            | C                      | C             | C                | C               | C             | C                | C                   | C             | C                |
| Tween 20               | C                      | NT            | C                | C               | NT            | C                | C                   | NT            | C                |
| Tween 40               | C                      | NT            | C                | C               | NT            | C                | C                   | NT            | C                |
| Tween 80               | C                      | C             | C                | C               | C             | C                | C                   | C             | C                |

**Table 3 (continued).**

C Utilised as a carbon substrate  
 - Not utilised as a carbon substrate  
 NT Not tested

doi: 10.1371/journal.pone.0075913.t003

**Table 4. Nitrogen substrates utilised by *M. tuberculosis*, *M. bovis* and *M. bovis* BCG.**

| Substrate       | <i>M. tuberculosis</i> |               |                  | <i>M. bovis</i> |               |                  | <i>M. bovis</i> BCG |               |                  |
|-----------------|------------------------|---------------|------------------|-----------------|---------------|------------------|---------------------|---------------|------------------|
|                 | Biolog                 | Roisin's agar | <i>in silico</i> | Biolog          | Roisin's agar | <i>in silico</i> | Biolog              | Roisin's agar | <i>in silico</i> |
| L-Alanine       | N                      | N             | N                | -               | -             | -                | -                   | -             | -                |
| Allantoin       | -                      | NT            | -                | N               | NT            | -                | -                   | NT            | -                |
| L-Asparagine    | N                      | N             | N                | N               | N             | N                | N                   | N             | N                |
| L-Aspartic Acid | -                      | N             | N                | -               | N             | N                | N                   | N             | N                |
| L-Cysteine      | N                      | -             | -                | N               | N             | -                | N                   | -             | -                |
| D-Galactosamine | N                      | NT            | -                | N               | NT            | -                | N                   | NT            | -                |
| D-Glucosamine   | -                      | NT            | -                | N               | NT            | -                | -                   | NT            | -                |
| L-Glutamic Acid | N                      | N             | N                | N               | N             | N                | N                   | N             | N                |
| L-Glutamine     | N                      | N             | N                | N               | N             | N                | N                   | N             | N                |
| L-Ornithine     | N                      | NT            | -                | N               | NT            | -                | N                   | NT            | -                |
| D-Serine        | N                      | -             | -                | N               | -             | -                | N                   | -             | -                |
| L-Serine        | N                      | N             | N                | N               | N             | N                | -                   | -             | N                |
| L-Threonine     | -                      | N             | N                | -               | -             | N                | N                   | -             | N                |

N Utilised as a nitrogen substrate  
 - Not utilised as a nitrogen substrate  
 NT Not tested

doi: 10.1371/journal.pone.0075913.t004

### Analysis of amino acid metabolism

Biolog data and *in silico* predictions were notably different for the utilisation of amino acids as sole carbon or nitrogen sources (Table 6) as the models predicted a greater metabolic potential than was actually demonstrated experimentally. Many of these discrepancies were resolved by the Roisin's agar experiments, as more amino acids were shown to support growth in Roisin's agar than were positive for respiration in Biolog. Possible reasons for this include large differences in the incubation times for these experiments. In support of this theory, the amino acids not utilised in the Biolog experiments predominantly produced dysgonic colonies with a lag time of around 6-8 weeks on Roisin's agar (*M. bovis*: arginine C, N; glutamine C; glutamate C; glycine C; isoleucine C, N; proline C; serine C, N; *M. bovis* BCG: arginine C, N; glutamine C, N; glycine C; isoleucine C; proline C; serine C). Interestingly, the experimental data showed that the number of viable substrates decreased from *M. tuberculosis* to *M. bovis* to *M. bovis* BCG. This was not however reflected by significant network differences.

The amino acid data regarding serine metabolism was of particular interest because the results differed between the three mycobacteria and appeared inconsistent with *in silico* simulations. *In silico* serine metabolism is relatively complex compared to other amino acids as multiple pathways converge around serine (Figure 2). However, *in vitro* it is likely only the

interconversion of pyruvate and serine (serine dehydratase) enables utilisation of serine as a sole nitrogen source: as inadequate expression of serine dehydratase results in the inability of some BCG strains, including *M. bovis* BCG Pasteur, to utilise serine as a nitrogen source [33]. *M. tuberculosis*, which has been found to adequately express serine dehydratase can utilise L-serine [33,52], as can *M. bovis* strains (Table 6). *In silico*, however, the GSMN-BCG inaccurately predicts that serine is a viable sole nitrogen source for *M. bovis* BCG with flux to glycine (serine hydromethyltransferase) enabling viability. The three mycobacteria used in this study have two serine hydromethyltransferases (*glyA1* and *glyA2*); with enzyme activity demonstrated in *M. tuberculosis* [54]. The *glyA1* of *M. bovis* and *M. bovis* BCG have an amino acid substitution as compared to *M. tuberculosis* although the effect on the enzyme activity has not been tested. If the interconversion of serine and glycine is feasible in *M. bovis* BCG, this reaction doesn't appear to take place when serine is supplied as sole nitrogen source. However, because serine was shown to be a viable sole carbon source for *M. tuberculosis*, *M. bovis* and *M. bovis* BCG, flux from serine must be able to enter the TCA cycle. The most probable route for this would be via glycine (Figure 2).

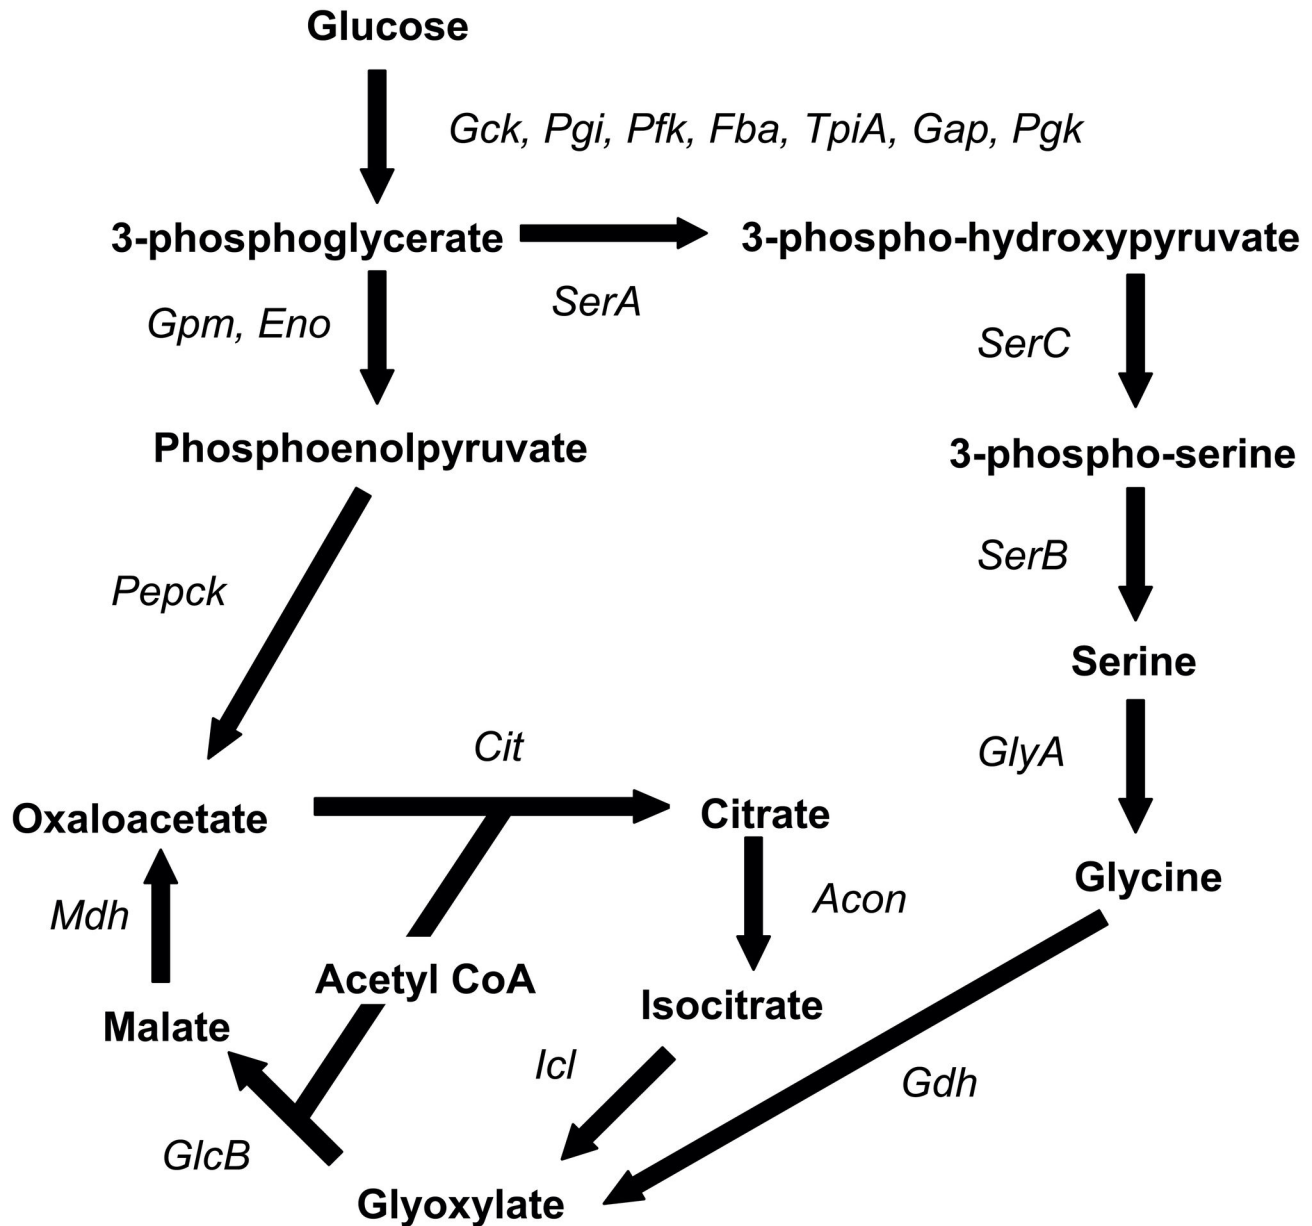

**Figure 1. GSMN-MB *in silico* flux prediction when glucose is a sole carbon source.** The *in silico* prediction of flux from glucose to the TCA cycle when glucose is a sole carbon source for *M. bovis*.

*Acon*: aconitase, *Cit*: citrate synthase, *Eno*: enolase, *Fba*: fructose-bisphosphate aldolase, *Gck*: glucokinase, *Gdh*: glycine dehydrogenase, *GlcB*: malate synthase, *GlyA*: glycine hydromethyltransferase, *Gpm*: phosphoglycerate mutase, *Icl*: isocitrate lyase, *Mdh*: malate dehydrogenase, *Pepck*: phosphoenolpyruvate carboxykinase, *Pfk*: 6-phosphofructokinase, *Pgi*: glucose-6-phosphate isomerase, *SerA*: phosphoglycerate dehydrogenase, *SerB*: phosphoserine phosphatase, *SerC*: phosphoserine transaminase, *TpiA*: triose-phosphate isomerase.

doi: 10.1371/journal.pone.0075913.g001

#### Validation of the model by comparison with *in vitro* growth rates

The GSMN-BCG was used to predict cellular growth rates on Roisin's media using published experimental data [29] on substrate uptake rates and corresponding growth rates.

Overall, *in silico* predictions were similar to the experimentally-determined growth rates (Table 7) and the growth rate generated by the GSMN-TB 1.1 network. Due to the inability of *M. bovis* to utilise glycerol, GSMN-MB was not tested.



**Table 6.** The utilisation of amino acids as carbon and nitrogen sources by *M. tuberculosis*, *M. bovis* and *M. bovis* BCG

| Substrate     | <i>M. tuberculosis</i> |               |           | <i>M. bovis</i> |               |           | <i>M. bovis</i> BCG |               |           |
|---------------|------------------------|---------------|-----------|-----------------|---------------|-----------|---------------------|---------------|-----------|
|               | Biolog                 | Roisin's agar | in silico | Biolog          | Roisin's agar | in silico | Biolog              | Roisin's agar | in silico |
| Alanine       | C                      | N C           | N C       | N -             | - -           | - -       | - -                 | - -           | - -       |
| Arginine      | -                      | - C           | N -       | N -             | - C           | N -       | N -                 | - C           | N -       |
| Asparagine    | C                      | N C           | N C       | N -             | N C           | N C       | N C                 | N C           | N C       |
| Aspartate     | -                      | - C           | N C       | N -             | - C           | N C       | N -                 | N C           | N C       |
| Cysteine      | NT                     | N -           | - -       | - NT            | N -           | N -       | - NT                | N -           | - -       |
| Glutamate     | C                      | N C           | N C       | N C             | N C           | N C       | N C                 | N C           | N C       |
| Glutamine     | C                      | N C           | N C       | N -             | N C           | N C       | N -                 | N C           | N C       |
| Glycine       | C                      | - C           | N C       | N -             | - C           | - C       | N -                 | - C           | - C       |
| Histidine     | -                      | - -           | - -       | - -             | - -           | - -       | - -                 | - -           | - -       |
| Isoleucine    | -                      | - C           | N C       | N -             | - C           | N C       | N -                 | - C           | - C       |
| Leucine       | -                      | - -           | - -       | - -             | - -           | - -       | - -                 | - -           | - -       |
| Lysine        | -                      | - -           | - -       | - -             | - -           | - -       | - -                 | - -           | - -       |
| Methionine    | -                      | - -           | - -       | - -             | - -           | - -       | - -                 | - -           | - -       |
| Phenylalanine | -                      | - -           | - -       | - -             | - -           | - -       | - -                 | - -           | - -       |
| Proline       | -                      | - C           | N C       | N -             | - C           | - C       | N -                 | - C           | - C       |
| Serine        | -                      | N C           | N C       | N -             | N C           | N C       | N -                 | - C           | - C       |
| Threonine     | -                      | - -           | N C       | N -             | - -           | - C       | N -                 | N -           | - C       |
| Tryptophan    | NT                     | - -           | - -       | - NT            | - -           | - -       | - NT                | - -           | - -       |
| Tyrosine      | NT                     | - -           | - -       | - NT            | - -           | - -       | - NT                | - -           | - -       |
| Valine        | -                      | - -           | N C       | N -             | - -           | - C       | N -                 | - -           | - C       |

C Utilised as a carbon substrate

N Utilised as a nitrogen substrate

- No respiration/growth

NT Not tested

doi: 10.1371/journal.pone.0075913.t006

### Validation of the model by comparison with global mutagenesis data

*In silico* gene essentiality predictions were compared with *in vitro* gene essentiality data as determined by Transposon site hybridization (TraSH) mutagenesis [30] and deep-sequencing [31] (Tables S5-S7). All models gave a very similar predictive accuracy (76-77%; Table 8) when compared against TraSH data, however, results were only available for 82% of genes in the models. Comparison of predictions with a more comprehensive evaluation (100% network coverage) of gene essentiality by deep-sequencing also generated a similar predictive accuracy (75%; Table 8).

Designation of a gene as either essential or non-essential is a binary characteristic that is generated from a continuous measurement of growth rate or mutant abundance (determined by microarray or sequencing) by applying an arbitrary cut-off value. To examine the influence of the cut-off value on predictive accuracy we plotted Receiver Operating Characteristic (ROC) curves (Figure 3; Figure S1-5). The majority (~91%) of *in silico* mutants generated a predicted growth rate equal to the wild-type or zero, so variation in the *in silico* growth rate threshold had very little influence on the result. However, *in vitro* cut-offs did influence prediction accuracy so ROC curves could be used to identify optimal values for the cut-off value of the *in vitro* measurement signal. For both TraSH and deep sequencing datasets the optimal

microarray and p-value cut-offs were the original values of 0.2 and 0.05 respectively.

Examining different areas of metabolism, the predictive accuracy (using deep sequencing data) varied from 61-62% in central carbon metabolism (glycolysis, TCA cycle, pentose phosphate cycle, methylcitrate cycle and anaplerotic reactions) to 95-96% in  $\beta$ -oxidation of fatty acids (Table 9). The chief source of errors for central carbon metabolism genes were false-negatives: genes predicted to be non-essential *in silico* but experimentally found to be essential. This likely reflects the multiple alternative pathways available for flux in *in silico* central metabolism, many of which are likely to be incapable of supporting sufficient flux for growth in real organisms. Peripheral areas of the network tend to generate higher predictive accuracies as fewer alternative pathways are available. Sources of false-negative *in silico* predictions may be due cross feeding between mutants in global mutagenesis studies.

### Discussion

The first genome scale metabolic models for *M. bovis* and *M. bovis* BCG, GSMN-MB and BCG, instantiate current metabolic knowledge and deliver a high degree of accuracy for predicting *in vitro* data. In combination with a *M. tuberculosis* network we have demonstrated how these models, and their application to interrogate high-throughput experimental data, shed new light

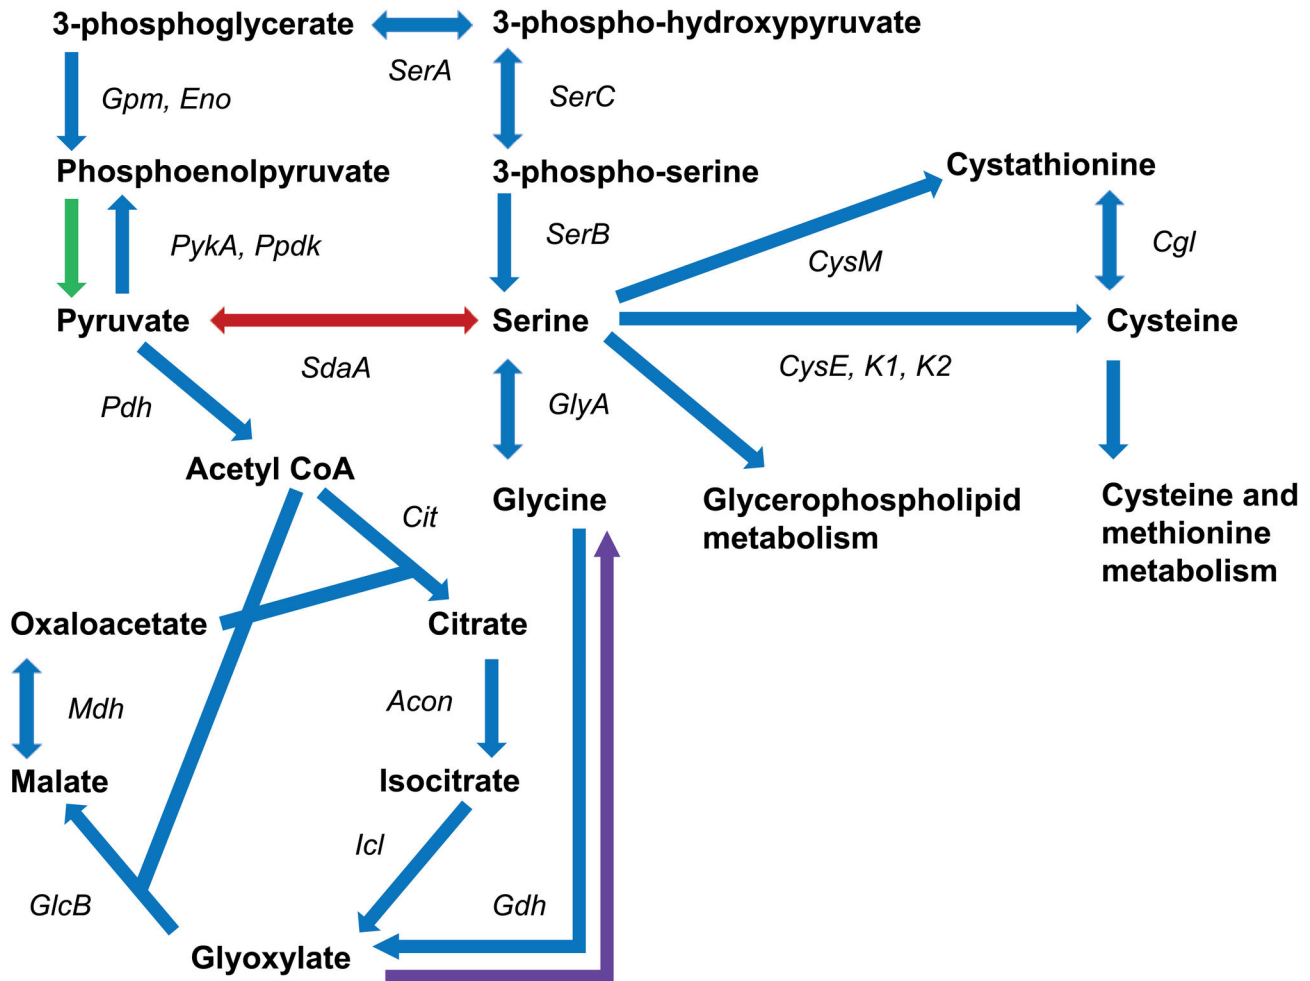

**Figure 2. The metabolic pathways that converge around L-serine in *Mycobacterium* species.** Blue: present in *M. tuberculosis*, *M. bovis* and *M. bovis* BCG, Red: present in *M. tuberculosis* and *M. bovis* [33], Green: present in *M. tuberculosis* and *M. bovis* BCG [3,18,19], Purple: present in *M. tuberculosis* [44].

*Acon*: aconitase, *Cgl*: cystathionine gamma-lyase *Cit*: citrate synthase, *CysE*, *CysK1*, *CysK2*: cysteine synthase, *CysM*: cystathionine beta-synthase, *Eno*: enolase, *Gdh*: glycine dehydrogenase, *GlcB*: malate synthase, *GlyA*: glycine hydromethyltransferase, *Gpm*: phosphoglycerate mutase, *Icl*: isocitrate lyase, *Mdh*: malate dehydrogenase, *Pdh*: pyruvate dehydrogenase, *PykA*: pyruvate kinase, *PpdK*: pyruvate phosphate dikinase, *SerA*: phosphoglycerate dehydrogenase, *SerB*: phosphoserine phosphatase, *SerC*: phosphoserine transaminase, *SdaA*: serine deaminase.

doi: 10.1371/journal.pone.0075913.g002

on metabolic differences between the vaccine, bovine and human strains of the tubercle bacillus. Therefore, these reaction networks successfully simulate many aspects of mycobacterial metabolism, and provide an invaluable tool for the investigation of metabolic differences between these strains.

*In silico* models are essentially a mathematical instantiation of current knowledge. Interrogating the models to generate predictions that can be tested against experimental datasets is thereby an efficient means of probing inconsistencies and limitations of current knowledge. The study described here illustrates this approach. The discordance between *in silico* and *in vitro* phenotypes highlights the limitations of FBA predictions

in which any route for flux from substrates to products may be utilised by the solution. For instance, the model predicted growth of *M. bovis* on glucose. This is contrary to expectations; indeed, this inability is a distinguishing feature of the *M. bovis* strain of the tubercle bacillus. Presumably the pathways utilised *in silico* to connect between glycolysis and the TCA cycle are not able to support growth *in vitro* [18,19] and additional defects [18], such as the identified deficiency in glucose uptake are also contributing to this phenotype.

However, our studies show that despite being unable to utilise glucose as a sole carbon source, the sugar can be assimilated by *M. bovis*. Indeed, glucose assimilation was stimulated by addition of Tween 80 to the glucose media [8,53].

**Table 7.** Comparison of *in silico* and *in vitro* growth rates on Roisin's minimal media using calculated substrate uptake rates.

| Substrate | Specific consumption rate (mmol g biomass <sup>-1</sup> h <sup>-1</sup> ) | <i>M. bovis</i> BCG         |                              | <i>M. tuberculosis</i>       |
|-----------|---------------------------------------------------------------------------|-----------------------------|------------------------------|------------------------------|
|           |                                                                           | <i>in vitro</i> growth rate | <i>in silico</i> growth rate | <i>in silico</i> growth rate |
| Glycerol  | 0.39                                                                      | 0.010                       | 0.009                        | 0.010                        |
| Tween 80  | 0.002                                                                     |                             |                              |                              |
| Glycerol  | 0.74                                                                      | 0.030                       | 0.030                        | 0.030                        |
| Tween 80  | 0.09                                                                      |                             |                              |                              |

doi: 10.1371/journal.pone.0075913.t007

**Table 8.** Accuracy of *in silico* gene essentiality predictions.

| Category            | TraSH       |         |          | Deep sequencing |         |          |
|---------------------|-------------|---------|----------|-----------------|---------|----------|
|                     | GSMN-TB 1.1 | GSMN-MB | GSMN-BCG | GSMN-TB 1.1     | GSMN-MB | GSMN-BCG |
| True positive       | 23%         | 24%     | 24%      | 23%             | 24%     | 24%      |
| False positive      | 8%          | 8%      | 8%       | 6%              | 6%      | 6%       |
| False negative      | 16%         | 16%     | 16%      | 19%             | 19%     | 20%      |
| True negative       | 53%         | 51%     | 51%      | 52%             | 50%     | 50%      |
| Correct predictions | 77%         | 76%     | 76%      | 75%             | 75%     | 75%      |
| p value             | 0.005       | 0.011   | 0.008    | 0.955           | 0.687   | 0.863    |

Percentage of *in silico* gene essentiality predictions categorised as: true-positive: essential both *in silico* and *in vitro*; false-positive: essential in silico, nonessential *in vitro*; true-negative: nonessential *in silico* and *in vitro*; false-negative: nonessential *in silico*, essential *in vitro*

doi: 10.1371/journal.pone.0075913.t008

Tween 80 is hydrolysed by mycobacteria to release fatty acids, such as oleic acid, that may be oxidised to acetate and thereby enter the TCA cycle to support the synthesis of essential metabolic precursors, such as oxaloacetate and  $\alpha$ -ketoglutarate, as well as providing substrates for energy generation. The result suggests that *M. bovis* is capable of assimilating carbohydrates such as glucose, but not delivering carbon from those substrates to the TCA cycle [18]; as the additional glucose was not oxidised to CO<sub>2</sub> and was presumably incorporated directly into cell biomass. The result is consistent with a previous study that demonstrated compartmentalisation during co-utilisation of different substrates in *M. tuberculosis* [55]. When supplied with both carbohydrate (such as glucose) and fatty acid (acetate), the carbohydrate was assimilated via glycolysis and the pentose phosphate cycle and mostly incorporated into biomass; whereas acetate was mainly used for energy generation via the TCA cycle [55]. It is interesting that this disconnect is

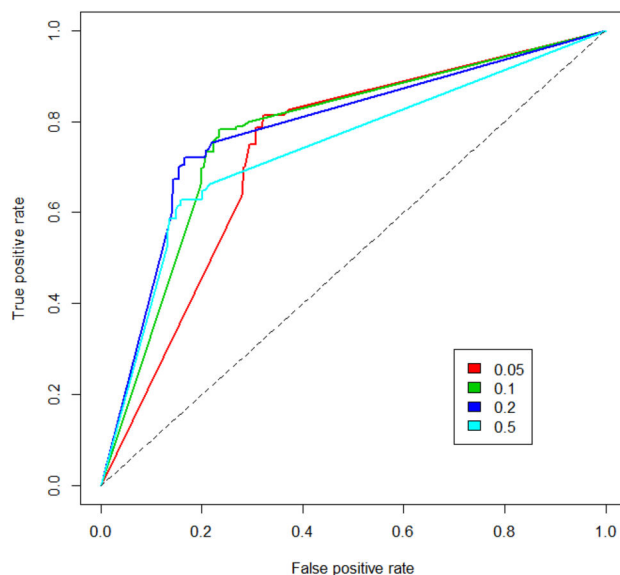**Figure 3.** The GSMN-MB ROC curve for TraSH thresholds. The plot shows ROC curves for different transposon site hybridisation (TraSH) ratio thresholds for the determination of essential genes in experimental data [30]. Five ROCs are plotted with 4 different TraSH thresholds as shown in the legend box. Each ROC curve shows the points corresponding to True positive rate (sensitivity) and false positive rate (1-specificity) of the model predictions obtained for all growth rate thresholds. For all ROC curves see Figures S1-S5.

doi: 10.1371/journal.pone.0075913.g003

**Table 9.** Percentage accuracy of gene essentiality predictions for each reaction pathway within the reaction networks.

| Pathway                                            | GSMN-TB 1.1 | GSMN-MB | GSMN-BCG |
|----------------------------------------------------|-------------|---------|----------|
| Amino acid metabolism                              | 76          | 75      | 75       |
| Carbohydrate metabolism (excl. central metabolism) | 72          | 75      | 71       |
| Cell wall synthesis                                | 88          | 88      | 88       |
| Central carbon metabolism                          | 61          | 62      | 61       |
| Cofactor biosynthesis                              | 66          | 66      | 66       |
| Lipid biosynthesis                                 | 77          | 77      | 78       |
| Nucleotide biosynthesis                            | 70          | 66      | 66       |
| Other functions                                    | 65          | 63      | 63       |
| Transport reactions                                | 94          | 95      | 95       |
| $\beta$ -oxidation of fatty acids                  | 95          | 96      | 96       |

doi: 10.1371/journal.pone.0075913.t009

unidirectional: *M. bovis* can utilise acetate as a sole carbon source so must be able to drive flux from acetate to glucose via gluconeogenic pathways.

Interrogating *in silico* models with high throughput phenotype and gene essentiality data provides a powerful route towards refinement of the networks, but also provides an insight into the complex relationship between genome and phenotype. The mycobacterial networks are well suited for investigations into the system-wide effects of genetic mutations due to their close evolutionary history, high genetic similarity and diverse phenotypes [3,5,6,8,50]. Both phenotype and gene essentiality data were predicted with a high degree of accuracy, but interestingly key discrepancies between existing genetic knowledge and experimental phenotypes were observed. For instance, the *in silico* models predicted very few metabolic differences between *M. tuberculosis*, *M. bovis* and *M. bovis* BCG, yet substrate utilisation capability between the strains decreased from *M. tuberculosis* > *M. bovis* and *M. bovis* BCG. It seems that during their evolutionary passage from their common ancestor (that is presumed to be closer to *M. tuberculosis*) [50], *M. bovis* and *M. bovis* BCG have lost some of their capability to metabolise compounds. The basis of this loss in metabolic versatility is unknown but could result from differences in enzyme regulation. For instance, the loss of pyruvate kinase in *M. bovis* results in a global alteration of enzyme expression which reroutes the catabolic pathways of metabolic substrates [19].

By comprehensively testing the utilisation of amino acids as sole nitrogen sources, loss in metabolic versatility was particularly evidenced in this study. *M. tuberculosis*, *M. bovis* and *M. bovis* BCG were able to assimilate nitrogen from 12, 8 and 6 amino acids respectively, despite current knowledge resulting in almost identical *in silico* predictions. The only difference *in silico* is the ability of *M. tuberculosis* to utilise alanine as a nitrogen (and carbon) source in contrast to *M. bovis* and *M. bovis* BCG. This difference corresponds to the previously mentioned mutation in the alanine dehydrogenase gene in *M. bovis* and *M. bovis* BCG, indicating that, in accordance with previous studies [33,44] this gene is required for alanine assimilation. Another interesting finding was that some amino acids, such as serine, could act as carbon but not nitrogen sources, indicating that the pathways responsible for amino acid degradation differ for carbon and nitrogen assimilation.

The differences observed between *in silico* and *in vitro* data not only identify areas of metabolism which require further investigation, but enable iterative network modifications. Since the model development process is continuous, the networks are altered as new information becomes available. These genome scale models already successfully simulate many aspects of mycobacterial growth and metabolism, but it is to be expected that the networks will gradually become more representative of cellular metabolism over time. Further comparative analysis will help to uncover the genetic basis for the observed phenotypic and pathogenic differences between these mycobacteria, and stimulate new approaches to the control of these diseases, such as the development of novel vaccines.

## Supporting Information

**Figure S1. GSMN-TB 1.1 TraSH ROC curve.**  
(TIFF)

**Figure S2. GSMN-BCG TraSH ROC curve.**  
(TIFF)

**Figure S3. GSMN-TB 1.1 Deep sequencing ROC curve.**  
(TIFF)

**Figure S4. GSMN-MB Deep sequencing ROC curve.**  
(TIFF)

**Figure S5. GSMN-BCG Deep sequencing ROC curve.**  
(TIFF)

**Table S1. GSMN-TB 1.1.**  
(XLS)

**Table S2. GSMN-MB.**  
(XLS)

**Table S3. GSMN-BCG.**  
(XLS)

**Table S4. Alterations to GSMN-TB 1.1 to create GSMN-MB and BCG networks.**  
(XLS)

**Table S5. GSMN-MB gene essentiality.**  
(XLSX)

**Table S6. GSMN-BCG gene essentiality.**  
(XLSX)

**Table S7. GSMN-TB 1.1 gene essentiality.**  
(XLSX)

**Table S8. *M. tuberculosis* carbon utilisation.**  
(XLSX)

**Table S9. *M. bovis* carbon utilisation.**  
(XLSX)

**Table S10. *M. bovis* BCG carbon utilisation.**  
(XLSX)

**Table S11. *M. tuberculosis* nitrogen utilisation.**  
(XLSX)

**Table S12. *M. bovis* nitrogen utilisation.**  
(XLSX)

**Table S13. *M. bovis* BCG nitrogen utilisation.**  
(XLSX)

**Model S1. GSMN-TB 1.1**  
(XML)

**Model S2. GSMN-MB**  
(XML)

**Model S3. GSMN-BCG**  
(XML)

## References

- de Lisle GW, Mackintosh CG, Bengis RG (2001) *Mycobacterium bovis* in free-living and captive wildlife, including farmed deer. *Rev Sci Tech* 20: 86-111. PubMed: 11288522.
- O'Reilly LM, Daborn CJ (1995) The epidemiology of *Mycobacterium bovis* infections in animals and man: a review. *Tuber Lung Dis* 76 Suppl 1: 1-46. doi:10.1016/0962-8479(95)90025-X. PubMed: 7579326.
- Garnier T, Eiglmeier K, Camus JC, Medina N, Mansoor H et al. (2003) The complete genome sequence of *Mycobacterium bovis*. *Proc Natl Acad Sci U S A* 100: 7877-7882. doi:10.1073/pnas.1130426100. PubMed: 12788972.
- World Health Organization (2012) Global Tuberculosis Report 2012.
- Brosch R, Gordon SV, Garnier T, Eiglmeier K, Frigui W et al. (2007) Genome plasticity of BCG and impact on vaccine efficacy. *Proc Natl Acad Sci U S A* 104: 5596-5601. doi:10.1073/pnas.0700869104. PubMed: 17372194.
- Cole ST, Brosch R, Parkhill J, Garnier T, Churcher C et al. (1998) Deciphering the biology of *Mycobacterium tuberculosis* from the complete genome sequence. *Nature* 393: 537-544. doi:10.1038/31159. PubMed: 9634230.
- Golby P, Hatch KA, Bacon J, Cooney R, Riley P et al. (2007) Comparative transcriptomics reveals key gene expression differences between the human and bovine pathogens of the *Mycobacterium tuberculosis* complex. *Microbiology* 153: 3323-3336. doi:10.1099/mic.0.2007/009894-0. PubMed: 17906132.
- Khatri B, Fielder M, Jones G, Newell W, Abu-Oun M et al. (2013) High Throughput Phenotypic Analysis of *Mycobacterium tuberculosis* and *Mycobacterium bovis* Strains' Metabolism Using Biolog Phenotype Microarrays. *PLOS ONE* 8: e52673. doi:10.1371/journal.pone.0052673. PubMed: 23326347.
- Pym AS, Brodin P, Brosch R, Huerre M, Cole ST (2002) Loss of RD1 contributed to the attenuation of the live tuberculosis vaccines *Mycobacterium bovis* BCG and *Mycobacterium microti*. *Mol Microbiol* 46: 709-717. doi:10.1046/j.1365-2958.2002.03237.x. PubMed: 12410828.
- Lewis KN, Liao R, Guinn KM, Hickey MJ, Smith S et al. (2003) Deletion of RD1 from *Mycobacterium tuberculosis* mimics bacille Calmette-Guerin attenuation. *J Infect Dis* 187: 117-123. doi:10.1086/345862. PubMed: 12508154.
- Kozak RA, Alexander DC, Liao R, Sherman DR, Behr MA (2011) Region of difference 2 contributes to virulence of *Mycobacterium tuberculosis*. *Infect Immun* 79: 59-66. doi:10.1128/IAI.00824-10. PubMed: 20974821.
- Pym AS, Brodin P, Majlessi L, Brosch R, Demangel C et al. (2003) Recombinant BCG exporting ESAT-6 confers enhanced protection against tuberculosis. *Nat Med* 9: 533-539. doi:10.1038/nm859. PubMed: 12692540.
- Schnappinger D, Ehrh S, Voskuil MI, Liu Y, Mangan JA et al. (2003) Transcriptional Adaptation of *Mycobacterium tuberculosis* within Macrophages: Insights into the Phagosomal Environment. *J Exp Med* 198: 693-704. doi:10.1084/jem.20030846. PubMed: 12953091.
- Marrero J, Rhee KY, Schnappinger D, Pethe K, Ehrh S (2010) Gluconeogenic carbon flow of tricarboxylic acid cycle intermediates is critical for *Mycobacterium tuberculosis* to establish and maintain infection. *Proc Natl Acad Sci U S A* 107: 9819-9824. doi:10.1073/pnas.1000715107. PubMed: 20439709.
- Venugopal A, Bryk R, Shi S, Rhee K, Rath P et al. (2011) Virulence of *Mycobacterium tuberculosis* depends on lipamide dehydrogenase, a member of three multienzyme complexes. *Cell Host Microbe* 9: 21-31. doi:10.1016/j.chom.2010.12.004. PubMed: 21238944.
- Shi S, Ehrh S (2006) Dihydrolipoamide acyltransferase is critical for *Mycobacterium tuberculosis* pathogenesis. *Infect Immun* 74: 56-63. doi:10.1128/IAI.74.1.56-63.2006. PubMed: 16368957.
- McKinney JD, Höner zu Bentrup K, Muñoz-Eliás EJ, Miczak A, Chen B et al. (2000) Persistence of *Mycobacterium tuberculosis* in macrophages and mice requires the glyoxylate shunt enzyme isocitrate lyase. *Nature* 406: 735-738. doi:10.1038/35021074. PubMed: 10963599.
- Keating LA, Wheeler PR, Mansoor H, Inwald JK, Dale J et al. (2005) The pyruvate requirement of some members of the *Mycobacterium tuberculosis* complex is due to an inactive pyruvate kinase: implications for *in vivo* growth. *Mol Microbiol* 56: 163-174. doi:10.1111/j.1365-2958.2005.04524.x. PubMed: 15773987.
- Chavadi S, Wooff E, Coldham NG, Sriharan M, Hewinson RG et al. (2009) Global effects of inactivation of the pyruvate kinase gene in the *Mycobacterium tuberculosis* complex. *J Bacteriol* 191: 7545-7553. doi:10.1128/JB.00619-09. PubMed: 19820096.
- Beste DJ, Hooper T, Stewart G, Bonde B, Avignone-Rossa C et al. (2007) GSMN-TB: a web-based genome-scale network model of *Mycobacterium tuberculosis* metabolism. *Genome Biol* 8: R89. doi:10.1186/gb-2007-8-5-r89. PubMed: 17521419.
- Jamshidi N, Palsson BO (2007) Investigating the metabolic capabilities of *Mycobacterium tuberculosis* H37Rv using the *in silico* strain iNJ661 and proposing alternative drug targets. *BMC. Syst Biol* 1: 26.
- Fang X, Wallqvist A, Reifman J (2010) Development and analysis of an *in vivo*-compatible metabolic network of *Mycobacterium tuberculosis*. *BMC. Syst Biol* 4: 160.
- Chindelevitch L, Stanley S, Hung D, Regev A, Berger B (2012) MetaMerge: scaling up genome-scale metabolic reconstructions, with application to *Mycobacterium tuberculosis*. *Genome Biol* 13: R6. doi:10.1186/gb-2012-13-1-r6. PubMed: 22292986.
- Gevorgyan A, Bushell ME, Avignone-Rossa C, Kierzek AM (2011) SurreyFBA: a command line tool and graphics user interface for constraint-based modeling of genome-scale metabolic reaction networks. *Bioinformatics* 27: 433-434. doi:10.1093/bioinformatics/btq679. PubMed: 21148545.
- Beste DJ, Peters J, Hooper T, Avignone-Rossa C, Bushell ME et al. (2005) Compiling a molecular inventory for *Mycobacterium bovis* BCG at two growth rates: evidence for growth rate-mediated regulation of ribosome biosynthesis and lipid metabolism. *J Bacteriol* 187: 1677-1684. doi:10.1128/JB.187.5.1677-1684.2005. PubMed: 15716438.
- Lechat P, Hummel L, Rousseau S, Moszer I (2008) GenoList: an integrated environment for comparative analysis of microbial genomes. *Nucleic Acids Res* 36: D469-D474. PubMed: 18032431.
- Bochner BR, Gadzinski P, Panomitros E (2001) Phenotype microarrays for high-throughput phenotypic testing and assay of gene function. *Genome Res* 11: 1246-1255. doi:10.1101/gr.186501. PubMed: 11435407.
- Oh YK, Palsson BO, Park SM, Schilling CH, Mahadevan R (2007) Genome-scale reconstruction of metabolic network in *Bacillus subtilis* based on high-throughput phenotyping and gene essentiality data. *J Biol Chem* 282: 28791-28799. doi:10.1074/jbc.M703759200. PubMed: 17573341.
- Beste DJ, Bonde B, Hawkins N, Ward JL, Beale MH et al. (2011) C Metabolic Flux Analysis Identifies an Unusual Route for Pyruvate Dissimilation in Mycobacteria which Requires Isocitrate Lyase and Carbon Dioxide Fixation 13. *PLOS Pathog* 7: e1002091
- Sassetti CM, Boyd DH, Rubin EJ (2003) Genes required for mycobacterial growth defined by high density mutagenesis. *Mol Microbiol* 48: 77-84. doi:10.1046/j.1365-2958.2003.03425.x. PubMed: 12657046.
- Griffin JE, Gawronski JD, Dejesus MA, Ioerger TR, Akerley BJ et al. (2011) High-resolution phenotypic profiling defines genes essential for mycobacterial growth and cholesterol catabolism. *PLOS Pathog* 7: e1002251. PubMed: 21980284.

## Author Contributions

Conceived and designed the experiments: EKL PRW DJVB BLK AMK JM. Performed the experiments: EKL PRW BLK. Analyzed the data: EKL PRW DJVB HW JM. Contributed reagents/materials/analysis tools: PRW HW AMK. Wrote the manuscript: EKL PRW DJVB JM. Making the reaction networks: EKL HW TAM AMK JM.

32. Behr MA, Schroeder BG, Brinkman JN, Slayden RA, Barry CE 3rd (2000) A point mutation in the *mma3* gene is responsible for impaired methoxymycolic acid production in *Mycobacterium bovis* BCG strains obtained after 1927. *J Bacteriol* 182: 3394-3399. doi:10.1128/JB.182.12.3394-3399.2000. PubMed: 10852869.
33. Chen JM, Alexander DC, Behr MA, Liu J (2003) *Mycobacterium bovis* BCG vaccines exhibit defects in alanine and serine catabolism. *Infect Immun* 71: 708-716. doi:10.1128/IAI.71.2.708-716.2003. PubMed: 12540549.
34. Pérez E, Constant P, Lemassu A, Laval F, Daffé M et al. (2004) Characterization of three glycosyltransferases involved in the biosynthesis of the phenolic glycolipid antigens from the *Mycobacterium tuberculosis* complex. *J Biol Chem* 279: 42574-42583. doi:10.1074/jbc.M406246200. PubMed: 15292272.
35. Gordon SV, Brosch R, Billault A, Garnier T, Eiglmeier K et al. (1999) Identification of variable regions in the genomes of tubercle bacilli using bacterial artificial chromosome arrays. *Mol Microbiol* 32: 643-655. doi: 10.1046/j.1365-2958.1999.01383.x. PubMed: 10320585.
36. David HL, Jahan MT (1977) beta-Glucosidase activity in mycobacteria. *J Clin Microbiol* 5: 383-384. PubMed: 856867.
37. Stermann M, Bohrsen A, Diephaus C, Maass S, Bange FC (2003) Polymorphic nucleotide within the promoter of nitrate reductase (*NarGHJ*) is specific for *Mycobacterium tuberculosis*. *J Clin Microbiol* 41: 3252-3259. doi:10.1128/JCM.41.7.3252-3259.2003. PubMed: 12843072.
38. Stermann M, Sedlacek L, Maass S, Bange FC (2004) A promoter mutation causes differential nitrate reductase activity of *Mycobacterium tuberculosis* and *Mycobacterium bovis*. *J Bacteriol* 186: 2856-2861. doi: 10.1128/JB.186.9.2856-2861.2004. PubMed: 15090527.
39. Honaker RW, Stewart A, Schittone S, Izzo A, Klein MR et al. (2008) *Mycobacterium bovis* BCG vaccine strains lack *narK2* and *narX* induction and exhibit altered phenotypes during dormancy. *Infect Immun* 76: 2587-2593. doi:10.1128/IAI.01235-07. PubMed: 18362135.
40. Sohaskey CD, Modesti L (2009) Differences in nitrate reduction between *Mycobacterium tuberculosis* and *Mycobacterium bovis* are due to differential expression of both *narGHJ* and *narK2*. *FEMS Microbiol Lett* 290: 129-134. PubMed: 19076631.
41. Sohaskey CD, Wayne LG (2003) Role of *narK2X* and *narGHJ* in hypoxic upregulation of nitrate reduction by *Mycobacterium tuberculosis*. *J Bacteriol* 185: 7247-7256. doi:10.1128/JB.185.24.7247-7256.2003. PubMed: 14645286.
42. Garcia Pelayo MC, Uplekar S, Keniry A, Mendoza Lopez P, Garnier T et al. (2009) A comprehensive survey of single nucleotide polymorphisms (SNPs) across *Mycobacterium bovis* strains and *M. bovis* BCG vaccine strains refines the genealogy and defines a minimal set of SNPs that separate virulent *M. bovis* strains and *M. bovis* BCG strains. *Infect Immun* 77: 2230-2238. doi:10.1128/IAI.01099-08. PubMed: 19289514.
43. Marri PR, Bannantine JP, Golding GB (2006) Comparative genomics of metabolic pathways in *Mycobacterium* species: gene duplication, gene decay and lateral gene transfer. *FEMS Microbiol Rev* 30: 906-925. doi: 10.1111/j.1574-6976.2006.00041.x. PubMed: 17064286.
44. Giffin MM, Modesti L, Raab RW, Wayne LG, Sohaskey CD (2012) *ald* of *Mycobacterium tuberculosis* encodes both the alanine dehydrogenase and the putative glycine dehydrogenase. *J Bacteriol* 194: 1045-1054. doi:10.1128/JB.05914-11. PubMed: 22210765.
45. Belley A, Alexander D, Di Pietrantonio T, Girard M, Jones J et al. (2004) Impact of methoxymycolic acid production by *Mycobacterium bovis* BCG vaccines. *Infect Immun* 72: 2803-2809. doi:10.1128/IAI.72.5.2803-2809.2004. PubMed: 15102790.
46. Bonicke R, Lisboa BP (1959) Type differentiation of tuberculosis bacteria with the aid of the nicotinamidase test. *Tuberkulosearzt* 13: 377-384. PubMed: 13676136.
47. Constant P, Perez E, Malaga W, Lanéelle MA, Saurel O et al. (2002) Role of the *pks15/1* gene in the biosynthesis of phenolglycolipids in the *Mycobacterium tuberculosis* complex. Evidence that all strains synthesize glycosylated p-hydroxybenzoic methyl esters and that strains devoid of phenolglycolipids harbor a frameshift mutation in the *pks15/1* gene. *J Biol Chem* 277: 38148-38158. doi:10.1074/jbc.M206538200. PubMed: 12138124.
48. Höner Zu Bentrup K, Miczak A, Swenson DL, Russell DG (1999) Characterization of activity and expression of isocitrate lyase in *Mycobacterium avium* and *Mycobacterium tuberculosis*. *J Bacteriol* 181: 7161-7167. PubMed: 10572116.
49. Rivera-Marrero CA, Ritzenthaler JD, Newburn SA, Roman J, Cummings RD (2002) Molecular cloning and expression of a novel glycolipid sulfotransferase in *Mycobacterium tuberculosis*. *Microbiology* 148: 783-792. PubMed: 11882713.
50. Brosch R, Gordon SV, Marmiesse M, Brodin P, Buchrieser C et al. (2002) A new evolutionary scenario for the *Mycobacterium tuberculosis* complex. *Proc Natl Acad Sci U S A* 99: 3684-3689. doi:10.1073/pnas.052548299. PubMed: 11891304.
51. Lamichane G, Zignol M, Blades NJ, Geiman DE, Dougherty A et al. (2003) A postgenomic method for predicting essential genes at subsaturation levels of mutagenesis: application to *Mycobacterium tuberculosis*. *Proc Natl Acad Sci U S A* 100: 7213-7218. doi:10.1073/pnas.1231432100. PubMed: 12775759.
52. Lyon RH, Hall WH, Costas-Martinez C (1970) Utilization of Amino Acids During Growth of *Mycobacterium tuberculosis* in Rotary Cultures. *Infect Immun* 1: 513-520. PubMed: 16557769.
53. Schaefer WB (1952) Growth requirements of dysgonic and eugonic strains of *Mycobacterium tuberculosis* var. *bovis*. *J Exp Med* 96: 207-219. doi:10.1084/jem.96.3.207. PubMed: 14955575.
54. Chaturvedi S, Bhakuni V (2003) Unusual structural, functional, and stability properties of serine hydroxymethyltransferase from *Mycobacterium tuberculosis*. *J Biol Chem* 278: 40793-40805. doi: 10.1074/jbc.M306192200. PubMed: 12913008.
55. de Carvalho LP, Fischer SM, Marrero J, Nathan C, Ehrst S et al. (2010) Metabolomics of *Mycobacterium tuberculosis* reveals compartmentalized co-catabolism of carbon substrates. *Chem Biol* 17: 1122-1131
