# Supplementary material for: Systems-Based Approaches to Probing Metabolic Variation within the Mycobacterium tuberculosis Complex
Source: PLoS One. 2013 Sep 17;8(9):e75913. doi: 10.1371/journal.pone.0075913 (PMC3783153; doi:10.1371/journal.pone.0075913)
Supplement: Table S4 — Alterations to GSMN-TB 1.1 to create GSMN-MB and BCG networks. (XLS) [file pone.0075913.s009.xls]

## Sheet: Alterations for bovine networks
Modifications to the GSMN-TB to create GSMN-MB and BCG
Reaction number	Gene	M. tuberculosis H37Rv annotation	M. bovis AF2122/97 annotation	M. bovis BCG Pasteur annotation	Action	References
1	glycerol kinase	Rv3696c		BCG_3755c	Gene annotation and reaction removed from GSMN-MB.	Garnier, T. et al., 2003
4	glycerol-3-phosphate dehydrogenase	Rv3302c OR Rv2249c	Mb3330c OR Mb2273c	BCG_3313c OR BCG_3367c OR BCG_2267c	Gene annotation added to GSMN-BCG.	Brosch, R. et al., 2007; Lechat et al., 2008
15	GDP-D-rhamnose biosynthesis	Rv0112 OR Rv1511	Mb0116	BCG_0145	Gene annotation removed from GSMN-MB and BCG.	Garnier, T. et al., 2003; Brosch, R. et al., 2007; Lechat et al., 2008
16, 17	GDP-4-dehydro-6-deoxy-D-mannose epimerase	Rv1512	-	-	Gene annotation removed from GSMN-MB and BCG.	Garnier, T. et al., 2003; Brosch, R. et al., 2007; Lechat et al., 2008
19	UTP-hexose-1-phosphate uridylyltransferase	( Rv0618 AND Rv0619 )	Mb0635	BCG_0665	Gene annotation removed from GSMN-MB and BCG.	Lechat et al., 2008; Garnier, T. et al., 2003; Brosch, R. et al., 2007; Marri et al., 2006
26	beta-glucosidase	Rv0186	-	-	Gene annotation and reaction removed from GSMN-MB and BCG.	David & Jahan, 1977
51	pyruvate kinase	Rv1617	-	BCG_1655	Gene annotation and reaction removed from GSMN-MB.	Garnier, T. et al., 2003
102, 85	isocitrate lyase	Rv0467	Mb0476 OR Mb1950	BCG_0507 OR BCG_1954	Gene annotation added to GSMN-MB and BCG.	Garnier, T. et al., 2003; Brosch, R. et al., 2007; Marri et al., 2006; Cole et al., 1998; Honer Zu Bentrup et al., 1999
105	(S)-2-hydroxy-acid oxidase	Rv1257c	-	-	Gene annotation and reaction removed from GSMN-MB and BCG.	Lechat et al., 2008
114	nitrate reductase	(Rv1161 AND Rv1162 AND Rv1164 AND Rv1163) OR Rv1736c	-	-	Gene annotations and reaction removed from GSMN-MB and BCG.	Stermann et al., 2003; Stermann et al., 2004
123	fumarate reductase/succinate deydrogenase	(Rv3318 AND Rv3319 AND Rv3316 AND Rv3317) OR (Rv1552 AND Rv1553 AND Rv1554 AND Rv1555)	(Mb3347 AND Mb3348 AND Mb3349 AND Mb3351) OR (Mb1578 AND Mb1579 AND Mb1580)	(BCG_3384 AND BCG_3385 AND BCG_3386 AND BCG_3388) OR (BCG_1604 AND BCG_1605 AND BCG_1606)	Gene annotations removed from GSMN-MB and BCG.	Garnier, T. et al., 2003; Brosch, R. et al., 2007; Lechat et al., 2008; Cole et al., 1998; Marri et al., 2006
186b	glycine dehydrogenase (deaminating)	<>	>	>	Reaction directionality constrained to the glyoxylate producing direction in GSMN-MB and BCG.	Giffin et al., 2012
188	L-serine ammonia-lyase (dehydratase)	Rv0069c	Mb0070c	-	Gene annotation and reaction removed from GSMN-BCG.	Chen et al., 2003
246	alanine dehydrogenase	Rv2780	-	-	Gene annotation annotation removed from GSMN-MB and BCG.	Garnier, T. et al., 2003; Brosch, R. et al., 2007; Keating et al., 2005
366	nicotinamidase	Rv2043c	-	-	Gene annotation and reaction removed from GSMN-MB and BCG.	Bonicke & Lisboa, 1959
447	precorrin-6Y C5,15-methyltransferase	Rv2072c	-	-	Gene annotation and reaction removed from GSMN-MB and BCG.	Gordon S.V et al., 1999
462	molybdopterin biosynthesis protein, moaE	(Rv3119 OR Rv0866) AND Rv3322c	-	-	Gene annotations and reaction removed from GSMN-MB and BCG.	Garnier, T. et al., 2003; Marri et al., 2006
552-570 & 575-583	enoyl-CoA hydratase/isomerase	Multiple annotations	Multiple annotations	Multiple annotations	Gene annotation (echA1) removed from GSMN-MB and BCG and gene annotation (echA18) added to GSMN-MB and BCG	Garnier, T. et al., 2003; Brosch, R. et al., 2007; Cole et al., 1998; Marri et al., 2007
590	Phospholipases	Multiple annotations	Multiple annotations	Multiple annotations	Gene annotations (plcA, plcB, plcC, plcD & mesT) removed from GSMN-MB and BCG.	Garcia Pelayo et al., 2009; Gordon S.V et al., 1999; Marri et al., 2006; Lechat et al., 2008
627, 632, 635	methoxy mycolic acid synthase	Rv0643c AND Rv0503c	Mb0662c AND Mb0515c	-	Gene annotations and reactions removed from GSMN BCG.	Belley et al., 2004; Behr et al., 2000
637	Synthesis of mycolic acids	Rv3801c	Mb3831c	BCG_3863c	Removal of methoxymycolic acids from the mycolic acid formulation in GSMN-BCG.	Belley et al., 2004; Behr et al., 2000
655	polyketide synthase, pks15/1	-	Mb2971c	BCG_2968c	Reaction and gene annotation added to GSMN-MB and BCG.	Garnier, T. et al., 2003; Brosch, R. et al., 2007; Lechat et al., 2008; Cole et al., 2008; Constant et al., 2002
662, 665	glycosyltransferase	Rv2958c	-	-	Gene annotation removed from GSMN-MB and BCG.	Perez et al., 2004
667	glycosyltransferase	Rv2957	-	-	Gene annotation and reactions removed from GSMN-MB and BCG.	Perez et al., 2004
668	sulfotransferase	Rv3529c OR Rv1373 OR Rv2267c	Mb3559c OR Mb2290c	BCG_3593c OR BCG_1434 OR BCG_2284c	Gene annotation removed from GSMN-MB.	Garnier, T. et al., 2003; Lechat et al., 2008
671	sulfolipid-1 synthesis	Rv3823c	-	-	Gene annotation and reaction removed from GSMN-MB and BCG.	Rivera-Marrero et al., 2002; Garnier, T. et al., 2003
672	mas-like gene, msl3	Rv1180 AND Rv1181	Mb1213	BCG_1243	Gene annotation removed from GSMN-MB and BCG.	Lechat et al., 2008
673	mas-like gene, msl4	Rv1180 AND Rv1182	Mb1214	BCG_1244	Gene annotation removed from GSMN-MB and BCG.	Lechat et al., 2008
674	mas-like gene, msl5	Rv1180 AND Rv1183	Mb1215	BCG_1245	Gene annotation removed from GSMN-MB and BCG.	Lechat et al., 2008
801	nitrate transporter	Rv1737c	-	-	Gene annotation and reaction removed from GSMN-MB and BCG.	Honaker et al., 2008; Sohaskey et al., 2009; Sohaskey et al., 2003
838	phosphate transport (pstB)	(Rv0934 AND Rv0936 AND Rv0935 AND Rv0933) OR (Rv0932c AND Rv0930 AND Rv0929 AND Rv0933) OR (Rv0928 AND Rv0930 AND Rv0928 AND Rv0933)	-	-	Gene annotations and reaction removed from GSMN-MB and BCG.	Garnier, T. et al., 2003; Garcia Pelayo et al., 2009
906	glycerol-3-phosphate/phosphate antiporter	Rv2832c AND Rv2833c AND Rv2834c AND Rv2835c	-	-	Gene annotations and reaction removed from GSMN-MB and BCG.	Garnier, T. et al., 2003; Brosch, R. et al., 2007
SL-1	sulfolipid-1 synthesis	-	-	-	Reaction removed from GSMN-MB and BCG. SL1 removed from GSMN-MB and BCG fast and slow growth biomass requirements.	Rivera-Marrero et al., 2002; Garnier, T. et al., 2003
TAG	triacylglycerol synthase	Multiple annotations	Multiple annotations	Multiple annotations	Gene annotation (Rv3233c) deleted from GSMN-MB and BCG.	Lechat et al., 2008
Mycoside B	glycosyltransferase	-	-	-	Mycoside B added to GSMN-MB and BCG fast and slow growth biomass requirements.	Perez et al., 2004; Constant et al., 2002

## Sheet: References
References
Behr M.A., Wilson M.A., Gill W.P., Salamon H., Schoolnik G.K., Rane S., et al., Comparative genomics of BCG vaccines by whole-genome DNA microarray. Science. 1999; 284: 1520-1523.
Belley A., Alexander D., Di Pietrantonio T., Girard M., Jones J., Schurr E., et al., Impact of methoxymycolic acid production by Mycobacterium bovis BCG vaccines. Infect Immun. 2004; 72: 2803-2809.
Bonicke R., Lisboa B.P. Type differentiation of tuberculosis bacteria with the aid of the nicotinamidase test. Tuberkulosearzt. 1959; 13: 377-384.
Brosch R., Gordon S.V., Garnier T., Eiglmeier K., Frigui W., Valenti P., et al., Genome plasticity of BCG and impact on vaccine efficacy. PNAS. 2007; 104: 5596-5601.
Chen J.M., Alexander D.C., Behr M.A., Liu J. Mycobacterium bovis BCG vaccines exhibit defects in alanine and serine catabolism. Infect Immun. 2003; 71: 708-716.
Cole S.T., Brosch R., Parkhill J., Garnier T., Churcher C., Harris D., et al., Deciphering the biology of Mycobacterium tuberculosis from the complete genome sequence. Nature. 1998; 393: 537-544.
Constant P., Perez E., Malaga W., Laneelle M.A., Saurel O., Daffe M., and Guilhot C. Role of the pks15/1 gene in the biosynthesis of phenolglycolipids in the Mycobacterium tuberculosis complex. Evidence that all strains synthesize glycosylated p-hydroxybenzoic methly esters and that strains devoid of phenolglycolipids harbor a frameshift mutation in the pks15/1 gene. J. Biol. Chem. 2002. 277, 381…
David H.L., Jahan M.T. beta-Glucosidase activity in mycobacteria. J Clin Microbiol. 1977; 5: 383-384.
Garnier T., Eiglmeier K., Camus J.C., Medina N., Mansoor H., Pryor M., et al., The complete genome sequence of Mycobacterium bovis. PNAS. 2003; 100: 7877-7882.
Giffin M.M., Modesti L., Raab R.W., Wayne L.G., Sohaskey C.D. ald of Mycobacterium tuberculosis encodes both the alanine dehydrogenase and the putative glycine dehydrogenase. J Bacteriol. 2012; 194: 1045-1054.
Gordon S.V., Brosch R., Billault A., Garnier T., Eiglmeier K., Cole S.T. Identification of variable regions in the genomes of tubercle bacilli using bacterial artificial chromosome arrays. Mol Microbiol. 1999; 32: 643-655.
Honaker RW, Stewart A, Schittone S, Izzo A, Klein MR, et al. (2008) Mycobacterium bovis BCG vaccine strains lack narK2 and narX induction and exhibit altered phenotypes during dormancy. Infect Immun 76: 2587-2593.
Honer Zu Bentrup K., Miczak A., Swenson D.L., & Russell D.G., Characterization of activity and expression of isocitrate lyase in Mycobacterium avium and Mycobacterium tuberculosis. J Bacteriol. 1999; 181: 7161–7167.
Keating L.A., Wheeler P.R., Mansoor H., Inwald J.K., Dale J., Hewinson R.G., et al., The pyruvate requirement of some members of the Mycobacterium tuberculosis complex is due to an inactive pyruvate kinase: implications for in vivo growth. Mol Microbiol. 2005; 56: 163-174.
Lechat P., Hummel L., Rousseau S., Moszer I. GenoList: an integrated environment for comparative analysis of microbial genomes. Nucleic Acids Res. 2008; 36: D469-474
Marri P.R., Bannantine J.P., Golding G.B. Comparative genomics of metabolic pathways in Mycobacterium species: gene duplication, gene decay and lateral gene transfer. FEMS Microbiol Rev. 2006; 30: 906-925.
Perez E., Constant P., Lemassu A., Laval F., Daffe M., Guilhot C. Characterization of three glycosyltransferases involved in the biosynthesis of the phenolic glycolipid antigens from the Mycobacterium tuberculosis complex. J Biol Chem. 2004; 279: 42574-42583.
Rivera-Marrero C.A., Ritzenthaler J.D., Newburn S.A., Roman J., Cummings R.D. Molecular cloning and expression of a novel glycolipid sulfotransferase in Mycobacterium tuberculosis. Microbiol. 2002; 148: 783-792.
Sohaskey C.D., Modesti L., Differences in nitrate reduction between Mycobacterium tuberculosis and Mycobacterium bovis are due to differential expression of both narGHJI and narK2. FEMS Microbiol Lett. 2009. 290: 129-134.
Sohaskey C.D., Wayne LG., Role of narK2X and narGHJI in hypoxic upregulation of nitrate reduction by Mycobacterium tuberculosis. J Bacteriol. 2003. 185: 7247-7256.
Stermann M., Bohrssen A., Diephaus C., Maass S.,Bange F.C. Polymorphic nucleotide within the promoter of nitrate reductase (NarGHJI) is specific for Mycobacterium tuberculosis. J Clin Microbiol. 2003; 41: 3252-3259.
Stermann M., Sedlacek L., Maass S., Bange F.C. A promoter mutation causes differential nitrate reductase activity of Mycobacterium tuberculosis and Mycobacterium bovis. J Bacteriol. 2004; 186: 2856-2861.
