# Supplementary material for: Systems-Based Approaches to Probing Metabolic Variation within the Mycobacterium tuberculosis Complex
Source: PLoS One. 2013 Sep 17;8(9):e75913. doi: 10.1371/journal.pone.0075913 (PMC3783153; doi:10.1371/journal.pone.0075913)
Supplement: Table S6 — GSMN-BCG gene essentiality. (XLSX) [file pone.0075913.s011.xlsx]

## Sheet: GSMN-BCG gene essentiality
GSMN BCG gene essentiality predictions
										TraSH			Deep sequencing
Gene annotation M. bovis BCG Pasteur	Gene annotation M.tuberculosis H37Rv	Gene	Gene ID	Reaction-ID	Reaction pathway		E.C. number	Growth rate	in silico essentiality	Ratio	Result	in silico vs in vitro result	p value	Result	in silico vs in vitro result
BCG_0019	Rv3913	thioredoxin-disulfide reductase	trxB2	310	Nucleotide biosynthesis, Pyrimidines	Nucleotide biosynthesis	1.8.1.9	0	E	0.0688711	E	TP	7e-05	E	TP
BCG_0043	Rv0013	aminodeoxychorismate synthase	trpG	403	Cofactor biosynthesis, Folate biosynthesis	Cofactor biosynthesis	6.3.5.8	0.107234	NE	no-data	no-data	no-data	0.00048	E	FN
BCG_0063	Rv0032	probable-8-amino-7-oxononanoate synthase bioF1, bioF2	bioF2	420	Cofactor biosynthesis, biotin biosynthesis	Cofactor biosynthesis	2.3.1.47	0.107234	NE	0.46446	NE	TN	0.00724	E	FN
BCG_0066	Rv0035	acyl-CoA dehydrogenase fadE1-36 AND enoyl-CoA hydratase/isomerase echA1-21 AND 3-hydroxyacyl-CoA dehydrogenase fadB2-5 AND acetyl-CoA C-acetyltransferase fadA2-11	fadD34	537, 538, 539, 540, 541, 542, 543, 544, 545, 546, 547, 548, 549, 550, 551	beta oxidation of fatty acids	β oxidation of fatty acids	1.3.99.3 AND 4.2.1.17 AND 1.1.1.35 AND 2.3.1.16	0.107234	NE	1.75651	NE	TN	0.99807	NE	TN
BCG_0077c	Rv0046c	inositol-1-phosphate synthase, Ino1	ino1	22	Inositols, MYO-INOSITOL SYNTHESIS	Lipid biosynthesis	5.5.1.5 and 5.5.1.4	0.107234	NE	0.416912	NE	TN	7e-05	E	FN
BCG_0097c	Rv0066c	isocitrate dehydrogenase (NADP), icd1, icd2	icd2	58	Citrate cycle (TCA cycle)	Central carbon metabolism	1.1.1.42	0.107234	NE	0.334296	NE	TN	0	E	FN
BCG_0101c	Rv0070c	glycine hydroxymethyltransferase glyA, glyA2	glyA	185	Amino acid degradation, The serine family, Glycine	Amino acid metabolism	2.1.2.1	0.107234	NE	2.13719	NE	TN	0.67826	NE	TN
BCG_0131	Rv0098	fas II Module (kasA/B, mabA/fabG1, fabA/fab2, inhA)	-	624, 625, 626, 628, 629, 630	lipid biosynthesis, Synthesis of mycolic acids, FASIIA module	Lipid biosynthesis	2.3.1.41 and 1.1.1.100 and 2.1.1.-	0.107234	NE	0.877549	NE	TN	0.53046	NE	TN
BCG_0132	Rv0099	acyl-CoA dehydrogenase fadE1-36 AND enoyl-CoA hydratase/isomerase echA1-21 AND 3-hydroxyacyl-CoA dehydrogenase fadB2-5 AND acetyl-CoA C-acetyltransferase fadA2-11	fadD10	537, 538, 539, 540, 541, 542, 543, 544, 545, 546, 547, 548, 549, 550, 551	beta oxidation of fatty acids	β oxidation of fatty acids	1.3.99.3 AND 4.2.1.17 AND 1.1.1.35 AND 2.3.1.16	0.107234	NE	0.889811	NE	TN	0.12017	NE	TN
BCG_0145	Rv0112	Possible GDP-Mannose 4,6-dehydratase gca, gmdA	gca	15	GDP-D-rhamnose biosynthesis/ Fructose and mannose metabolism	Carbohydrate metabolism (excluding central metabolism)	4.2.1.47	0.107234	NE	0.0910024	E	FN	0.03077	E	FN
BCG_0153	Rv0119	acyl-CoA dehydrogenase fadE1-36 AND enoyl-CoA hydratase/isomerase echA1-21 AND 3-hydroxyacyl-CoA dehydrogenase fadB2-5 AND acetyl-CoA C-acetyltransferase fadA2-11	fadD7	537, 538, 539, 540, 541, 542, 543, 544, 545, 546, 547, 548, 549, 550, 551	beta oxidation of fatty acids	β oxidation of fatty acids	1.3.99.3 AND 4.2.1.17 AND 1.1.1.35 AND 2.3.1.16	0.107234	NE	no-data	no-data	no-data	0.00045	E	FN
BCG_0163c	Rv0129c	mycoyltransferase Antigen-85 complex (FbpA, FbpB, FbpC), mycoyltransferase Antigen-85 complex (FbpA, FbpB, FbpC)	fbpC	MAPC, TDM	lipid biosynthesis, Synthesis of mycolic acids, MYCOLIC ACID CONDENSATION	Lipid biosynthesis	2.3.1.-	0	E	1.07859	NE	FP	0.19361	NE	FP
BCG_0164	Rv0130	fas II Module (kasA/B, mabA/fabG1, fabA/fab2, inhA)	-	624, 625, 626, 628, 629, 630	lipid biosynthesis, Synthesis of mycolic acids, FASIIA module	Lipid biosynthesis	2.3.1.41 and 1.1.1.100 and 2.1.1.-	0.107234	NE	0.796981	NE	TN	0.86358	NE	TN
BCG_0165c	Rv0131c	acyl-CoA dehydrogenase fadE1-36 AND enoyl-CoA hydratase/isomerase echA1-21 AND 3-hydroxyacyl-CoA dehydrogenase fadB2-5 AND acetyl-CoA C-acetyltransferase fadA2-6	fadE1	552, 553, 554, 555, 556, 557, 558, 559, 560, 561, 562, 563, 564, 565, 566, 567, 568, 569, 570, 575, 576, 577, 578, 579, 580, 581, 582	beta oxidation of fatty acids	β oxidation of fatty acids	1.3.99.3 AND 4.2.1.17 AND 1.1.1.35 AND 2.3.1.16	0.107234	NE	0.864329	NE	TN	0.98889	NE	TN
BCG_0190c	Rv0154c	acyl-CoA dehydrogenase fadE1-36 AND enoyl-CoA hydratase/isomerase echA1-21 AND 3-hydroxyacyl-CoA dehydrogenase fadB2-5 AND acetyl-CoA C-acetyltransferase fadA2-6	fadE2	552, 553, 554, 555, 556, 557, 558, 559, 560, 561, 562, 563, 564, 565, 566, 567, 568, 569, 570, 575, 576, 577, 578, 579, 580, 581, 582	beta oxidation of fatty acids	β oxidation of fatty acids	1.3.99.3 AND 4.2.1.17 AND 1.1.1.35 AND 2.3.1.16	0.107234	NE	2.10459	NE	TN	0.53046	NE	TN
BCG_0191	Rv0155	NAD(P) transhydrogenase (pntAa AND pntAb AND pntB) and Probable Soluble Pyrimidine Nucleotide Transhydrogenase sthA	pntAa	376	Cofactor biosynthesis, Nicotinamide nucleotides (NAD+, NADP) biosynthesis	Cofactor biosynthesis	1.6.1.2 and 1.6.1.1	0.107234	NE	no-data	no-data	no-data	0.74854	NE	TN
BCG_0192	Rv0156	NAD(P) transhydrogenase (pntAa AND pntAb AND pntB) and Probable Soluble Pyrimidine Nucleotide Transhydrogenase sthA	pntAb	376	Cofactor biosynthesis, Nicotinamide nucleotides (NAD+, NADP) biosynthesis	Cofactor biosynthesis	1.6.1.2 and 1.6.1.1	0.107234	NE	0.705964	NE	TN	0.39226	NE	TN
BCG_0193	Rv0157	NAD(P) transhydrogenase (pntAa AND pntAb AND pntB) and Probable Soluble Pyrimidine Nucleotide Transhydrogenase sthA	pntB	376	Cofactor biosynthesis, Nicotinamide nucleotides (NAD+, NADP) biosynthesis	Cofactor biosynthesis	1.6.1.2 and 1.6.1.1	0.107234	NE	0.884043	NE	TN	0.84779	NE	TN
BCG_0198c	Rv0162c	alcohol dehydrogenase adhA, adh, adhE1, adhB	adhE1	73	Pyruvate metabolism	Other	1.1.1.1	0.107234	NE	0.940703	NE	TN	0.88157	NE	TN
BCG_0203	Rv0166	acyl-CoA dehydrogenase fadE1-36 AND enoyl-CoA hydratase/isomerase echA1-21 AND 3-hydroxyacyl-CoA dehydrogenase fadB2-5 AND acetyl-CoA C-acetyltransferase fadA2-11	fadD5	537, 538, 539, 540, 541, 542, 543, 544, 545, 546, 547, 548, 549, 550, 551	beta oxidation of fatty acids	β oxidation of fatty acids	1.3.99.3 AND 4.2.1.17 AND 1.1.1.35 AND 2.3.1.16	0.107234	NE	1.61123	NE	TN	0.82864	NE	TN
BCG_0220	Rv0183	-	-	574	Acylglycerol catabolism, Monoacylglyceride	Lipid biosynthesis	3.1.1.23	0.107234	NE	1.36095	NE	TN	0.97648	NE	TN
BCG_0226c	Rv0189c	dihydroxy-acid dehydratase ilvD	ilvD	213, 218	Amino acid biosynthesis, Branched chain amino acids, Valine	Amino acid metabolism	4.2.1.9	0	E	0.0917148	E	TP	0	E	TP
BCG_0231	Rv0194	ABC transporters	-	TMM	lipid biosynthesis, Synthesis of mycolic acids, MYCOLIC ACID CONDENSATION	Lipid biosynthesis	-	0.107234	NE	2.1504	NE	TN	0.99911	NE	TN
BCG_0248	Rv0211	phosphoenolpyruvate carboxykinase (GTP) pckA	pckA	101	Anapleurotic reactions	Central carbon metabolism	4.1.1.32	0.106983	NE	no-data	no-data	no-data	0	E	FN
BCG_0251	Rv0214	acyl-CoA dehydrogenase fadE1-36 AND enoyl-CoA hydratase/isomerase echA1-21 AND 3-hydroxyacyl-CoA dehydrogenase fadB2-5 AND acetyl-CoA C-acetyltransferase fadA2-11	fadD4	537, 538, 539, 540, 541, 542, 543, 544, 545, 546, 547, 548, 549, 550, 551	beta oxidation of fatty acids	β oxidation of fatty acids	1.3.99.3 AND 4.2.1.17 AND 1.1.1.35 AND 2.3.1.16	0.107234	NE	2.77754	NE	TN	0.98598	NE	TN
BCG_0252c	Rv0215c	acyl-CoA dehydrogenase fadE1-36 AND enoyl-CoA hydratase/isomerase echA1-21 AND 3-hydroxyacyl-CoA dehydrogenase fadB2-5 AND acetyl-CoA C-acetyltransferase fadA2-6	fadE3	552, 553, 554, 555, 556, 557, 558, 559, 560, 561, 562, 563, 564, 565, 566, 567, 568, 569, 570, 575, 576, 577, 578, 579, 580, 581, 582	beta oxidation of fatty acids	β oxidation of fatty acids	1.3.99.3 AND 4.2.1.17 AND 1.1.1.35 AND 2.3.1.16	0.107234	NE	2.33062	NE	TN	0.67826	NE	TN
BCG_0254c	Rv0217c	Probable Phospholipases	lipW	590	Inositol phosphate metabolism, Glycerophospholipid metabolism	Lipid biosynthesis	3.1.4.3	0.107234	NE	1.19664	NE	TN	0.73366	NE	TN
BCG_0257	Rv0220	Probable Phospholipases	lipC	590	Inositol phosphate metabolism, Glycerophospholipid metabolism	Lipid biosynthesis	3.1.4.3	0.107234	NE	0.829739	NE	TN	0.3276	NE	TN
BCG_0258	Rv0221	triacylglycerol synthase	-	TAG	triglyceride synthesis	Lipid biosynthesis	2.3.1.75	0.107234	NE	no-data	no-data	no-data	0.97022	NE	TN
BCG_0268	Rv0231	acyl-CoA dehydrogenase fadE1-36 AND enoyl-CoA hydratase/isomerase echA1-21 AND 3-hydroxyacyl-CoA dehydrogenase fadB2-5 AND acetyl-CoA C-acetyltransferase fadA2-6	fadE4	552, 553, 554, 555, 556, 557, 558, 559, 560, 561, 562, 563, 564, 565, 566, 567, 568, 569, 570, 575, 576, 577, 578, 579, 580, 581, 582	beta oxidation of fatty acids	β oxidation of fatty acids	1.3.99.3 AND 4.2.1.17 AND 1.1.1.35 AND 2.3.1.16	0.107234	NE	2.91794	NE	TN	0.9999	NE	TN
BCG_0271c	Rv0234c	succinate-semialdehyde dehydrogenase gabD1, gabD2	gabD1	137	Amino acid degradation, Glutamate family, Glutamate	Amino acid metabolism	2.6.1.19	0.107234	NE	no-data	no-data	no-data	0.9508	NE	TN
BCG_0280c	Rv0242c	fas II Module (kasA/B, mabA/fabG1, fabA/fab2, inhA)	fabG	621, 624, 625, 626, 628, 629, 630	lipid biosynthesis, Synthesis of mycolic acids, FASIIA module	Lipid biosynthesis	2.3.1.41 and 1.1.1.100 and 2.1.1.-	0.107234	NE	0.960829	NE	TN	0.08394	NE	TN
BCG_0281	Rv0243	acyl-CoA dehydrogenase fadE1-36 AND enoyl-CoA hydratase/isomerase echA1-21 AND 3-hydroxyacyl-CoA dehydrogenase fadB2-5 AND acetyl-CoA C-acetyltransferase fadA2-6	fadA2	552, 553, 554, 555, 556, 557, 558, 559, 560, 561, 562, 563, 564, 565, 566, 567, 568, 569, 570, 575, 576, 577, 578, 579, 580, 581, 582	beta oxidation of fatty acids	β oxidation of fatty acids	1.3.99.3 AND 4.2.1.17 AND 1.1.1.35 AND 2.3.1.16	0.107234	NE	0.952539	NE	TN	0.46875	NE	TN
BCG_0282c	Rv0244c	acyl-CoA dehydrogenase fadE1-36 AND enoyl-CoA hydratase/isomerase echA1-21 AND 3-hydroxyacyl-CoA dehydrogenase fadB2-5 AND acetyl-CoA C-acetyltransferase fadA2-6	fadE5	552, 553, 554, 555, 556, 557, 558, 559, 560, 561, 562, 563, 564, 565, 566, 567, 568, 569, 570, 575, 576, 577, 578, 579, 580, 581, 582	beta oxidation of fatty acids	β oxidation of fatty acids	1.3.99.3 AND 4.2.1.17 AND 1.1.1.35 AND 2.3.1.16	0.107234	NE	no-data	no-data	no-data	0.99682	NE	TN
BCG_0292c	Rv0254c	Probable cobinamide kinase, cobU, and adenosylcobinamide-phosphate guanylyltransferase	cobU	455	Cofactor biosynthesis, cobalamin biosynthesis	Cofactor biosynthesis	2.7.- and 2.7.7.62	0.107234	NE	1.05989	NE	TN	0.77686	NE	TN
BCG_0293c	Rv0255c	Probable cobyric acid synthase, cobQ	cobQ1	453	Cofactor biosynthesis, cobalamin biosynthesis	Cofactor biosynthesis	6.3.5.10	0.107234	NE	1.4379	NE	TN	0.97648	NE	TN
BCG_0308	Rv0270	acyl-CoA dehydrogenase fadE1-36 AND enoyl-CoA hydratase/isomerase echA1-21 AND 3-hydroxyacyl-CoA dehydrogenase fadB2-5 AND acetyl-CoA C-acetyltransferase fadA2-11	fadD2	537, 538, 539, 540, 541, 542, 543, 544, 545, 546, 547, 548, 549, 550, 551	beta oxidation of fatty acids	β oxidation of fatty acids	1.3.99.3 AND 4.2.1.17 AND 1.1.1.35 AND 2.3.1.16	0.107234	NE	2.31447	NE	TN	0.9985	NE	TN
BCG_0309c	Rv0271c	acyl-CoA dehydrogenase fadE1-36 AND enoyl-CoA hydratase/isomerase echA1-21 AND 3-hydroxyacyl-CoA dehydrogenase fadB2-5 AND acetyl-CoA C-acetyltransferase fadA2-6	fadE6	552, 553, 554, 555, 556, 557, 558, 559, 560, 561, 562, 563, 564, 565, 566, 567, 568, 569, 570, 575, 576, 577, 578, 579, 580, 581, 582	beta oxidation of fatty acids	β oxidation of fatty acids	1.3.99.3 AND 4.2.1.17 AND 1.1.1.35 AND 2.3.1.16	0.107234	NE	0.555432	NE	TN	0.99984	NE	TN
BCG_0313c	Rv0275c	acyl-CoA dehydrogenase fadE1-36 AND enoyl-CoA hydratase/isomerase echA1-21 AND 3-hydroxyacyl-CoA dehydrogenase fadB2-5 AND acetyl-CoA C-acetyltransferase fadA2-11	-	537, 538, 539, 540, 541, 542, 543, 544, 545, 546, 547, 548, 549, 550, 551	beta oxidation of fatty acids	β oxidation of fatty acids	1.3.99.3 AND 4.2.1.17 AND 1.1.1.35 AND 2.3.1.16	0.107234	NE	no-data	no-data	no-data	0.82622	NE	TN
BCG_0361	Rv0321	dCTP deaminase	dcd	300	Nucleotide biosynthesis, de novo biosynthesis of pyrimidine deoxyribonucleotides	Nucleotide biosynthesis	3.5.4.13	0.107234	NE	0.57784	NE	TN	0.82622	NE	TN
BCG_0373	Rv0334	alpha-D-glucose-1-phosphate thymidylyl-transferase rmlA	rmlA	707	synthesis of arabinogalactan (incomplete), dTDP-Rhamnose Synthesis	Cell wall syntheisis	2.7.7.24	0	E	0.0874394	E	TP	2e-05	E	TP
BCG_0376c	Rv0337c	L-Tyrosine:2-oxoglutarate aminotransferase, L-Phenylalanine:2-oxoglutarate aminotransferase, aspartate transaminase aspB, aspC	aspC	190, 195, 225, 284, 286	Amino acid degradation, The aromatic family, Tyrosine	Amino acid metabolism	2.6.1.5 and 2.6.1.1	0.107234	NE	0.0606256	E	FN	0	E	FN
BCG_0395c	Rv0357c	adenylosuccinate synthase	purA	349	Nucleotide biosynthesis, Purines, ATP, ADP	Nucleotide biosynthesis	6.3.4.4	0	E	0.17258	E	TP	0	E	TP
BCG_0401c	Rv0363c	fructose-bisphosphate aldolase	fba	44, 8	Glycolysis	Carbohydrate metabolism (excluding central metabolism)	4.1.2.13	0.106786	NE	no-data	no-data	no-data	7e-05	E	FN
BCG_0420c	Rv0382c	orotate phosphoribosyltransferase	pyrE	291	Nucleotide biosynthesis, de novo biosynthesis of pyrimidine ribonucleotides	Nucleotide biosynthesis	2.4.2.10	0	E	0.694281	NE	FP	0.00083	E	TP
BCG_0429c	Rv0392c	type II NADH dehydrogenase, ndhA or ndh	ndhA	120	Energy metabolism	Other	1.6.5.3	0.107234	NE	0.834684	NE	TN	0.86574	NE	TN
BCG_0437c	Rv0400c	acyl-CoA dehydrogenase fadE1-36 AND enoyl-CoA hydratase/isomerase echA1-21 AND 3-hydroxyacyl-CoA dehydrogenase fadB2-5 AND acetyl-CoA C-acetyltransferase fadA2-6	fadE7	552, 553, 554, 555, 556, 557, 558, 559, 560, 561, 562, 563, 564, 565, 566, 567, 568, 569, 570, 575, 576, 577, 578, 579, 580, 581, 582	beta oxidation of fatty acids	β oxidation of fatty acids	1.3.99.3 AND 4.2.1.17 AND 1.1.1.35 AND 2.3.1.16	0.107234	NE	0.129425	E	FN	0.49993	NE	TN
BCG_0442	Rv0404	acyl-CoA dehydrogenase fadE1-36 AND enoyl-CoA hydratase/isomerase echA1-21 AND 3-hydroxyacyl-CoA dehydrogenase fadB2-5 AND acetyl-CoA C-acetyltransferase fadA2-11	fadD30	537, 538, 539, 540, 541, 542, 543, 544, 545, 546, 547, 548, 549, 550, 551	beta oxidation of fatty acids	β oxidation of fatty acids	1.3.99.3 AND 4.2.1.17 AND 1.1.1.35 AND 2.3.1.16	0.107234	NE	0.132506	E	FN	0	E	FN
BCG_0447	Rv0408	phosphate acetyltransferase pta	pta	76, 78, 90	Pyruvate metabolism	Other	2.3.1.8	0.0965727	NE	no-data	no-data	no-data	0.16141	NE	TN
BCG_0448	Rv0409	acetate kinase ackA	ackA	75, 79	Pyruvate metabolism	Other	2.7.2.1	0.107097	NE	0.989095	NE	TN	0.86574	NE	TN
BCG_0449c	Rv0410c	serine/threonine-protein kinase PknG	pknG	373	Cofactor biosynthesis, Nicotinamide nucleotides (NAD+, NADP) biosynthesis	Cofactor biosynthesis	2.7.1.-	0.107234	NE	0.132241	E	FN	0	E	FN
BCG_0450c	Rv0411c	L-glutamine binding (glnH) and transport via ABC system (glnQ)	glnH	829, 831	Transport reaction	Transport reaction	-	0.107234	NE	0.100948	E	FN	0.00903	E	FN
BCG_0453c	Rv0414c	2-methyl-4-aminopyridine-5-methenyltransferase, thiE	thiE	472	Cofactor biosynthesis, Thiamine biosynthesis	Cofactor biosynthesis	2.5.1.3	0	E	no-data	no-data	no-data	0.00903	E	TP
BCG_0456	Rv0417	PROBABLE THIAMIN BIOSYNTHESIS PROTEIN THIG	thiG	470	Cofactor biosynthesis, Thiamine biosynthesis	Cofactor biosynthesis	-	0	E	0.0466101	E	TP	0.00026	E	TP
BCG_0461c	Rv0422c	PROBABLE PHOSPHOMETHYLPYRIMIDINE KINASE THID	thiD	468, 469	Cofactor biosynthesis, Thiamine biosynthesis	Cofactor biosynthesis	2.7.1.49 and 2.7.4.7	0	E	0.0856634	E	TP	0.00045	E	TP
BCG_0462c	Rv0423c	thiamine biosynthesis protein ThiC	thiC	467	Cofactor biosynthesis, Thiamine biosynthesis	Cofactor biosynthesis	-	0	E	0.0331619	E	TP	1e-05	E	TP
BCG_0475c	Rv0436c	CDP-diacylglycerol-serine O-phosphatidyltransferase	pssA	589	Phospholipid synthesis, Synthesis of Phosphatidylethanolamine	Lipid biosynthesis	2.7.8.8	0	E	no-data	no-data	no-data	0.03357	E	TP
BCG_0476c	Rv0437c	phosphatidylserine decarboxylase	psd	PE	Phospholipid synthesis, Synthesis of Phosphatidylethanolamine	Lipid biosynthesis	4.1.1.65	0	E	1.08604	NE	FP	0.06177	NE	FP
BCG_0477c	Rv0438c	probably molybdopterin biosynthesis protein moeA1 OR moaA2, N-terminal region	moeA2	463	Cofactor biosynthesis, molybdopterin biosynthesis	Cofactor biosynthesis	-	0.107234	NE	1.09815	NE	TN	0.97648	NE	TN
BCG_0495c	Rv0456c	acyl-CoA dehydrogenase fadE1-36 AND enoyl-CoA hydratase/isomerase echA1-21 AND 3-hydroxyacyl-CoA dehydrogenase fadB2-5 AND acetyl-CoA C-acetyltransferase fadA2-6	echA2	552, 553, 554, 555, 556, 557, 558, 559, 560, 561, 562, 563, 564, 565, 566, 567, 568, 569, 570, 575, 576, 577, 578, 579, 580, 581, 582	beta oxidation of fatty acids	β oxidation of fatty acids	1.3.99.3 AND 4.2.1.17 AND 1.1.1.35 AND 2.3.1.16	0.107234	NE	0.79224	NE	TN	0.93607	NE	TN
BCG_0498	Rv0458	glyceraldehyde dehydrogenase aldC	-	5	C3 compounds, glyceraldehyde	Central carbon metabolism	1.2.1.3	0.105149	NE	1.17893	NE	TN	0.99682	NE	TN
BCG_0502	Rv0462	NADPH-dependent quinone oxidoreductase activity of LpdA - slow compared to NAD pathway	lpd	121, 187	Energy metabolism	Other	1.6.5.2 and 1.8.1.4	0.100413	NE	0.127449	E	FN	0	E	FN
BCG_0507	Rv0467	2-methylisocitrate lyase/isocitrarte lyase ICL1 (aceA or icl gene) or ILC2 (aceAa and aceAb genes)	icl	102, 85	Propanoate metabolism - methycitrate cycle, Glyoxylate shunt	Central carbon metabolism	4.1.3.30	0.107234	NE	no-data	no-data	no-data	0.01897	E	FN
BCG_0508	Rv0468	acyl-CoA dehydrogenase fadE1-36 AND enoyl-CoA hydratase/isomerase echA1-21 AND 3-hydroxyacyl-CoA dehydrogenase fadB2-5 AND acetyl-CoA C-acetyltransferase fadA2-6	fadB2	552, 553, 554, 555, 556, 557, 558, 559, 560, 561, 562, 563, 564, 565, 566, 567, 568, 569, 570, 575, 576, 577, 578, 579, 580, 581, 582	beta oxidation of fatty acids	β oxidation of fatty acids	1.3.99.3 AND 4.2.1.17 AND 1.1.1.35 AND 2.3.1.16	0.107234	NE	2.40659	NE	TN	0.96122	NE	TN
BCG_0519	Rv0478	deoxyribose-phosphate aldolase	deoC	99	Pentose phosphate pathway	Central carbon metabolism	4.1.2.4	0.105149	NE	0.436946	NE	TN	0.77553	NE	TN
BCG_0523	Rv0482	UDP-N-acetylenolpyruvoylglucosamine reductase	murB	719	Peptidoglycan Synthesis, NAG and NAM biosynthesis	Cell wall syntheisis	1.1.1.158	0	E	0.60786	NE	FP	0.0009	E	TP
BCG_0527	Rv0486	glycosyltransferase, mshA	-	480	Cofactor biosynthesis, mycothiol biosynthesis - hyothetical reaction	Cofactor biosynthesis	-	0.107234	NE	no-data	no-data	no-data	0.00656	E	FN
BCG_0530	Rv0489	phosphoglycerate mutase gpm2, gpm1	gpmA	49	Glycolysis	Central carbon metabolism	5.4.2.1	0.107234	NE	no-data	no-data	no-data	0.00153	E	FN
BCG_0542	Rv0500	pyrroline-5-carboxylate reductase proC	proC	202	Amino acid biosynthesis, Glutamate family, Proline	Amino acid metabolism	1.5.1.2	0	E	0.118531	E	TP	0.00083	E	TP
BCG_0544	Rv0501	UDP-glucose 4-epimerase galE1, galE2, galE3	galE2	20	C6 Compounds, Galactose	Carbohydrate metabolism (excluding central metabolism)	5.1.3.2	0.107234	NE	1.96289	NE	TN	0.96172	NE	TN
BCG_0546c	Rv0503c	cyclopropane fatty acyl-phospholipid synthase 2, cmaA2	cmaA2	636	lipid biosynthesis, Synthesis of mycolic acids, SYNTHESIS OF KETO MYCOLATE	Lipid biosynthesis	2.1.1.79	0	E	2.91223	NE	FP	0.99475	NE	FP
BCG_0552	Rv0509	glutamyl-trna reductase, hemA	hemA	429	Cofactor biosynthesis, heme biosynthesis	Cofactor biosynthesis	1.2.1.70	0	E	0.0285323	E	TP	0	E	TP
BCG_0553	Rv0510	porphobilinogen deaminase, hemC	hemC	432	Cofactor biosynthesis, heme biosynthesis	Cofactor biosynthesis	2.5.1.61	0	E	0.0306345	E	TP	0.00166	E	TP
BCG_0554	Rv0511	Probable Homocysteine S-Methyltransferase mmuM, auroporphyrin-iii c-methyltransferase / Uroporphyrinogen-III synthase, cysG, Probable siroheme synthase, cysG2	hemD	433, 440	Amino acid biosynthesis, The aspartate family, Methionine	Amino acid metabolism	2.1.1.10 and 4.2.1.75 and 2.1.1.107	0	E	0.0449212	E	TP	4e-05	E	TP
BCG_0555	Rv0512	delta-aminolevulinic acid dehydratase, hemB	hemB	431	Cofactor biosynthesis, heme biosynthesis	Cofactor biosynthesis	4.2.1.24	0	E	no-data	no-data	no-data	1e-05	E	TP
BCG_0562c	Rv0519c	mycoyltransferase II. activity not demonstrated	-	641	lipid biosynthesis, Synthesis of mycolic acids, MYCOLIC ACID CONDENSATION	Lipid biosynthesis	-	0.107234	NE	0.977612	NE	TN	0.91791	NE	TN
BCG_0567	Rv0524	glutamate-1-semialdehyde 2,1-aminomutase, hemL	hemL	430	Cofactor biosynthesis, heme biosynthesis	Cofactor biosynthesis	5.4.3.8	0	E	0.0505898	E	TP	1e-05	E	TP
BCG_0577c	Rv0533c	beta-ketoacyl-ACP synthase III, fabH	fabH	620	lipid biosynthesis, Synthesis of mycolic acids, FASIIA module	Lipid biosynthesis	2.3.1.41	0	E	1.07471	NE	FP	0.95021	NE	FP
BCG_0578c	Rv0534c	1,4-dihydroxy-2-naphthoate prenyltransferase, menA	menA	417	Cofactor biosynthesis, Menaquinone biosynthesis	Cofactor biosynthesis	2.5.1.-	0	E	0.427082	NE	FP	0.00304	E	TP
BCG_0579	Rv0535	Probable 5'-Methylthioadenosine Phosphorylase PNP	pnp	332	Nucleotide biosynthesis, de novo biosynthesis of pyrimidine ribonucleotides	Nucleotide biosynthesis	2.4.2.28	0	E	no-data	no-data	no-data	0.24771	NE	FP
BCG_0580	Rv0536	UDP-glucose 4-epimerase galE1, galE2, galE3	galE3	20	C6 Compounds, Galactose	Carbohydrate metabolism (excluding central metabolism)	5.1.3.2	0.107234	NE	0.834173	NE	TN	0.95021	NE	TN
BCG_0586c	Rv0542c	o-succinylbenzoate-CoA ligase	menE	415	Cofactor biosynthesis, Menaquinone biosynthesis	Cofactor biosynthesis	6.2.1.26	0	E	0.151521	E	TP	0.00048	E	TP
BCG_0592c	Rv0548c	naphthoate synthase, menB	menB	416	Cofactor biosynthesis, Menaquinone biosynthesis	Cofactor biosynthesis	4.1.3.36	0	E	0.7433	NE	FP	0.0033	E	TP
BCG_0596c	Rv0551c	acyl-CoA dehydrogenase fadE1-36 AND enoyl-CoA hydratase/isomerase echA1-21 AND 3-hydroxyacyl-CoA dehydrogenase fadB2-5 AND acetyl-CoA C-acetyltransferase fadA2-11	fadD8	537, 538, 539, 540, 541, 542, 543, 544, 545, 546, 547, 548, 549, 550, 551	beta oxidation of fatty acids	β oxidation of fatty acids	1.3.99.3 AND 4.2.1.17 AND 1.1.1.35 AND 2.3.1.16	0.107234	NE	1.89154	NE	TN	0.9841	NE	TN
BCG_0598	Rv0553	o-succinylbenzoate synthase and o-succinylbenzoate-CoA ligase	menC	415	Cofactor biosynthesis, Menaquinone biosynthesis	Cofactor biosynthesis	4.2.1.- and 6.2.1.26	0	E	0.183982	E	TP	0.00304	E	TP
BCG_0600	Rv0555	2-succinyl-6-hydroxy-2,4-cyclohexadiene-1-carboxylate synthase	menD	413	Cofactor biosynthesis, Menaquinone biosynthesis	Cofactor biosynthesis	4.1.3.- AND 4.1.1.71	0	E	0.0568609	E	TP	0.00024	E	TP
BCG_0602	Rv0557	alpha-mannosyltransferase, pimB	pimB	602	Phosphatidylinositol mannoside (PIM) synthesis	Lipid biosynthesis	-	0	E	0.168488	E	TP	0.21191	NE	FP
BCG_0607	Rv0562	trans-hexaprenyltranstransferase	grcC1	691	Polyprenoids biosynthesis	Other	2.5.1.30	0	E	0.157352	E	TP	0.00048	E	TP
BCG_0609c	Rv0564	glycerol-3-phosphate dehydrogenase gpdA1	gpsA	591	Phospholipid synthesis, synthesis of phophatidlyglycerol	Lipid biosynthesis	1.1.1.94	0.107234	NE	0.873747	NE	TN	0.95021	NE	TN
BCG_0615	Rv0570	ribonucleoside-diphosphate reductase, nrdZ	nrdZ	298, 331, 353, 360	Nucleotide biosynthesis, de novo biosynthesis of pyrimidine ribonucleotides	Nucleotide biosynthesis	1.17.4.1	0.107234	NE	0.75	NE	TN	0.69	NE	TN
BCG_0618c	Rv0573c	nicotinate phosphoribosyltransferase	-	367	Cofactor biosynthesis, Nicotinamide nucleotides (NAD+, NADP) biosynthesis	Cofactor biosynthesis	2.4.2.11	0.107234	NE	1.14553	NE	TN	0.88157	NE	TN
BCG_0665	Rv0618	UTP-hexose-1-phosphate uridylyltransferase, galTa, galTb	galTa	19	C6 Compounds, Galactose	Carbohydrate metabolism (excluding central metabolism)	2.7.7.10	0.107234	NE	no-data	no-data	no-data	0.8946	NE	TN
BCG_0666	Rv0620	galactokinase, galK	galK	18	C6 Compounds, Galactose	Carbohydrate metabolism (excluding central metabolism)	2.7.1.6	0.107234	NE	0.590188	NE	TN	0.24771	NE	TN
BCG_0679c	Rv0632c	acyl-CoA dehydrogenase fadE1-36 AND enoyl-CoA hydratase/isomerase echA1-21 AND 3-hydroxyacyl-CoA dehydrogenase fadB2-5 AND acetyl-CoA C-acetyltransferase fadA2-6	echA3	552, 553, 554, 555, 556, 557, 558, 559, 560, 561, 562, 563, 564, 565, 566, 567, 568, 569, 570, 575, 576, 577, 578, 579, 580, 581, 582	beta oxidation of fatty acids	β oxidation of fatty acids	1.3.99.3 AND 4.2.1.17 AND 1.1.1.35 AND 2.3.1.16	0.107234	NE	0.653386	NE	TN	0.35774	NE	TN
BCG_0684	Rv0635	beta-hydroxyacylACP dehydrase, HadAB and HadBC	-	622	lipid biosynthesis, Synthesis of mycolic acids, FASIIA module	Lipid biosynthesis	4.2.1.61	0.107234	NE	0.0629024	E	FN	0.00045	E	FN
BCG_0685	Rv0636	beta-hydroxyacylACP dehydrase, HadAB and HadBC	-	622	lipid biosynthesis, Synthesis of mycolic acids, FASIIA module	Lipid biosynthesis	4.2.1.61	0	E	0.136818	E	TP	0.01594	E	TP
BCG_0686	Rv0637	beta-hydroxyacylACP dehydrase, HadAB and HadBC	-	622	lipid biosynthesis, Synthesis of mycolic acids, FASIIA module	Lipid biosynthesis	4.2.1.61	0.107234	NE	0.526457	NE	TN	0.0315	E	FN
BCG_0691c	Rv0642c	methoxymycolic acid synthase 4, mmaA4	mmaA4	631	lipid biosynthesis, Synthesis of mycolic acids, SYNTHESIS OF METHOXY MYCOLATE	Lipid biosynthesis	2.1.1.-	0	E	2.05965	NE	FP	0.01897	E	TP
BCG_0693c	Rv0644c	methxymycolic acid synthase A1, mmaA1	mmaA2	633	lipid biosynthesis, Synthesis of mycolic acids, SYNTHESIS OF KETO MYCOLATE	Lipid biosynthesis	2.1.1.-	0	E	1.35649	NE	FP	0.95021	NE	FP
BCG_0694c	Rv0645c	cyclopropane mycolic synthase synthase A2, cmaA2 plus redox system	mmaA1	634	lipid biosynthesis, Synthesis of mycolic acids, SYNTHESIS OF METHOXY MYCOLATE	Lipid biosynthesis	2.1.1.-	0	E	3.4461	NE	FP	0.99326	NE	FP
BCG_0695c	Rv0646c	Probable Phospholipases	lipG	590	Inositol phosphate metabolism, Glycerophospholipid metabolism	Lipid biosynthesis	3.1.4.3	0.107234	NE	2.83752	NE	TN	0.91791	NE	TN
BCG_0698	Rv0649	fatty acid synthase	fabD2	496, 509, 510, 511, 512, 513, 514, 515, 516, 517, 518, 519, 520, 521, 522, 533, 618, 619	lipid biosynthesis, pathway 1	Lipid biosynthesis	2.3.1.41/1.1.1.100/1.3.1.10	0.107234	NE	0.931246	NE	TN	0.39468	NE	TN
BCG_0699	Rv0650	glucokinase	-	33, 34	Phosphorylation of glucose	Central carbon metabolism	2.7.1.2	0.107234	NE	0.513961	NE	TN	0.77686	NE	TN
BCG_0704	Rv0655	cholesterol uptake (mce4 locus and supAB and mceG)	mkl	932	Transport reaction	Transport reaction	-	0.107234	NE	0.576065	NE	TN	0.84779	NE	TN
BCG_0721	Rv0672	acyl-CoA dehydrogenase fadE1-36 AND enoyl-CoA hydratase/isomerase echA1-21 AND 3-hydroxyacyl-CoA dehydrogenase fadB2-5 AND acetyl-CoA C-acetyltransferase fadA2-6	fadE8	552, 553, 554, 555, 556, 557, 558, 559, 560, 561, 562, 563, 564, 565, 566, 567, 568, 569, 570, 575, 576, 577, 578, 579, 580, 581, 582	beta oxidation of fatty acids	β oxidation of fatty acids	1.3.99.3 AND 4.2.1.17 AND 1.1.1.35 AND 2.3.1.16	0.107234	NE	1.73781	NE	TN	0.34862	NE	TN
BCG_0722	Rv0673	acyl-CoA dehydrogenase fadE1-36 AND enoyl-CoA hydratase/isomerase echA1-21 AND 3-hydroxyacyl-CoA dehydrogenase fadB2-5 AND acetyl-CoA C-acetyltransferase fadA2-6	echA4	552, 553, 554, 555, 556, 557, 558, 559, 560, 561, 562, 563, 564, 565, 566, 567, 568, 569, 570, 575, 576, 577, 578, 579, 580, 581, 582	beta oxidation of fatty acids	β oxidation of fatty acids	1.3.99.3 AND 4.2.1.17 AND 1.1.1.35 AND 2.3.1.16	0.107234	NE	1.16514	NE	TN	0.46741	NE	TN
BCG_0724	Rv0675	acyl-CoA dehydrogenase fadE1-36 AND enoyl-CoA hydratase/isomerase echA1-21 AND 3-hydroxyacyl-CoA dehydrogenase fadB2-5 AND acetyl-CoA C-acetyltransferase fadA2-6	echA5	552, 553, 554, 555, 556, 557, 558, 559, 560, 561, 562, 563, 564, 565, 566, 567, 568, 569, 570, 575, 576, 577, 578, 579, 580, 581, 582	beta oxidation of fatty acids	β oxidation of fatty acids	1.3.99.3 AND 4.2.1.17 AND 1.1.1.35 AND 2.3.1.16	0.107234	NE	0.0662542	E	FN	0.27021	NE	TN
BCG_0743	Rv0694	L-lactate dehydrogenase, lldD1 or lldD2	lldD1 or lldD2	71	Pyruvate metabolism	Central carbon metabolism	1.1.1.27	0.107234	NE	no-data	no-data	no-data	0.67826	NE	TN
BCG_0778c	Rv0728c	phosphoglycerate dehydrogenase	serA2	70	D-lactate dehydrogenase	Central carbon metabolism	1.1.1.95	0.107234	NE	0.245624	NE	TN	0.6768	NE	TN
BCG_0783	Rv0733	adenylate kinase	adk	351	Nucleotide biosynthesis, Purines, ATP, ADP	Nucleotide biosynthesis	2.7.4.3	0	E	no-data	no-data	no-data	0.09086	NE	FP
BCG_0802c	Rv0751c	3-hydroxyacyl-CoA dehydrogenase	mmsB	173	Amino acid degradation, Branched chain amino acids, Valine	Amino acid metabolism	1.1.1.35	0.107234	NE	0.463305	NE	TN	0.86466	NE	TN
BCG_0803c	Rv0752c	acyl-CoA dehydrogenase fadE1-36 AND enoyl-CoA hydratase/isomerase echA1-21 AND 3-hydroxyacyl-CoA dehydrogenase fadB2-5 AND acetyl-CoA C-acetyltransferase fadA2-6	fadE9	552, 553, 554, 555, 556, 557, 558, 559, 560, 561, 562, 563, 564, 565, 566, 567, 568, 569, 570, 575, 576, 577, 578, 579, 580, 581, 582	beta oxidation of fatty acids	β oxidation of fatty acids	1.3.99.3 AND 4.2.1.17 AND 1.1.1.35 AND 2.3.1.16	0.107234	NE	0.752176	NE	TN	0.86574	NE	TN
BCG_0804c	Rv0753c	methylmalonate-semialdehyde dehydrogenase (acylating)	mmsA	174	Amino acid degradation, Branched chain amino acids, Valine	Amino acid metabolism	1.2.1.27	0.107234	NE	0.959282	NE	TN	0.99135	NE	TN
BCG_0809	Rv0757	alkaline phosphatase (phoP & phoR)	phoP	400	Cofactor biosynthesis, Folate biosynthesis	Cofactor biosynthesis	3.1.3.1	0.107234	NE	1.32673	NE	TN	0.01203	E	FN
BCG_0810	Rv0758	alkaline phosphatase (phoP & phoR)	phoR	400	Cofactor biosynthesis, Folate biosynthesis	Cofactor biosynthesis	3.1.3.1	0.107234	NE	0.545742	NE	TN	0.67826	NE	TN
BCG_0813c	Rv0761c	alcohol dehydrogenase adhA, adh, adhE1, adhB	adhB	74	Pyruvate metabolism	Other	1.1.1.1	0.107234	NE	0.813208	NE	TN	0.58605	NE	TN
BCG_0824	Rv0772	phosphoribosylamine-glycine ligase	purD	314	Nucleotide biosynthesis, Purines	Nucleotide biosynthesis	6.3.4.13	0	E	0.679949	NE	FP	0.5875	NE	FP
BCG_0826c	Rv0774c	mycoyltransferase II. activity not demonstrated	-	641	lipid biosynthesis, Synthesis of mycolic acids, MYCOLIC ACID CONDENSATION	Lipid biosynthesis	-	0.107234	NE	0.851895	NE	TN	0.74854	NE	TN
BCG_0829	Rv0777	adenylosuccinate lyase	purB	320, 350	Nucleotide biosynthesis, Purines	Nucleotide biosynthesis	4.3.2.2	0	E	no-data	no-data	no-data	4e-05	E	TP
BCG_0832	Rv0780	phosphoribosylaminoimidazolesuccinocarboxamide synthase, purC	hemH	319	Nucleotide biosynthesis, Purines	Nucleotide biosynthesis	6.3.2.6	0	E	0.149901	E	TP	0	E	TP
BCG_0855	Rv0803	phosphoribosylformylglycinamidine synthase	purL	316	Nucleotide biosynthesis, Purines	Nucleotide biosynthesis	6.3.5.3	0	E	0.0339189	E	TP	0	E	TP
BCG_0860	Rv0808	amidophosphoribosyltransferase	purF	313	Nucleotide biosynthesis, Purines	Nucleotide biosynthesis	2.4.2.14	0	E	0.0842515	E	TP	0	E	TP
BCG_0861	Rv0809	phosphoribosylformylglycinamidine cyclo-ligase	purM	317	Nucleotide biosynthesis, Purines	Nucleotide biosynthesis	6.3.3.1	0	E	0.531497	NE	FP	0.00048	E	TP
BCG_0864	Rv0812	aminodeoxychorismate lyase	-	404	Cofactor biosynthesis, Folate biosynthesis	Cofactor biosynthesis	4.1.3.38	0.107234	NE	no-data	no-data	no-data	0.00014	E	FN
BCG_0871	Rv0819	mycothiol synthase, mshD	-	483	Cofactor biosynthesis, mycothiol biosynthesis	Cofactor biosynthesis	-	0.107234	NE	1.77935	NE	TN	0.0009	E	FN
BCG_0904	Rv0852	acyl-CoA dehydrogenase fadE1-36 AND enoyl-CoA hydratase/isomerase echA1-21 AND 3-hydroxyacyl-CoA dehydrogenase fadB2-5 AND acetyl-CoA C-acetyltransferase fadA2-11	fadD16	537, 538, 539, 540, 541, 542, 543, 544, 545, 546, 547, 548, 549, 550, 551	beta oxidation of fatty acids	β oxidation of fatty acids	1.3.99.3 AND 4.2.1.17 AND 1.1.1.35 AND 2.3.1.16	0.107234	NE	no-data	no-data	no-data	0.61132	NE	TN
BCG_0910c	Rv0858c	succinyldiaminopimelate transaminase argD	-	235	Amino acid biosynthesis, The aspartate family, Lysine	Amino acid metabolism	2.6.1.17	0.107234	NE	2.16288	NE	TN	0.92831	NE	TN
BCG_0911	Rv0859	acyl-CoA dehydrogenase fadE1-36 AND enoyl-CoA hydratase/isomerase echA1-21 AND 3-hydroxyacyl-CoA dehydrogenase fadB2-5 AND acetyl-CoA C-acetyltransferase fadA2-6	fadA	552, 553, 554, 555, 556, 557, 558, 559, 560, 561, 562, 563, 564, 565, 566, 567, 568, 569, 570, 575, 576, 577, 578, 579, 580, 581, 582	beta oxidation of fatty acids	β oxidation of fatty acids	1.3.99.3 AND 4.2.1.17 AND 1.1.1.35 AND 2.3.1.16	0.107234	NE	0.707504	NE	TN	0.6768	NE	TN
BCG_0925	Rv0873	acyl-CoA dehydrogenase fadE1-36 AND enoyl-CoA hydratase/isomerase echA1-21 AND 3-hydroxyacyl-CoA dehydrogenase fadB2-5 AND acetyl-CoA C-acetyltransferase fadA2-6	fadE10	552, 553, 554, 555, 556, 557, 558, 559, 560, 561, 562, 563, 564, 565, 566, 567, 568, 569, 570, 575, 576, 577, 578, 579, 580, 581, 582	beta oxidation of fatty acids	β oxidation of fatty acids	1.3.99.3 AND 4.2.1.17 AND 1.1.1.35 AND 2.3.1.16	0.107234	NE	2.33752	NE	TN	0.98763	NE	TN
BCG_0936c	Rv0884c	phosphoserine transaminase	serC	248	Amino acid biosynthesis, The serine family, Serine	Amino acid metabolism	2.6.1.52	0	E	0.106367	E	TP	0.00166	E	TP
BCG_0938	Rv0886	ferredoxin-NADP reductase fprA, fprB	fprB	133	Energy metabolism	Other	2.7.4.1	0.107234	NE	1.7442	NE	TN	0.33819	NE	TN
BCG_0941c	Rv0889c	citrate synthasev citA, gltA1, gltA2	citA	55	Citrate cycle (TCA cycle)	Central carbon metabolism	2.3.3.1	0.107234	NE	1.33023	NE	TN	0.7782	NE	TN
BCG_0947	Rv0895	triacylglycerol synthase	-	TAG	triglyceride synthesis	Lipid biosynthesis	2.3.1.75	0.107234	NE	1.17629	NE	TN	0.99929	NE	TN
BCG_0948	Rv0896	citrate synthasev citA, gltA1, gltA2	gltA	55	Citrate cycle (TCA cycle)	Central carbon metabolism	2.3.3.1	0.107234	NE	no-data	no-data	no-data	0	E	FN
BCG_0956c	Rv0904c	acetyl-CoA/propionyl-CoA carboxylase carboxytransferase subunit: 6 paralogues in Mtb: accD1, accD2, accD3, accD4, accD5, accD6	accD3	156, 163, 495	Amino acid degradation, Branched chain amino acids, Isoleucine	Amino acid metabolism	6.4.1.4 and 6.4.1.3 and 6.4.1.2	0.107234	NE	1.16511	NE	TN	0.95661	NE	TN
BCG_0957	Rv0905	acyl-CoA dehydrogenase fadE1-36 AND enoyl-CoA hydratase/isomerase echA1-21 AND 3-hydroxyacyl-CoA dehydrogenase fadB2-5 AND acetyl-CoA C-acetyltransferase fadA2-6	echA6	153, 171, 552, 553, 554, 555, 556, 557, 558, 559, 560, 561, 562, 563, 564, 565, 566, 567, 568, 569, 570, 575, 576, 577, 578, 579, 580, 581, 582	beta oxidation of fatty acids	β oxidation of fatty acids	1.3.99.3 AND 4.2.1.17 AND 1.1.1.35 AND 2.3.1.16	0.107234	NE	1.82753	NE	TN	0.71492	NE	TN
BCG_1000c	Rv0946c	glucose-6-phosphate isomerase	pgi	37, 39, 40	Interconversion between glucose-6-phosphate and fructose-6-phosphate	Central carbon metabolism	5.3.1.9	0.10167	NE	0.0561123	E	FN	2e-05	E	FN
BCG_1002c	Rv0948c	chorismate mutase	Rv0948c	282	Amino acid biosynthesis, The aromatic family, Tyrosine and phenylalanine	Amino acid metabolism		0	E	0.95	NE	FP	0.105	NE	FP
BCG_1005c	Rv0951	succinate-CoA ligase	sucC	63	Citrate cycle (TCA cycle)	Central carbon metabolism	6.2.1.5	0.107228	NE	0.0631928	E	FN	0.00013	E	FN
BCG_1006	Rv0952	succinate-CoA ligase	sucD	63	Citrate cycle (TCA cycle)	Central carbon metabolism	6.2.1.5	0.107228	NE	0.166416	E	FN	0.00153	E	FN
BCG_1010	Rv0956	phosphoribosylglycinamide formyltransferase	purN	315	Nucleotide biosynthesis, Purines	Nucleotide biosynthesis	2.1.2.2	0	E	1.48213	NE	FP	0.00096	E	TP
BCG_1011	Rv0957	phosphoribosylaminoimidazolecarboxamide formyltransferase	purH	321, 322	Nucleotide biosynthesis, Purines	Nucleotide biosynthesis	2.1.2.3	0	E	0.0618303	E	TP	0	E	TP
BCG_1025c	Rv0971c	acyl-CoA dehydrogenase fadE1-36 AND enoyl-CoA hydratase/isomerase echA1-21 AND 3-hydroxyacyl-CoA dehydrogenase fadB2-5 AND acetyl-CoA C-acetyltransferase fadA2-6	echA7	552, 553, 554, 555, 556, 557, 558, 559, 560, 561, 562, 563, 564, 565, 566, 567, 568, 569, 570, 575, 576, 577, 578, 579, 580, 581, 582	beta oxidation of fatty acids	β oxidation of fatty acids	1.3.99.3 AND 4.2.1.17 AND 1.1.1.35 AND 2.3.1.16	0.107234	NE	0.735459	NE	TN	0.82622	NE	TN
BCG_1026c	Rv0972c	acyl-CoA dehydrogenase fadE1-36 AND enoyl-CoA hydratase/isomerase echA1-21 AND 3-hydroxyacyl-CoA dehydrogenase fadB2-5 AND acetyl-CoA C-acetyltransferase fadA2-6	fadE12	552, 553, 554, 555, 556, 557, 558, 559, 560, 561, 562, 563, 564, 565, 566, 567, 568, 569, 570, 575, 576, 577, 578, 579, 580, 581, 582	beta oxidation of fatty acids	β oxidation of fatty acids	1.3.99.3 AND 4.2.1.17 AND 1.1.1.35 AND 2.3.1.16	0.107234	NE	no-data	no-data	no-data	0.13364	NE	TN
BCG_1027c	Rv0973c	acetyl/propionyl-CoA carboxylase alpha subunit encoding both biotin carboxylase and BCCP. Three paralogues in Mtb: accA1, accA2, accA3.	accA2	427	Cofactor biosynthesis, biotin biosynthesis	Cofactor biosynthesis	6.3.4.14	0.107234	NE	0.200878	E	FN	0.01257	E	FN
BCG_1028c	Rv0974c	acetyl-CoA/propionyl-CoA carboxylase carboxytransferase subunit: 6 paralogues in Mtb: accD1, accD2, accD3, accD4, accD5, accD6, methylmalonyl-CoA decarboxylase	accD2	80, 156, 163, 495, 80	Amino acid degradation, Branched chain amino acids, Isoleucine	Amino acid metabolism	6.4.1.4 and 6.4.1.3 and 6.4.1.2 and 4.1.1.41	0.107234	NE	no-data	no-data	no-data	0.0769	NE	TN
BCG_1029c	Rv0975c	acyl-CoA dehydrogenase fadE1-36 AND enoyl-CoA hydratase/isomerase echA1-21 AND 3-hydroxyacyl-CoA dehydrogenase fadB2-5 AND acetyl-CoA C-acetyltransferase fadA2-6	fadE13	552, 553, 554, 555, 556, 557, 558, 559, 560, 561, 562, 563, 564, 565, 566, 567, 568, 569, 570, 575, 576, 577, 578, 579, 580, 581, 582	beta oxidation of fatty acids	β oxidation of fatty acids	1.3.99.3 AND 4.2.1.17 AND 1.1.1.35 AND 2.3.1.16	0.107234	NE	1.7803	NE	TN	0.91873	NE	TN
BCG_1048	Rv0993	UTP-glucose-1-phosphate uridylyltransferase, galU	galU	21	C6 Compounds, Galactose	Carbohydrate metabolism (excluding central metabolism)	2.7.7.9	0	E	0.0956508	E	TP	0.00048	E	TP
BCG_1049	Rv0994	probably molybdopterin biosynthesis protein moeA1 OR moaA2, N-terminal region	moeA1	463	Cofactor biosynthesis, molybdopterin biosynthesis	Cofactor biosynthesis	-	0.107234	NE	0.564632	NE	TN	0.82743	NE	TN
BCG_1058	Rv1001	arginine deiminase arcA	arcA	143	Amino acid degradation, Glutamate family, Arginine	Amino acid metabolism	3.5.3.6	0.107234	NE	1.48892	NE	TN	0.92831	NE	TN
BCG_1068	Rv1011	4-(cytidine 5'-diphospho)-2-C-methyl-D-erythritol kinase	ispE	681	Polyprenoids biosynthesis	Other	2.7.1.148	0	E	0.107688	E	TP	0.00083	E	TP
BCG_1074c	Rv1017c	ribose-phosphate diphosphokinase	prsA	287	Nucleotide biosynthesis	Nucleotide biosynthesis	2.7.6.1	0	E	0.127521	E	TP	0.00166	E	TP
BCG_1075c	Rv1018c	glucosamine-1-phosphate N-acetyltransferase, UDP-N-acetylglucosamine-pyrophosphorylase	glmU	717	Peptidoglycan Synthesis, NAG and NAM biosynthesis	Cell wall syntheisis	2.3.1.157 and 2.7.7.23	0	E	0.148298	E	TP	0	E	TP
BCG_1080	Rv1023	phosphopyruvate hydratase	eno	50	Glycolysis	Central carbon metabolism	4.2.1.11	0.0987566	NE	0.130653	E	FN	7e-05	E	FN
BCG_1116	Rv1058	acyl-CoA dehydrogenase fadE1-36 AND enoyl-CoA hydratase/isomerase echA1-21 AND 3-hydroxyacyl-CoA dehydrogenase fadB2-5 AND acetyl-CoA C-acetyltransferase fadA2-11	fadD14	537, 538, 539, 540, 541, 542, 543, 544, 545, 546, 547, 548, 549, 550, 551	beta oxidation of fatty acids	β oxidation of fatty acids	1.3.99.3 AND 4.2.1.17 AND 1.1.1.35 AND 2.3.1.16	0.107234	NE	0.784071	NE	TN	0.37892	NE	TN
BCG_1128c	Rv1070c	acyl-CoA dehydrogenase fadE1-36 AND enoyl-CoA hydratase/isomerase echA1-21 AND 3-hydroxyacyl-CoA dehydrogenase fadB2-5 AND acetyl-CoA C-acetyltransferase fadA2-6	echA8	153, 171, 552, 553, 554, 555, 556, 557, 558, 559, 560, 561, 562, 563, 564, 565, 566, 567, 568, 569, 570, 575, 576, 577, 578, 579, 580, 581, 582	beta oxidation of fatty acids	β oxidation of fatty acids	1.3.99.3 AND 4.2.1.17 AND 1.1.1.35 AND 2.3.1.16	0.107234	NE	1.40017	NE	TN	0.86466	NE	TN
BCG_1129c	Rv1071c	acyl-CoA dehydrogenase fadE1-36 AND enoyl-CoA hydratase/isomerase echA1-21 AND 3-hydroxyacyl-CoA dehydrogenase fadB2-5 AND acetyl-CoA C-acetyltransferase fadA2-6	echA9	552, 553, 554, 555, 556, 557, 558, 559, 560, 561, 562, 563, 564, 565, 566, 567, 568, 569, 570, 575, 576, 577, 578, 579, 580, 581, 582	beta oxidation of fatty acids	β oxidation of fatty acids	1.3.99.3 AND 4.2.1.17 AND 1.1.1.35 AND 2.3.1.16	0.107234	NE	0.672547	NE	TN	0.96122	NE	TN
BCG_1132c	Rv1074c	acyl-CoA dehydrogenase fadE1-36 AND enoyl-CoA hydratase/isomerase echA1-21 AND 3-hydroxyacyl-CoA dehydrogenase fadB2-5 AND acetyl-CoA C-acetyltransferase fadA2-6	fadA3	155, 552, 553, 554, 555, 556, 557, 558, 559, 560, 561, 562, 563, 564, 565, 566, 567, 568, 569, 570, 575, 576, 577, 578, 579, 580, 581, 582	beta oxidation of fatty acids	β oxidation of fatty acids	1.3.99.3 AND 4.2.1.17 AND 1.1.1.35 AND 2.3.1.16	0.103979	NE	1.16896	NE	TN	0.93607	NE	TN
BCG_1134	Rv1076	Probable Phospholipases	lipU	590	Inositol phosphate metabolism, Glycerophospholipid metabolism	Lipid biosynthesis	3.1.4.3	0.107234	NE	1.18509	NE	TN	0.00557	E	FN
BCG_1135	Rv1077	cystathionine beta-synthase cysM2	cbs	257	Amino acid biosynthesis, The serine family, Cysteine	Amino acid metabolism	4.2.1.22	0.107234	NE	2.48472	NE	TN	0.82864	NE	TN
BCG_1137	Rv1079	cystathionine gamma-lyase, cystathionine gamma-synthase	metB	181, 240, 253, 254, 255, 256, 258	Amino acid degradation, The aspartate family, Threonine, Methionine, Cysteine	Amino acid metabolism	4.4.1.1 and 2.5.1.48 and 2.5.1.48	0	E	0.784584	NE	FP	0.2604	NE	FP
BCG_1140	Rv1082	mycothiol conjugate amidase, mca	mca	484b	Cofactor biosynthesis, mycothiol biosynthesis	Cofactor biosynthesis	-	0.107234	NE	1.05861	NE	TN	0.96122	NE	TN
BCG_1144	Rv1086	FPP synthase	-	687	Polyprenoids biosynthesis	Other	2.5.1.10	0	E	0.76619	NE	FP	0.01501	E	TP
BCG_1152c	Rv1092c	pantothenate kinase	coaA	393	Cofactor biosynthesis, Coenzyme-A biosynthesis	Cofactor biosynthesis	2.7.1.33	0	E	0.0924153	E	TP	2e-05	E	TP
BCG_1153	Rv1093	glycine hydroxymethyltransferase glyA, glyA2	glyA	185	Amino acid degradation, The serine family, Glycine	Amino acid metabolism	2.1.2.1	0.107234	NE	no-data	no-data	no-data	0.00045	E	FN
BCG_1158c	Rv1098c	fumarate hydratase	fumC	64	Citrate cycle (TCA cycle)	Central carbon metabolism	4.2.1.2	0	E	0.114684	E	TP	0.00083	E	TP
BCG_1159c	Rv1099c	fructose-bisphosphatase	glpX	43	Gluconeogenesis	Central carbon metabolism	3.1.3.11	0.107234	NE	0.272475	NE	TN	0.0009	E	FN
BCG_1164	Rv1104	Probable Phospholipases	-	590	Inositol phosphate metabolism, Glycerophospholipid metabolism	Lipid biosynthesis	3.1.4.3	0.107234	NE	1.67985	NE	TN	0.29382	NE	TN
BCG_1165	Rv1105	Probable Phospholipases	-	590	Inositol phosphate metabolism, Glycerophospholipid metabolism	Lipid biosynthesis	3.1.4.3	0.107234	NE	0.962885	NE	TN	0.93607	NE	TN
BCG_1166c	Rv1106c	3 β-hydroxysteroid dehydrogenase (hsd)	-	933	cholesterol degradation	Other	1.1.1.145 and 5.3.3.1	0.107234	NE	1.14647	NE	TN	0.89554	NE	TN
BCG_1170	Rv1110	Probable LYTB-Related protein lytB1 & lytB2	ispH	684	Polyprenoids biosynthesis	Other	-	0.107234	NE	no-data	no-data	no-data	0.00045	E	FN
BCG_1182	Rv1121	glucose-6-phosphate 1-dehydrogenase zwf, zwf2	zwf1	87	Pentose phosphate pathway	Central carbon metabolism	1.1.1.49	0.107234	NE	0.964915	NE	TN	0.09156	NE	TN
BCG_1183	Rv1122	phosphogluconate dehydrogenase, gnd1 or gnd2	gnd2	89	Pentose phosphate pathway	Central carbon metabolism	1.1.1.44	0.107234	NE	0.0774932	E	FN	0.00048	E	FN
BCG_1188c	Rv1127c	pyruvate phosphate dikinase ppdK	ppdK	69	Pyruvate metabolism	Central carbon metabolism	2.7.9.1	0.107234	NE	1.09129	NE	TN	0.0732	NE	TN
BCG_1189c	Rv1130	2-methylcitrate dehydrase, prpD	-	83	Propanoate metabolism - methycitrate cycle	Central carbon metabolism	4.2.1.79	0.104043	NE	no-data	no-data	no-data	0.34862	NE	TN
BCG_1192	Rv1131	citrate synthasev citA, gltA1, gltA2	gltA1	55, 82	Citrate cycle (TCA cycle)	Central carbon metabolism	2.3.3.1	0.104043	NE	0.851045	NE	TN	0.65733	NE	TN
BCG_1194c	Rv1133c	methionine synthase (cobalamin-independent) metE	metE	245	Amino acid biosynthesis, The aspartate family, Methionine	Amino acid metabolism		0	E	0.11	E	TP	0	E	TP
BCG_1203c	Rv1141c	acyl-CoA dehydrogenase fadE1-36 AND enoyl-CoA hydratase/isomerase echA1-21 AND 3-hydroxyacyl-CoA dehydrogenase fadB2-5 AND acetyl-CoA C-acetyltransferase fadA2-6	echA11	552, 553, 554, 555, 556, 557, 558, 559, 560, 561, 562, 563, 564, 565, 566, 567, 568, 569, 570, 575, 576, 577, 578, 579, 580, 581, 582, 623, 625, 629	beta oxidation of fatty acids	β oxidation of fatty acids	1.3.99.3 AND 4.2.1.17 AND 1.1.1.35 AND 2.3.1.16	0.107234	NE	1.46785	NE	TN	0.9698	NE	TN
BCG_1204c	Rv1142c	acyl-CoA dehydrogenase fadE1-36 AND enoyl-CoA hydratase/isomerase echA1-21 AND 3-hydroxyacyl-CoA dehydrogenase fadB2-5 AND acetyl-CoA C-acetyltransferase fadA2-6	echA10	552, 553, 554, 555, 556, 557, 558, 559, 560, 561, 562, 563, 564, 565, 566, 567, 568, 569, 570, 575, 576, 577, 578, 579, 580, 581, 582, 623, 625, 629	beta oxidation of fatty acids	β oxidation of fatty acids	1.3.99.3 AND 4.2.1.17 AND 1.1.1.35 AND 2.3.1.16	0.107234	NE	1.8239	NE	TN	0.86466	NE	TN
BCG_1206	Rv1144	3-hydroxyacyl-CoA dehydrogenase	-	154, 173	Amino acid degradation, Branched chain amino acids, Isoleucine	Amino acid metabolism	1.1.1.35	0.107234	NE	1.07948	NE	TN	0.95021	NE	TN
BCG_1233	Rv1170	N-acetyl-1-D-myo-inositol-2-amino-2-deoxy-?-D-glucopyranoside deacetylase, mshB	mshB	481	Cofactor biosynthesis, mycothiol biosynthesis	Cofactor biosynthesis	-	0.107234	NE	0.874724	NE	TN	0.04688	E	FN
BCG_1236	Rv1173	F420 biosynthesis protein, FbiC: Lactyl (2) diphospho-(5')guanosine:7,8-didemethyl-8-hydroxy-5-deazariboflavin 2-phospho-L-lactate transferase	fbiC	477	Cofactor biosynthesis, F420 biosynthesis	Cofactor biosynthesis	-	0.107234	NE	no-data	no-data	no-data	0.0056	E	FN
BCG_1243	Rv1181	mas-like gene, msl3	pks4	672	synthesis of mycolipanoic, mycolipenic (phthienoic), mycolipodienoic acid and polyacyl trehalose	Lipid biosynthesis	-	0.107234	NE	0.497206	NE	TN	0.24426	NE	TN
BCG_1244	Rv1182	mas-like gene, msl4	papA3	673	synthesis of mycolipanoic, mycolipenic (phthienoic), mycolipodienoic acid and polyacyl trehalose	Lipid biosynthesis	-	0.107234	NE	0.199471	E	FN	0.99339	NE	TN
BCG_1245	Rv1183	mas-like gene, msl5	mmpL10	674	synthesis of mycolipanoic, mycolipenic (phthienoic), mycolipodienoic acid and polyacyl trehalose	Lipid biosynthesis	-	0.107234	NE	no-data	no-data	no-data	0.10098	NE	TN
BCG_1247c	Rv1185c	acyl-CoA dehydrogenase fadE1-36 AND enoyl-CoA hydratase/isomerase echA1-21 AND 3-hydroxyacyl-CoA dehydrogenase fadB2-5 AND acetyl-CoA C-acetyltransferase fadA2-11	fadD21	537, 538, 539, 540, 541, 542, 543, 544, 545, 546, 547, 548, 549, 550, 551	beta oxidation of fatty acids	β oxidation of fatty acids	1.3.99.3 AND 4.2.1.17 AND 1.1.1.35 AND 2.3.1.16	0.107234	NE	0.436343	NE	TN	0.98197	NE	TN
BCG_1249	Rv1187	1-pyrroline-5-carboxylate dehydrogenase rocA	rocA	139, 142	Amino acid degradation, Glutamate family, 4-hydroxyproline, Proline	Amino acid metabolism	1.5.1.12	0.106068	NE	0.193457	E	FN	0.01207	E	FN
BCG_1250	Rv1188	Proline dehydrogenase	-	138	Amino acid degradation, Glutamate family, Proline	Amino acid metabolism	1.5.99.8	0.107234	NE	0.189811	E	FN	0.08426	NE	TN
BCG_1253	Rv1193	acyl-CoA dehydrogenase fadE1-36 AND enoyl-CoA hydratase/isomerase echA1-21 AND 3-hydroxyacyl-CoA dehydrogenase fadB2-5 AND acetyl-CoA C-acetyltransferase fadA2-11	fadD36	537, 538, 539, 540, 541, 542, 543, 544, 545, 546, 547, 548, 549, 550, 551	beta oxidation of fatty acids	β oxidation of fatty acids	1.3.99.3 AND 4.2.1.17 AND 1.1.1.35 AND 2.3.1.16	0.107234	NE	0.161201	E	FN	0.28352	NE	TN
BCG_1261c	Rv1201c	2,3,4,5-tetrahydropyridine-2,6-dicarboxylate N-succinyltransferase	-	234	Amino acid biosynthesis, The aspartate family, Lysine	Amino acid metabolism	2.3.1.117	0	E	0.134662	E	TP	0.00279	E	TP
BCG_1262	Rv1202	succinyl-diaminopimelate desuccinylase dapE	dapE	236	Amino acid biosynthesis, The aspartate family, Lysine	Amino acid metabolism	3.5.1.18	0	E	0.0973887	E	TP	0.00014	E	TP
BCG_1266	Rv1206	acyl-CoA dehydrogenase fadE1-36 AND enoyl-CoA hydratase/isomerase echA1-21 AND 3-hydroxyacyl-CoA dehydrogenase fadB2-5 AND acetyl-CoA C-acetyltransferase fadA2-11	fadD6	537, 538, 539, 540, 541, 542, 543, 544, 545, 546, 547, 548, 549, 550, 551	beta oxidation of fatty acids	β oxidation of fatty acids	1.3.99.3 AND 4.2.1.17 AND 1.1.1.35 AND 2.3.1.16	0.107234	NE	0.973139	NE	TN	0.453	NE	TN
BCG_1267	Rv1207	dihydropteroate synthase, DHPS or probable dihydropteroate synthase	folP2	405	Cofactor biosynthesis, Folate biosynthesis	Cofactor biosynthesis	2.5.1.15	0.107234	NE	0.927208	NE	TN	0.71492	NE	TN
BCG_1283	Rv1223	4-hydroxy-2-oxoglutarate aldolase	htrA	141	Glyoxylate shunt	Central carbon metabolism	4.1.3.16	0.106068	NE	0.125531	E	FN	1e-05	E	FN
BCG_1300	Rv1240	malate dehydrogenase	mdh	65	Citrate cycle (TCA cycle)	Central carbon metabolism	1.1.1.37	0.10513	NE	0.686992	NE	TN	0.07631	NE	TN
BCG_1308c	Rv1248c	Alpha-Ketoglutarate decarboxylase kgd (menD, sucA)	kgd	61	Citrate cycle (TCA cycle)	Central carbon metabolism	4.1.1.71	0.107234	NE	0.0452015	E	FN	0	E	FN
BCG_1331c	Rv1272c	ABC transporters	-	TMM	lipid biosynthesis, Synthesis of mycolic acids, MYCOLIC ACID CONDENSATION	Lipid biosynthesis	-	0.107234	NE	1.39728	NE	TN	0.21891	NE	TN
BCG_1332c	Rv1273c	ABC transporters	-	TMM	lipid biosynthesis, Synthesis of mycolic acids, MYCOLIC ACID CONDENSATION	Lipid biosynthesis	-	0.107234	NE	0.584111	NE	TN	0.22511	NE	TN
BCG_1343	Rv1284	carbonic anhydrase	-	425	Cofactor biosynthesis, biotin biosynthesis	Cofactor biosynthesis	4.2.1.1	0.107234	NE	0.133161	E	FN	0.82622	NE	TN
BCG_1344	Rv1285	sulfate adenylyltransferase cysD, GTPase cysN, adenylyl-sulfate kinase, cysNC	cysD	109	Sulfate metabolism	Other	2.7.7.4, 2.7.1.25	0	E	0.0470647	E	TP	0.00013	E	TP
BCG_1345	Rv1286	sulfate adenylyltransferase cysD, GTPase cysN, adenylyl-sulfate kinase, cysNC	cysN	110	Sulfate metabolism	Other	2.7.7.4, 2.7.1.25	0.107234	NE	0.0725492	E	FN	0	E	FN
BCG_1347	Rv1288	mycoyltransferase II. activity not demonstrated	-	641	lipid biosynthesis, Synthesis of mycolic acids, MYCOLIC ACID CONDENSATION	Lipid biosynthesis	-	0.107234	NE	1.79434	NE	TN	0.63652	NE	TN
BCG_1353	Rv1293	diaminopimelate decarboxylase lysA	lysA	238	Amino acid biosynthesis, The aspartate family, Lysine	Amino acid metabolism	4.1.1.20	0	E	0.0269959	E	TP	0	E	TP
BCG_1354	Rv1294	homoserine dehydrogenase thrA	thrA	229	Amino acid biosynthesis, The aspartate family, Threonine	Amino acid metabolism	1.1.1.3	0	E	0.0153169	E	TP	0	E	TP
BCG_1355	Rv1295	threonine synthase thrC	thrC	231	Amino acid biosynthesis, The aspartate family, Threonine	Amino acid metabolism	4.2.99.2	0	E	0.0475128	E	TP	1e-05	E	TP
BCG_1356	Rv1296	homoserine kinase thrB	thrB	230	Amino acid biosynthesis, The aspartate family, Threonine	Amino acid metabolism	2.7.1.39	0	E	0.0646618	E	TP	0.00013	E	TP
BCG_1360	Rv1300	Probable protoporphyrinogen oxidase, hemY' or hemK	hemK	437	Cofactor biosynthesis, heme biosynthesis	Cofactor biosynthesis	1.3.3.4	0.107234	NE	0.0766226	E	FN	0.00045	E	FN
BCG_1364	Rv1304	Complex V: ATP synthase (atpABCDEFGH), Possible Mg2+ Transport P-Type ATPase C MGTC	atpB	128	Energy metabolism	Other	3.6.3.14 and 3.6.3.1	0.0121096	NE	no-data	no-data	no-data	0.00555	E	FN
BCG_1365	Rv1305	Complex V: ATP synthase (atpABCDEFGH), Possible Mg2+ Transport P-Type ATPase C MGTC	atpE	128	Energy metabolism	Other	3.6.3.14 and 3.6.3.1	0.0121096	NE	0.156592	E	FN	0.01594	E	FN
BCG_1366	Rv1306	Complex V: ATP synthase (atpABCDEFGH), Possible Mg2+ Transport P-Type ATPase C MGTC	atpF	128	Energy metabolism	Other	3.6.3.14 and 3.6.3.1	0.0121096	NE	0.0304053	E	FN	0.11883	NE	TN
BCG_1367	Rv1307	Complex V: ATP synthase (atpABCDEFGH), Possible Mg2+ Transport P-Type ATPase C MGTC	atpH	128	Energy metabolism	Other	3.6.3.14 and 3.6.3.1	0.0121096	NE	0.0357872	E	FN	1e-05	E	FN
BCG_1368	Rv1308	Complex V: ATP synthase (atpABCDEFGH), Possible Mg2+ Transport P-Type ATPase C MGTC	atpA	128	Energy metabolism	Other	3.6.3.14 and 3.6.3.1	0.0121096	NE	0.0206658	E	FN	0	E	FN
BCG_1369	Rv1309	Complex V: ATP synthase (atpABCDEFGH), Possible Mg2+ Transport P-Type ATPase C MGTC	atpG	128	Energy metabolism	Other	3.6.3.14 and 3.6.3.1	0.0121096	NE	0.0390679	E	FN	2e-05	E	FN
BCG_1370	Rv1310	Complex V: ATP synthase (atpABCDEFGH), Possible Mg2+ Transport P-Type ATPase C MGTC	atpD	128	Energy metabolism	Other	3.6.3.14 and 3.6.3.1	0.0121096	NE	0.0385664	E	FN	1e-05	E	FN
BCG_1371	Rv1311	Complex V: ATP synthase (atpABCDEFGH), Possible Mg2+ Transport P-Type ATPase C MGTC	atpC	128	Energy metabolism	Other	3.6.3.14 and 3.6.3.1	0.0121096	NE	0.0772299	E	FN	0.22197	NE	TN
BCG_1376	Rv1315	UDP-N-acetylglucosamine enolpyruvoyl transferase : murA	murA	718	Peptidoglycan Synthesis, NAG and NAM biosynthesis	Cell wall syntheisis	2.5.1.7	0	E	0.0563163	E	TP	7e-05	E	TP
BCG_1384c	Rv1322A	4-hydroxyphenylpyruvate dioxygenase	-	191	Amino acid degradation, The aromatic family, Tyrosine	Amino acid metabolism	1.13.11.27	0.107234	NE	1.06412	NE	TN	0.77686	NE	TN
BCG_1385	Rv1323	acyl-CoA dehydrogenase fadE1-36 AND enoyl-CoA hydratase/isomerase echA1-21 AND 3-hydroxyacyl-CoA dehydrogenase fadB2-5 AND acetyl-CoA C-acetyltransferase fadA2-6	fadA4	552, 553, 554, 555, 556, 557, 558, 559, 560, 561, 562, 563, 564, 565, 566, 567, 568, 569, 570, 575, 576, 577, 578, 579, 580, 581, 582	beta oxidation of fatty acids	β oxidation of fatty acids	1.3.99.3 AND 4.2.1.17 AND 1.1.1.35 AND 2.3.1.16	0.107234	NE	0.929801	NE	TN	0.84779	NE	TN
BCG_1398	Rv1336	cysteine synthase cysK, cysM	cysM	251	Amino acid biosynthesis, The serine family, Cysteine	Amino acid metabolism	2.5.1.47	0.107234	NE	2.26805	NE	TN	0.90786	NE	TN
BCG_1400	Rv1338	glutamate racemase, murI	murI	713	Peptidoglycan Synthesis, NAG and NAM biosynthesis	Cell wall syntheisis	5.1.1.3	0	E	no-data	no-data	no-data	0.00014	E	TP
BCG_1407	Rv1345	acyl-CoA dehydrogenase fadE1-36 AND enoyl-CoA hydratase/isomerase echA1-21 AND 3-hydroxyacyl-CoA dehydrogenase fadB2-5 AND acetyl-CoA C-acetyltransferase fadA2-11	fadD33	537, 538, 539, 540, 541, 542, 543, 544, 545, 546, 547, 548, 549, 550, 551	beta oxidation of fatty acids	β oxidation of fatty acids	1.3.99.3 AND 4.2.1.17 AND 1.1.1.35 AND 2.3.1.16	0.107234	NE	0.878702	NE	TN	0.94423	NE	TN
BCG_1408	Rv1346	acyl-CoA dehydrogenase fadE1-36 AND enoyl-CoA hydratase/isomerase echA1-21 AND 3-hydroxyacyl-CoA dehydrogenase fadB2-5 AND acetyl-CoA C-acetyltransferase fadA2-6	fadE14	552, 553, 554, 555, 556, 557, 558, 559, 560, 561, 562, 563, 564, 565, 566, 567, 568, 569, 570, 575, 576, 577, 578, 579, 580, 581, 582	beta oxidation of fatty acids	β oxidation of fatty acids	1.3.99.3 AND 4.2.1.17 AND 1.1.1.35 AND 2.3.1.16	0.107234	NE	no-data	no-data	no-data	0.61132	NE	TN
BCG_1410	Rv1348	ABC transporters	-	TMM	lipid biosynthesis, Synthesis of mycolic acids, MYCOLIC ACID CONDENSATION	Lipid biosynthesis	-	0.107234	NE	0.0644267	E	FN	0.00031	E	FN
BCG_1411	Rv1349	ABC transporters	-	TMM	lipid biosynthesis, Synthesis of mycolic acids, MYCOLIC ACID CONDENSATION	Lipid biosynthesis	-	0.107234	NE	0.0419048	E	FN	1e-05	E	FN
BCG_1412	Rv1350	fas II Module (kasA/B, mabA/fabG1, fabA/fab2, inhA)	fabG	621, 624, 625, 626, 628, 629, 630	lipid biosynthesis, Synthesis of mycolic acids, FASIIA module	Lipid biosynthesis	2.3.1.41 and 1.1.1.100 and 2.1.1.-	0.107234	NE	0.195495	E	FN	0.37774	NE	TN
BCG_1434	Rv1373	sulfotransferase	-	668	sulfolipid-1 (SL-1) synthesis, trehalose sulfate (TRE-S) synthesis	Lipid biosynthesis	-	0.107234	NE	1.4904	NE	TN	0.99135	NE	TN
BCG_1441	Rv1380	aspartate carbamoyltransferase	pyrB	288	Nucleotide biosynthesis, de novo biosynthesis of pyrimidine ribonucleotides	Nucleotide biosynthesis	2.1.3.2	0	E	0.0408011	E	TP	0.00083	E	TP
BCG_1442	Rv1381	dihydroorotase	pyrC	289	Nucleotide biosynthesis, de novo biosynthesis of pyrimidine ribonucleotides	Nucleotide biosynthesis	3.5.2.3	0	E	0.0448105	E	TP	0.00279	E	TP
BCG_1444	Rv1383	carbamoyl-phosphate synthase (small chain carA and large chain carB)	carA	208	Amino acid biosynthesis, Glutamate family, Arginine	Amino acid metabolism	6.3.5.5	0	E	0.0286427	E	TP	0.00083	E	TP
BCG_1445	Rv1384	carbamoyl-phosphate synthase (small chain carA and large chain carB)	carB	208	Amino acid biosynthesis, Glutamate family, Arginine	Amino acid metabolism	6.3.5.5	0	E	no-data	no-data	no-data	0	E	TP
BCG_1446	Rv1385	orotidine-5'-phosphate decarboxylase	pyrF	292	Nucleotide biosynthesis, de novo biosynthesis of pyrimidine ribonucleotides	Nucleotide biosynthesis	4.1.1.23	0	E	no-data	no-data	no-data	0.05426	NE	FP
BCG_1450	Rv1389	guanylate kinase	gmk	327, 328, 357	Nucleotide biosynthesis, Purines	Nucleotide biosynthesis	2.7.4.8	0	E	0.0699305	E	TP	0.04669	E	TP
BCG_1452	Rv1391	phosphopantothenate—cysteine ligase, coaB (bifunctional protein), phosphopantothenoyl cysteine decarboxylase, coaB (bifunctional protein)	dfp	394, 395	Cofactor biosynthesis, Coenzyme-A biosynthesis	Cofactor biosynthesis	6.3.2.5 and 4.1.1.36	0	E	0.0895346	E	TP	1e-05	E	TP
BCG_1453	Rv1392	methionine adenosyltransferase metK	metK	259	Amino acid biosynthesis, The serine family, Cysteine	Amino acid metabolism	2.5.1.6	0	E	0.0742648	E	TP	2e-05	E	TP
BCG_1460	Rv1399c	Probable Phospholipases	lipH	590	Inositol phosphate metabolism, Glycerophospholipid metabolism	Lipid biosynthesis	3.1.4.3	0.107234	NE	1.09852	NE	TN	0.98168	NE	TN
BCG_1461c	Rv1400c	Probable Phospholipases	lipI	590	Inositol phosphate metabolism, Glycerophospholipid metabolism	Lipid biosynthesis	3.1.4.3	0.107234	NE	1.32879	NE	TN	0.01798	E	FN
BCG_1470	Rv1409	diaminohydroxyphosphoribosylaminopyrimidine deaminase ribD, ribG	ribG	382	Cofactor biosynthesis, Riboflavin (vitamin B2), FMN and FAD biosynthesis	Cofactor biosynthesis	3.5.4.26	0.107234	NE	0.153198	E	FN	0.0009	E	FN
BCG_1473	Rv1412	6,7-dimethyl-8-ribityllumazine synthase and riboflavin synthase	ribC	387	Cofactor biosynthesis, Riboflavin (vitamin B2), FMN and FAD biosynthesis	Cofactor biosynthesis	2.5.1.9	0	E	0.333846	NE	FP	0.05426	NE	FP
BCG_1476	Rv1415	GTP cyclohydrolase II ribA2, ribA2	ribA2	381	Cofactor biosynthesis, Riboflavin (vitamin B2), FMN and FAD biosynthesis	Cofactor biosynthesis	3.5.4.25	0.107234	NE	0.166938	E	FN	0.00024	E	FN
BCG_1477	Rv1416	6,7-dimethyl-8-ribityllumazine synthase and riboflavin synthase	ribH	386	Cofactor biosynthesis, Riboflavin (vitamin B2), FMN and FAD biosynthesis	Cofactor biosynthesis	2.5.1.9	0	E	0.0410041	E	TP	0.11883	NE	FP
BCG_1486	Rv1425	triacylglycerol synthase	-	TAG	triglyceride synthesis	Lipid biosynthesis	2.3.1.75	0.107234	NE	0.716093	NE	TN	0.90786	NE	TN
BCG_1487c	Rv1426c	Probable Phospholipases	lipO	590	Inositol phosphate metabolism, Glycerophospholipid metabolism	Lipid biosynthesis	3.1.4.3	0.107234	NE	0.382089	NE	TN	0.60035	NE	TN
BCG_1488c	Rv1427c	acyl-CoA dehydrogenase fadE1-36 AND enoyl-CoA hydratase/isomerase echA1-21 AND 3-hydroxyacyl-CoA dehydrogenase fadB2-5 AND acetyl-CoA C-acetyltransferase fadA2-11	fadD12	537, 538, 539, 540, 541, 542, 543, 544, 545, 546, 547, 548, 549, 550, 551	beta oxidation of fatty acids	β oxidation of fatty acids	1.3.99.3 AND 4.2.1.17 AND 1.1.1.35 AND 2.3.1.16	0.107234	NE	no-data	no-data	no-data	0.71635	NE	TN
BCG_1497	Rv1436	glyceraldehyde-3-phosphate dehydrogenase	gap	46	Glycolysis	Central carbon metabolism	1.2.1.12	0.102427	NE	0.192819	E	FN	0.00024	E	FN
BCG_1498	Rv1437	phosphoglycerate kinase	pgk	48	Glycolysis	Central carbon metabolism	2.7.2.3	0.102427	NE	0.0441822	E	FN	0.00013	E	FN
BCG_1499	Rv1438	triose-phosphate isomerase	tpiA	45	Glycolysis	Central carbon metabolism	5.3.1.1	0.102336	NE	0.0539009	E	FN	0.00013	E	FN
BCG_1506c	Rv1445c	6-phosphogluconolactonase	devB	88	Pentose phosphate pathway	Central carbon metabolism	3.1.1.31	0.107234	NE	0.283986	NE	TN	0.46741	NE	TN
BCG_1508c	Rv1447c	glucose-6-phosphate 1-dehydrogenase zwf, zwf2	zwf2	87	Pentose phosphate pathway	Central carbon metabolism	1.1.1.49	0.107234	NE	0.429765	NE	TN	0.46875	NE	TN
BCG_1509c	Rv1448c	transaldolase tal	tal	97	Pentose phosphate pathway	Central carbon metabolism	2.2.1.2	0.0967519	NE	0.141318	E	FN	0.3371	NE	TN
BCG_1510c	Rv1449c	transketolase, transaldolase	tkt	93, 94, 95, 96	Pentose phosphate pathway	Central carbon metabolism	2.2.1.1	0	E	0.0404534	E	TP	0	E	TP
BCG_1512	Rv1451	aa3-type cytochrome c oxidase, ctaCDE AND cytochrome bc1	ctaB	126	Energy metabolism	Other	1.10.3.-	0.0936986	NE	0.659793	NE	TN	0.00013	E	FN
BCG_1517c	Rv1456c	aa3-type cytochrome c oxidase, ctaCDE AND cytochrome bc1	-	126	Energy metabolism	Other	1.10.3.-	0.0936986	NE	0.131324	E	FN	0.0009	E	FN
BCG_1525	Rv1464	cysteine desulfhydrase	csd	189, 411	Amino acid degradation, The serine family, cysteine	Amino acid metabolism	4.4.1.- and 2.8.1.7	0.107234	NE	0.0336575	E	FN	0.00024	E	FN
BCG_1528c	Rv1467c	acyl-CoA dehydrogenase fadE1-36 AND enoyl-CoA hydratase/isomerase echA1-21 AND 3-hydroxyacyl-CoA dehydrogenase fadB2-5 AND acetyl-CoA C-acetyltransferase fadA2-6	fadE15	552, 553, 554, 555, 556, 557, 558, 559, 560, 561, 562, 563, 564, 565, 566, 567, 568, 569, 570, 575, 576, 577, 578, 579, 580, 581, 582	beta oxidation of fatty acids	β oxidation of fatty acids	1.3.99.3 AND 4.2.1.17 AND 1.1.1.35 AND 2.3.1.16	0.107234	NE	0.96127	NE	TN	0.82864	NE	TN
BCG_1533	Rv1472	acyl-CoA dehydrogenase fadE1-36 AND enoyl-CoA hydratase/isomerase echA1-21 AND 3-hydroxyacyl-CoA dehydrogenase fadB2-5 AND acetyl-CoA C-acetyltransferase fadA2-6	echA12	153, 171, 552, 553, 554, 555, 556, 557, 558, 559, 560, 561, 562, 563, 564, 565, 566, 567, 568, 569, 570, 575, 576, 577, 578, 579, 580, 581, 582	beta oxidation of fatty acids	β oxidation of fatty acids	1.3.99.3 AND 4.2.1.17 AND 1.1.1.35 AND 2.3.1.16	0.107234	NE	1.36906	NE	TN	0.98168	NE	TN
BCG_1537c	Rv1475c	Aconitase	acn	56, 57, 84	Citrate cycle (TCA cycle)	Central carbon metabolism	4.2.1.3 and 4.2.1.99	0.103969	NE	0.0264101	E	FN	0	E	FN
BCG_1545	Rv1483	fas II Module (kasA/B, mabA/fabG1, fabA/fab2, inhA)	fabG1	621, 624, 625, 626, 628, 629, 630	lipid biosynthesis, Synthesis of mycolic acids, FASIIA module	Lipid biosynthesis	2.3.1.41 and 1.1.1.100 and 2.1.1.-	0.107234	NE	0.788159	NE	TN	0.00083	E	FN
BCG_1546	Rv1484	fas II Module (kasA/B, mabA/fabG1, fabA/fab2, inhA)	inhA	624, 626, 628, 630	lipid biosynthesis, Synthesis of mycolic acids, FASIIA module	Lipid biosynthesis	2.3.1.41 and 1.1.1.100 and 2.1.1.-	0	E	0.385882	NE	FP	0.00505	E	TP
BCG_1547	Rv1485	ferrochelatase, hemZ	hemH	438	Cofactor biosynthesis, heme biosynthesis	Cofactor biosynthesis	4.99.1.1	0	E	0.0440509	E	TP	0	E	TP
BCG_1555	Rv1492	methylmalonyl-CoA mutase (small subunit mutA AND large subunit mutB)	mutA	158, 159	Amino acid degradation, Branched chain amino acids, Isoleucine	Amino acid metabolism	5.4.99.2	0.107234	NE	1.13818	NE	TN	0.65733	NE	TN
BCG_1556	Rv1493	methylmalonyl-CoA mutase (small subunit mutA AND large subunit mutB)	mutB	158, 159	Amino acid degradation, Branched chain amino acids, Isoleucine	Amino acid metabolism	5.4.99.2	0.107234	NE	0.503131	NE	TN	0.22511	NE	TN
BCG_1560	Rv1497	Probable Phospholipases	lipL	590	Inositol phosphate metabolism, Glycerophospholipid metabolism	Lipid biosynthesis	3.1.4.3	0.107234	NE	1.28051	NE	TN	0.65733	NE	TN
BCG_1564	Rv1500	alpha-mannosyltransferase, pimF	Rv1500	613	Phosphatidylinositol mannoside (PIM) synthesis	Lipid biosynthesis		0	E	0.61	NE	FP	0.009	E	TP
BCG_1573	Rv1521	acyl-CoA dehydrogenase fadE1-36 AND enoyl-CoA hydratase/isomerase echA1-21 AND 3-hydroxyacyl-CoA dehydrogenase fadB2-5 AND acetyl-CoA C-acetyltransferase fadA2-11	fadD25	537, 538, 539, 540, 541, 542, 543, 544, 545, 546, 547, 548, 549, 550, 551	beta oxidation of fatty acids	β oxidation of fatty acids	1.3.99.3 AND 4.2.1.17 AND 1.1.1.35 AND 2.3.1.16	0.107234	NE	0.579868	NE	TN	0.46161	NE	TN
BCG_1577	Rv1525	Rhamnosyl transferase wbbL, wbbL2		701	synthesis of arabinogalactan (incomplete)	Cell wall syntheisis		0.107234	NE	no-data	no-data	no-data	0.023	E	FN
BCG_1581	Rv1529	acyl-CoA dehydrogenase fadE1-36 AND enoyl-CoA hydratase/isomerase echA1-21 AND 3-hydroxyacyl-CoA dehydrogenase fadB2-5 AND acetyl-CoA C-acetyltransferase fadA2-11	fadD24	537, 538, 539, 540, 541, 542, 543, 544, 545, 546, 547, 548, 549, 550, 551	beta oxidation of fatty acids	β oxidation of fatty acids	1.3.99.3 AND 4.2.1.17 AND 1.1.1.35 AND 2.3.1.16	0.107234	NE	0.617562	NE	TN	0.25538	NE	TN
BCG_1582	Rv1530	alcohol dehydrogenase adhA, adh, adhE1, adhB	adh	74	Pyruvate metabolism	Other	1.1.1.1	0.107234	NE	no-data	no-data	no-data	0.54645	NE	TN
BCG_1590c	Rv1538c	asparaginase ansA	ansA	177	Amino acid degradation, The aspartate family, Asparagine	Amino acid metabolism	3.5.1.1	0.107234	NE	1.09385	NE	TN	0.00045	E	FN
BCG_1603	Rv1551	glycerol-3-phosphate O-acyltransferase plsB1	plsB1	583	Phospholipid synthesis, Synthesis of Phosphatidylethanolamine	Lipid biosynthesis	2.3.1.15	0.107234	NE	0.97206	NE	TN	0.23126	NE	TN
BCG_1604	Rv1552	probable succinate dehydrogenase, sdhABCD OR probable fumarate reductase, frdABCD	frdA	123	Energy metabolism	Central carbon metabolism	1.3.99.1	0.107234	NE	no-data	no-data	no-data	0.27875	NE	TN
BCG_1605	Rv1553	probable succinate dehydrogenase, sdhABCD OR probable fumarate reductase, frdABCD	frdB	123	Energy metabolism	Central carbon metabolism	1.3.99.1	0.107234	NE	1.12731	NE	TN	0.82743	NE	TN
BCG_1606	Rv1554	probable succinate dehydrogenase, sdhABCD OR probable fumarate reductase, frdABCD	frdC	123	Energy metabolism	Central carbon metabolism	1.3.99.1	0.107234	NE	0.68195	NE	TN	0.71492	NE	TN
BCG_1611	Rv1559	threonine ammonia-lyase	ilvA	215	Amino acid biosynthesis, Branched chain amino acids, Isoleucine	Amino acid metabolism	4.2.1.16	0.107234	NE	no-data	no-data	no-data	0	E	FN
BCG_1621	Rv1568	probable adenosylmethionine-8-amino-7-oxononanoate amino transferase bioA	bioA	421	Cofactor biosynthesis, biotin biosynthesis	Cofactor biosynthesis	2.6.1.62	0.107234	NE	1.26742	NE	TN	0.00013	E	FN
BCG_1622	Rv1569	probable-8-amino-7-oxononanoate synthase bioF1, bioF2	bioF1	420	Cofactor biosynthesis, biotin biosynthesis	Cofactor biosynthesis	2.3.1.47	0.107234	NE	1.03584	NE	TN	0.35661	NE	TN
BCG_1623	Rv1570	probable dethiobiotin synthase bioD	bioD	423	Cofactor biosynthesis, biotin biosynthesis	Cofactor biosynthesis	6.3.3.3	0.107234	NE	0.301778	NE	TN	0.22197	NE	TN
BCG_1627	Rv1589	biotin synthase bioB	bioB	424	Cofactor biosynthesis, biotin biosynthesis	Cofactor biosynthesis	2.8.1.6	0.107234	NE	1.22677	NE	TN	0.00555	E	FN
BCG_1632	Rv1594	quinolinate synthase	nadA	364	Cofactor biosynthesis, Nicotinamide nucleotides (NAD+, NADP) biosynthesis	Cofactor biosynthesis	2.5.1.72	0	E	0.0610232	E	TP	0.00505	E	TP
BCG_1633	Rv1595	L-aspartate oxidase	nadB	362, 363	Cofactor biosynthesis, Nicotinamide nucleotides (NAD+, NADP) biosynthesis	Cofactor biosynthesis	1.4.3.16	0	E	0.0682936	E	TP	0	E	TP
BCG_1634	Rv1596	nicotinate-nucleotide diphosphorylase	nadC	365	Cofactor biosynthesis, Nicotinamide nucleotides (NAD+, NADP) biosynthesis	Cofactor biosynthesis	2.4.2.19	0	E	no-data	no-data	no-data	0.00096	E	TP
BCG_1637	Rv1599	histidinol dehydrogenase hisD	hisD	269	Amino acid biosynthesis, The histidine family, Histidine	Amino acid metabolism	1.1.1.23	0	E	0.0362235	E	TP	7e-05	E	TP
BCG_1638	Rv1600	histidinol-phosphate transaminase hisC, hisC2	hisC1	267	Amino acid biosynthesis, The histidine family, Histidine	Amino acid metabolism	2.6.1.9	0.107234	NE	0.0445314	E	FN	0	E	FN
BCG_1639	Rv1601	imidazole glycerol-phosphate dehydratase, histidinol-phosphatase	hisB	266, 268	Amino acid biosynthesis, The histidine family, Histidine	Amino acid metabolism	4.2.1.19 and 3.1.3.15	0	E	0.0210551	E	TP	0.00024	E	TP
BCG_1640	Rv1602	amidotransferase	hisH	265	Amino acid biosynthesis, The histidine family, Histidine	Amino acid metabolism		0	E	0.03	E	TP	0.006	E	TP
BCG_1641	Rv1603	1-(5-phosphoribosyl)-5-[(5-phosphoribosylamino)methylideneamino]imidazole-4-carboxamide isomerase	hisA	264, 279	Amino acid biosynthesis, The histidine family, Histidine	Amino acid metabolism	5.3.1.16 and 5.3.1.24	0	E	0.0904712	E	TP	0.01003	E	TP
BCG_1644	Rv1606	phosphoribosyl-AMP cyclohydrolase	hisI	263	Amino acid biosynthesis, The histidine family, Histidine	Amino acid metabolism	3.5.4.19	0	E	0.1432	E	TP	0.01791	E	TP
BCG_1647	Rv1609	anthranilate synthase trpE, trpG	trpE	277	Amino acid biosynthesis, The aromatic family, Tryptophan biosynthesis	Amino acid metabolism	4.1.3.27	0	E	0.0253771	E	TP	0	E	TP
BCG_1649	Rv1611	indole-3-glycerol-phosphate synthase trpC	trpC	280	Amino acid biosynthesis, The aromatic family, Tryptophan biosynthesis	Amino acid metabolism	4.1.1.48	0	E	0.0158872	E	TP	0.00153	E	TP
BCG_1650	Rv1612	tryptophan synthase trpA, trpB	trpB	281	Amino acid biosynthesis, The aromatic family, Tryptophan biosynthesis	Amino acid metabolism	4.2.1.20	0	E	0.0304331	E	TP	4e-05	E	TP
BCG_1651	Rv1613	tryptophan synthase trpA, trpB	trpA	281	Amino acid biosynthesis, The aromatic family, Tryptophan biosynthesis	Amino acid metabolism	4.2.1.20	0	E	0.0314895	E	TP	2e-05	E	TP
BCG_1655	Rv1617	pyruvate kinase	pykA	51	Glycolysis	Central carbon metabolism	2.7.1.40	0.107234	NE	0.0849474	E	FN	0.0009	E	FN
BCG_1660	Rv1622c	aa3-type cytochrome c oxidase, ctaCDE AND cytochrome bc1 Or bd-type menaquinol oxidase, bd-type menaquinol oxidase	cydB	125, 126, 127	Energy metabolism	Other	1.10.3.-	0	E	0.176548	E	TP	0.04322	E	TP
BCG_1661c	Rv1623c	aa3-type cytochrome c oxidase, ctaCDE AND cytochrome bc1 Or bd-type menaquinol oxidase, bd-type menaquinol oxidase	cydA	125, 126, 127	Energy metabolism	Other	1.10.3.-	0	E	0.946281	NE	FP	0.02292	E	TP
BCG_1663c	Rv1625c	adenylate cyclase	cya	323	Nucleotide biosynthesis, Purines	Nucleotide biosynthesis	4.6.1.1	0.107234	NE	2.28454	NE	TN	0.85815	NE	TN
BCG_1669	Rv1631	dephospho-CoA kinase	coaE	397	Cofactor biosynthesis, Coenzyme-A biosynthesis	Cofactor biosynthesis	2.7.1.24	0	E	0.0796341	E	TP	0.00153	E	TP
BCG_1691	Rv1652	N-acetyl-gamma-glutamyl-phosphate reductase	argC	205	Amino acid biosynthesis, Glutamate family, Arginine	Amino acid metabolism	1.2.1.38	0	E	0.0537029	E	TP	0.00024	E	TP
BCG_1692	Rv1653	N-acetylglutamate synthase, argA, glutamate N-acetyltransferase	argJ	203, 207	Amino acid biosynthesis, Glutamate family, Arginine	Amino acid metabolism	2.3.1.1 AND 2.3.1.35	0	E	0.121872	E	TP	0.14626	NE	FP
BCG_1693	Rv1654	acetylglutamate kinase	argB	204	Amino acid biosynthesis, Glutamate family, Arginine	Amino acid metabolism	2.7.2.8	0	E	0.0373959	E	TP	0.11883	NE	FP
BCG_1694	Rv1655	acetonitrile aminotransferase	argD	206	Amino acid biosynthesis, Glutamate family, Arginine	Amino acid metabolism	2.6.1.11	0	E	0.0225463	E	TP	0.00505	E	TP
BCG_1695	Rv1656	ornithine carbamoyltransferase	argF	145	Amino acid degradation, Glutamate family, Arginine	Amino acid metabolism	2.1.3.3	0	E	0.0387595	E	TP	0.07631	NE	FP
BCG_1697	Rv1658	argininosuccinate synthase	argG	209	Amino acid biosynthesis, Glutamate family, Arginine	Amino acid metabolism	6.3.4.5	0	E	0.044863	E	TP	4e-05	E	TP
BCG_1698	Rv1659	argininosuccinate lyase	argH	210	Amino acid biosynthesis, Glutamate family, Arginine	Amino acid metabolism	4.3.2.1	0	E	0.0683971	E	TP	0.01594	E	TP
BCG_1700	Rv1661	phenolpthiocerol synthase ppsA - ppsE, fadD26, fadD28, pks7	pks7	656	Synthesis of Phthiocerol and Phenolphthiocerol, phenolpthiocerol (PPTC) synthesis	Lipid biosynthesis	-	0.107234	NE	0.0822736	E	FN	8e-05	E	FN
BCG_1717	Rv1679	acyl-CoA dehydrogenase fadE1-36 AND enoyl-CoA hydratase/isomerase echA1-21 AND 3-hydroxyacyl-CoA dehydrogenase fadB2-5 AND acetyl-CoA C-acetyltransferase fadA2-6	fadE16	552, 553, 554, 555, 556, 557, 558, 559, 560, 561, 562, 563, 564, 565, 566, 567, 568, 569, 570, 575, 576, 577, 578, 579, 580, 581, 582	beta oxidation of fatty acids	β oxidation of fatty acids	1.3.99.3 AND 4.2.1.17 AND 1.1.1.35 AND 2.3.1.16	0.107234	NE	no-data	no-data	no-data	0.49993	NE	TN
BCG_1724c	Rv1686c	ABC transporters	-	TMM	lipid biosynthesis, Synthesis of mycolic acids, MYCOLIC ACID CONDENSATION	Lipid biosynthesis	-	0.107234	NE	no-data	no-data	no-data	0.1993	NE	TN
BCG_1725c	Rv1687c	ABC transporters	-	TMM	lipid biosynthesis, Synthesis of mycolic acids, MYCOLIC ACID CONDENSATION	Lipid biosynthesis	-	0.107234	NE	1.76564	NE	TN	0.7782	NE	TN
BCG_1733	Rv1695	NAD kinase	ppnK	377	Cofactor biosynthesis, Nicotinamide nucleotides (NAD+, NADP) biosynthesis	Cofactor biosynthesis	2.7.1.23	0	E	0.0396434	E	TP	0.01594	E	TP
BCG_1737	Rv1699	CTP synthase	pyrG	295, 296	Nucleotide biosynthesis, de novo biosynthesis of pyrimidine ribonucleotides	Nucleotide biosynthesis	6.3.4.2	0	E	0.0403587	E	TP	0	E	TP
BCG_1751	Rv1712	cytidylate kinase	cmk	293, 307, 309	Nucleotide biosynthesis, Pyrimidines	Nucleotide biosynthesis	2.7.4.14	0	E	0.072197	E	TP	0.00083	E	TP
BCG_1754	Rv1715	acyl-CoA dehydrogenase fadE1-36 AND enoyl-CoA hydratase/isomerase echA1-21 AND 3-hydroxyacyl-CoA dehydrogenase fadB2-5 AND acetyl-CoA C-acetyltransferase fadA2-6	fadB3	552, 553, 554, 555, 556, 557, 558, 559, 560, 561, 562, 563, 564, 565, 566, 567, 568, 569, 570, 575, 576, 577, 578, 579, 580, 581, 582	beta oxidation of fatty acids	β oxidation of fatty acids	1.3.99.3 AND 4.2.1.17 AND 1.1.1.35 AND 2.3.1.16	0.107234	NE	0.174779	E	FN	0.71492	NE	TN
BCG_1770	Rv1731	succinate-semialdehyde dehydrogenase gabD1, gabD2	gabD2	137	Amino acid degradation, Glutamate family, Glutamate	Amino acid metabolism	2.6.1.19	0.107234	NE	1.37879	NE	TN	0.79299	NE	TN
BCG_1784c	Rv1745c	isopentenyl-diphosphate D-isomerase	idi	685	Polyprenoids biosynthesis	Other	5.3.3.2	0	E	0.717603	NE	FP	0.3371	NE	FP
BCG_1786	Rv1747	ABC transporters	-	TMM	lipid biosynthesis, Synthesis of mycolic acids, MYCOLIC ACID CONDENSATION	Lipid biosynthesis	-	0.107234	NE	0.851963	NE	TN	0.98598	NE	TN
BCG_1789c	Rv1750c	acyl-CoA dehydrogenase fadE1-36 AND enoyl-CoA hydratase/isomerase echA1-21 AND 3-hydroxyacyl-CoA dehydrogenase fadB2-5 AND acetyl-CoA C-acetyltransferase fadA2-11	fadD1	537, 538, 539, 540, 541, 542, 543, 544, 545, 546, 547, 548, 549, 550, 551	beta oxidation of fatty acids	β oxidation of fatty acids	1.3.99.3 AND 4.2.1.17 AND 1.1.1.35 AND 2.3.1.16	0.107234	NE	2.83421	NE	TN	0.71777	NE	TN
BCG_1801	Rv1760	triacylglycerol synthase	-	TAG	triglyceride synthesis	Lipid biosynthesis	2.3.1.75	0.107234	NE	3.72454	NE	TN	0.5875	NE	TN
BCG_1845	Rv1811	Possible Mg2+ Transport P-Type ATPase C MGTC	mgtC	129	Energy metabolism	Other		0	E	1.161	NE	FP	0.982	NE	FP
BCG_1854c	Rv1819c	ABC transporters	-	TMM	lipid biosynthesis, Synthesis of mycolic acids, MYCOLIC ACID CONDENSATION	Lipid biosynthesis	-	0.107234	NE	1.2221	NE	TN	0.98598	NE	TN
BCG_1855	Rv1820	acetolactate synthase	ilvG	216	Amino acid biosynthesis, Branched chain amino acids, Valine	Amino acid metabolism	2.2.1.6 and 4.1.3.18	0.107234	NE	2.61447	NE	TN	0.99326	NE	TN
BCG_1857	Rv1822	cardiolipin synthase	pgsA2	CL, 22	Phospholipid synthesis, synthesis of cardiolipin	Amino acid metabolism	2.7.8.-	0.107234	NE	no-data	no-data	no-data	0.00014	E	FN
BCG_1867	Rv1832	glycine dehydrogenase gcvB	gcvB	186	Amino acid degradation, The serine family, Glycine	Amino acid metabolism	1.4.4.2	0.104263	NE	0.0468731	E	FN	0	E	FN
BCG_1872c	Rv1837c	malate synthase	glcB	103	Glyoxylate shunt	Central carbon metabolism	2.3.3.9	0.106067	NE	0.413914	NE	TN	0	E	FN
BCG_1879c	Rv1843c	IMP dehydrogenase guaB1, guaB2, guaB3	guaB1	355	Nucleotide biosynthesis, Purines, GTP, dGTP	Nucleotide biosynthesis	1.1.1.205	0	E	3.84251	NE	FP	0.94423	NE	FP
BCG_1880c	Rv1844c	phosphogluconate dehydrogenase, gnd1 or gnd2	gnd1	89	Pentose phosphate pathway	Central carbon metabolism	1.1.1.44	0.107234	NE	1.74955	NE	TN	0.98889	NE	TN
BCG_1890c	Rv1854c	type II NADH dehydrogenase, ndhA or ndh	ndh	120	Energy metabolism	Other	1.6.5.4	0.107234	NE	no-data	no-data	no-data	2e-05	E	FN
BCG_1898	Rv1862	alcohol dehydrogenase adhA, adh, adhE1, adhB	adhA	73	Pyruvate metabolism	Other	1.1.1.1	0.107234	NE	1.4778	NE	TN	0.97648	NE	TN
BCG_1908c	Rv1872c	L-lactate dehydrogenase, lldD1 or lldD2		71	Pyruvate metabolism	Central carbon metabolism		0.107234	NE	4.79	NE	TN	0.827	NE	TN
BCG_1915	Rv1878	glutamine synthetase glnA1, glnA3, glnA4	glnA3	196	Amino acid biosynthesis, Glutamate family, Glutamate/glutamine	Amino acid metabolism	6.3.1.2	0.107234	NE	1.06654	NE	TN	0.97022	NE	TN
BCG_1922c	Rv1885c	chorismate mutase	-	282	Amino acid biosynthesis, The aromatic family, Tyrosine and phenylalanine	Amino acid metabolism	5.4.99.5	0	E	2.32336	NE	FP	0.58605	NE	FP
BCG_1923c	Rv1886c	mycoyltransferase Antigen-85 complex (FbpA, FbpB, FbpC), mycoyltransferase Antigen-85 complex (FbpA, FbpB, FbpC)	fbpB	MAPC, TDM	lipid biosynthesis, Synthesis of mycolic acids, MYCOLIC ACID CONDENSATION	Lipid biosynthesis	2.3.1.-	0	E	3.10899	NE	FP	0.9508	NE	FP
BCG_1939c	Rv1900c	Probable Phospholipases	lipJ	590	Inositol phosphate metabolism, Glycerophospholipid metabolism	Lipid biosynthesis	3.1.4.3	0.107234	NE	2.22704	NE	TN	0.95661	NE	TN
BCG_1947c	Rv1908c	catalase-peroxidase, katG	katG	134	Other	Other	1.18.1.2	0	E	0.578438	NE	FP	0	E	TP
BCG_1951c	Rv1912c	acyl-CoA dehydrogenase fadE1-36 AND enoyl-CoA hydratase/isomerase echA1-21 AND 3-hydroxyacyl-CoA dehydrogenase fadB2-5 AND acetyl-CoA C-acetyltransferase fadA2-6	fadB5	552, 553, 554, 555, 556, 557, 558, 559, 560, 561, 562, 563, 564, 565, 566, 567, 568, 569, 570, 575, 576, 577, 578, 579, 580, 581, 582	beta oxidation of fatty acids	β oxidation of fatty acids	1.3.99.3 AND 4.2.1.17 AND 1.1.1.35 AND 2.3.1.16	0.107234	NE	0.598702	NE	TN	0.82743	NE	TN
BCG_1954	Rv1915	isocitrate lyase ICL1 (aceA or icl gene) or ILC2 (aceAa and aceAb genes). Note that In Mycobacterium tuberculosis strain CDC1551, aceA exists as a single gene	acea	102, 85	Glyoxylate shunt	Central carbon metabolism	4.1.3.1	0.107234	NE	0.97	NE	TN	0.928	NE	TN
BCG_1954	Rv1916	isocitrate lyase ICL1 (aceA or icl gene) or ILC2 (aceAa and aceAb genes). Note that In Mycobacterium tuberculosis strain CDC1551, aceA exists as a single gene	aceb	102, 85	Glyoxylate shunt	Central carbon metabolism	4.1.3.1	0.107234	NE	no-data	no-data	no-data	0.896	NE	TN
BCG_1962	Rv1923	Probable Phospholipases	lipD	590	Inositol phosphate metabolism, Glycerophospholipid metabolism	Lipid biosynthesis	3.1.4.3	0.107234	NE	1.90016	NE	TN	0.98598	NE	TN
BCG_1964	Rv1925	acyl-CoA dehydrogenase fadE1-36 AND enoyl-CoA hydratase/isomerase echA1-21 AND 3-hydroxyacyl-CoA dehydrogenase fadB2-5 AND acetyl-CoA C-acetyltransferase fadA2-11	fadD31	537, 538, 539, 540, 541, 542, 543, 544, 545, 546, 547, 548, 549, 550, 551	beta oxidation of fatty acids	β oxidation of fatty acids	1.3.99.3 AND 4.2.1.17 AND 1.1.1.35 AND 2.3.1.16	0.107234	NE	3.29316	NE	TN	0.99251	NE	TN
BCG_1972c	Rv1933c	acyl-CoA dehydrogenase fadE1-36 AND enoyl-CoA hydratase/isomerase echA1-21 AND 3-hydroxyacyl-CoA dehydrogenase fadB2-5 AND acetyl-CoA C-acetyltransferase fadA2-6	fadE18	552, 553, 554, 555, 556, 557, 558, 559, 560, 561, 562, 563, 564, 565, 566, 567, 568, 569, 570, 575, 576, 577, 578, 579, 580, 581, 582	beta oxidation of fatty acids	β oxidation of fatty acids	1.3.99.3 AND 4.2.1.17 AND 1.1.1.35 AND 2.3.1.16	0.107234	NE	no-data	no-data	no-data	0.71492	NE	TN
BCG_1973c	Rv1934c	acyl-CoA dehydrogenase fadE1-36 AND enoyl-CoA hydratase/isomerase echA1-21 AND 3-hydroxyacyl-CoA dehydrogenase fadB2-5 AND acetyl-CoA C-acetyltransferase fadA2-6	fadE17	552, 553, 554, 555, 556, 557, 558, 559, 560, 561, 562, 563, 564, 565, 566, 567, 568, 569, 570, 575, 576, 577, 578, 579, 580, 581, 582	beta oxidation of fatty acids	β oxidation of fatty acids	1.3.99.3 AND 4.2.1.17 AND 1.1.1.35 AND 2.3.1.16	0.107234	NE	0.999748	NE	TN	0.7782	NE	TN
BCG_1974c	Rv1935c	acyl-CoA dehydrogenase fadE1-36 AND enoyl-CoA hydratase/isomerase echA1-21 AND 3-hydroxyacyl-CoA dehydrogenase fadB2-5 AND acetyl-CoA C-acetyltransferase fadA2-6	echA13	552, 553, 554, 555, 556, 557, 558, 559, 560, 561, 562, 563, 564, 565, 566, 567, 568, 569, 570, 575, 576, 577, 578, 579, 580, 581, 582	beta oxidation of fatty acids	β oxidation of fatty acids	1.3.99.3 AND 4.2.1.17 AND 1.1.1.35 AND 2.3.1.16	0.107234	NE	0.464942	NE	TN	0.91791	NE	TN
BCG_1979	Rv1940	GTP cyclohydrolase II ribA2, ribA2, 3,4-dihydroxy-2-butanone 4-phosphate synthase	ribA1	381, 385	Cofactor biosynthesis, Riboflavin (vitamin B2), FMN and FAD biosynthesis	Cofactor biosynthesis	3.5.4.25	0	E	0.95449	NE	FP	0.43278	NE	FP
BCG_2019	Rv2002	fas II Module (kasA/B, mabA/fabG1, fabA/fab2, inhA)	fabG3	621, 624, 625, 626, 628, 629, 630	lipid biosynthesis, Synthesis of mycolic acids, FASIIA module	Lipid biosynthesis	2.3.1.41 and 1.1.1.100 and 2.1.1.-	0.107234	NE	0.346352	NE	TN	0.74854	NE	TN
BCG_2023	Rv2006	trehalose-phosphatase otsB2 and trehalosemonomycolatephosphate phosphatase	otsB1	642	Disaccharides, Trehalose	Lipid biosynthesis	3.1.3.12 and 3.-.-.-	0.107234	NE	0.504017	NE	TN	0.00033	E	FN
BCG_2048c	Rv2029c	6-phosphofructokinase, pfkA or pfkB	pfkB	41	Glycolysis	Central carbon metabolism	2.7.1.11	0.107234	NE	0.330609	NE	TN	0.93607	NE	TN
BCG_2064c	Rv2045c	Probable Phospholipases	lipT	590	Inositol phosphate metabolism, Glycerophospholipid metabolism	Lipid biosynthesis	3.1.4.3	0.107234	NE	0.885057	NE	TN	0.60035	NE	TN
BCG_2067c	Rv2048c	polyketide synthase, pks12, msl6	pks12	615, 616	synthesis of mannosyl beta-1-phosphodolichol (MPD)	Lipid biosynthesis	-	0.107234	NE	no-data	no-data	no-data	7e-05	E	FN
BCG_2070	Rv2051c	polyprenol mannose synthase, Ppm1	ppm1	14	C6 Compounds, mannose	Carbohydrate metabolism (excluding central metabolism)	2.3.1.-	0	E	0.628608	NE	FP	7e-05	E	TP
BCG_2083	Rv2064	possible precorrin-3X synthase; CobG	cobG	442	Cofactor biosynthesis, cobalamin biosynthesis	Cofactor biosynthesis	1.14.13.83	0.107234	NE	no-data	no-data	no-data	0.07661	NE	TN
BCG_2084	Rv2065	Probable Precorrin-3B C17-methyltransferase / Precorrin-2 C20-methyltransferase, cobI/cobJ, probable precorrin isomerase, cobH	cobH	448	Cofactor biosynthesis, cobalamin biosynthesis	Cofactor biosynthesis	2.1.1.130 and 2.1.1.131 and 5.4.1.2.	0.107234	NE	1.24008	NE	TN	0.86466	NE	TN
BCG_2085	Rv2066	Probable Precorrin-3B C17-methyltransferase / Precorrin-2 C20-methyltransferase, cobI/cobJ		441	Cofactor biosynthesis, cobalamin biosynthesis	Cofactor biosynthesis		0.107234	NE	2.4	NE	TN	0.937	NE	TN
BCG_2089c	Rv2070c	probable precorrin-6x reductase	cobK	446	Cofactor biosynthesis, cobalamin biosynthesis	Cofactor biosynthesis	1.3.1.54	0.107234	NE	0.718396	NE	TN	0.61132	NE	TN
BCG_2090c	Rv2071c	Probable precorrin-3 methylase, cobM	cobM	444	Cofactor biosynthesis, cobalamin biosynthesis	Cofactor biosynthesis	2.1.1.133	0.107234	NE	2.07692	NE	TN	0.88157	NE	TN
BCG_2138c	Rv2121c	ATP phosphoribosyltransferase	hisG	261	Amino acid biosynthesis, The histidine family, Histidine	Amino acid metabolism	2.4.2.17	0	E	0.0699197	E	TP	0.00903	E	TP
BCG_2139c	Rv2122c	phosphoribosyl-ATP diphosphatase	hisE	262	Amino acid biosynthesis, The histidine family, Histidine	Amino acid metabolism	3.6.1.31	0	E	0.0451273	E	TP	0.17221	NE	FP
BCG_2141c	Rv2124c	methionine synthase (cobalamin-dependent) metH	metH	243, 244	Amino acid biosynthesis, The aspartate family, Methionine	Amino acid metabolism	2.1.1.13 and 2.1.1.14	0.107234	NE	0.644986	NE	TN	0.93746	NE	TN
BCG_2144	Rv2127	L-aspartate transport via ABC system	ansP1	823	Transport reaction	Transport reaction	-	0.107234	NE	1.35561	NE	TN	0.96172	NE	TN
BCG_2147c	Rv2130	L-cysteine:1 D-myo-inositol 2-amino-2-deoxy-?-D-glucopyranoside ligase, mshC	cysS	482	Cofactor biosynthesis, mycothiol biosynthesis	Cofactor biosynthesis	-	0.107234	NE	0.0597719	E	FN	0	E	FN
BCG_2156	Rv2139	dihydroorotate oxidase	pyrD	290	Nucleotide biosynthesis, de novo biosynthesis of pyrimidine ribonucleotides	Nucleotide biosynthesis	1.3.3.1	0	E	0.515466	NE	FP	0.0009	E	TP
BCG_2169c	Rv2152c	UDP-N-acetylmuramate-alanine ligase	murC	723	Peptidoglycan Synthesis, NAG and NAM biosynthesis	Cell wall syntheisis	6.3.2.8	0	E	0.0209743	E	TP	0.00045	E	TP
BCG_2170c	Rv2153c	UDP-N-acetylglucosamine-N-acetylmuramyl(pentapeptide) phosphoryl-undecaprenyl-N-acetylglucoasmine transferase (Lipid 2 formation)	murG	728	Peptidoglycan Synthesis, NAG and NAM biosynthesis	Cell wall syntheisis	2.4.1.-	0	E	0.0511631	E	TP	0.00045	E	TP
BCG_2172c	Rv2155c	UDP-N-acetylmuramoylalanine D-glutamate ligase, murD	murD	724	Peptidoglycan Synthesis, NAG and NAM biosynthesis	Cell wall syntheisis	6.3.2.9	0	E	0.0403031	E	TP	1e-05	E	TP
BCG_2173c	Rv2156c	Probable phospho-N-acetylmuramoyl-pentappeptidetransferase MurX (Lipid 1 formation)	mraY	727	Peptidoglycan Synthesis, NAG and NAM biosynthesis	Cell wall syntheisis	2.7.8.13	0	E	0.0154381	E	TP	0.00153	E	TP
BCG_2174c	Rv2157c	UDP-N-acetylmuramoylalanyl-D-glutamate-2,6-diaminopimelate-D-alanyl-D-alanyl ligase	murF	726	Peptidoglycan Synthesis, NAG and NAM biosynthesis	Cell wall syntheisis	6.3.2.15	0	E	0.0334247	E	TP	0.00505	E	TP
BCG_2175c	Rv2158c	UDP-N-acetylmuramoylalanyl-D-glutamate-2,6-diaminopimelate ligase	murE	725	Peptidoglycan Synthesis, NAG and NAM biosynthesis	Cell wall syntheisis	6.3.2.13	0	E	no-data	no-data	no-data	0.00279	E	TP
BCG_2188	Rv2173	dimethylallyltranstransferase		686	Polyprenoids biosynthesis	Other		0.107234	NE	no-data	no-data	no-data	0.908	NE	TN
BCG_2193c	Rv2178c	3-deoxy-7-phosphoheptulonate synthase, aroG	aroG	270	Amino acid biosynthesis, The aromatic family, The shikimate pathway	Amino acid metabolism	2.5.1.54	0	E	0.159798	E	TP	0.00014	E	TP
BCG_2197c	Rv2182c	1-acylglycerol-3-phosphate O-acyltransferase, 1-hexadecanoyl-sn-glycerol 3-phosphate O-acyltransferase	-	587, 595	Phospholipid synthesis, Synthesis of Phosphatidylethanolamine	Lipid biosynthesis	2.3.1.51	0.107234	NE	0.142655	E	FN	0	E	FN
BCG_2203	Rv2187	acyl-CoA dehydrogenase fadE1-36 AND enoyl-CoA hydratase/isomerase echA1-21 AND 3-hydroxyacyl-CoA dehydrogenase fadB2-5 AND acetyl-CoA C-acetyltransferase fadA2-11	fadD15	537, 538, 539, 540, 541, 542, 543, 544, 545, 546, 547, 548, 549, 550, 551	beta oxidation of fatty acids	β oxidation of fatty acids	1.3.99.3 AND 4.2.1.17 AND 1.1.1.35 AND 2.3.1.16	0.107234	NE	2.72077	NE	TN	0.99984	NE	TN
BCG_2208c	Rv2192c	anthranilate phosphoribosyltransferase trpD	trpD	278	Amino acid biosynthesis, The aromatic family, Tryptophan biosynthesis	Amino acid metabolism	2.4.2.18	0	E	0.0625167	E	TP	0.04669	E	TP
BCG_2209	Rv2193	aa3-type cytochrome c oxidase, ctaCDE AND cytochrome bc1	ctaE	126	Energy metabolism	Other	1.10.3.-	0.0936986	NE	0.0403371	E	FN	7e-05	E	FN
BCG_2210	Rv2194	aa3-type cytochrome c oxidase, ctaCDE AND cytochrome bc1	qcrC	126	Energy metabolism	Other	1.10.3.-	0.0936986	NE	0.0336287	E	FN	0.00153	E	FN
BCG_2211	Rv2195	aa3-type cytochrome c oxidase, ctaCDE AND cytochrome bc1	qcrA	126	Energy metabolism	Other	1.10.3.-	0.0936986	NE	0.0268	E	FN	0	E	FN
BCG_2212	Rv2196	aa3-type cytochrome c oxidase, ctaCDE AND cytochrome bc1	qcrB	126	Energy metabolism	Other	1.10.3.-	0.0936986	NE	0.0308385	E	FN	0	E	FN
BCG_2216c	Rv2200c	aa3-type cytochrome c oxidase, ctaCDE AND cytochrome bc1	ctaC	126	Energy metabolism	Other	1.10.3.-	0.0936986	NE	0.0514618	E	FN	4e-05	E	FN
BCG_2217	Rv2201	asparagine synthase asnB	asnB	226	Amino acid biosynthesis, The aspartate family, Asparagine	Amino acid metabolism	6.3.5.4	0	E	0.0485863	E	TP	0	E	TP
BCG_2218c	Rv2202c	adenylate kinase	cbhK	351b	Nucleotide biosynthesis, Purines, ATP, ADP	Nucleotide biosynthesis, Purines, ATP, ADP	2.7.1.20	0.107229	NE	no-data	no-data	no-data	1e-05	E	FN
BCG_2221c	Rv2205c	conserved hypothetical protein belonging to the glycerate kinase family	-	6	C3 compounds, glycerate	Carbohydrate metabolism (excluding central metabolism)	2.7.1.31	0.107234	NE	0.950284	NE	TN	0.96122	NE	TN
BCG_2224	Rv2208	Probable cobalamin (5'-phosphate) synthase, cobS and adenosylcobinamide-GDP ribazoletransferase	cobS	457	Cofactor biosynthesis, cobalamin biosynthesis	Cofactor biosynthesis	2.-.-.- and 2.7.8.26	0.107234	NE	0.838462	NE	TN	0.91791	NE	TN
BCG_2226c	Rv2210c	Branched-chain-amino-acid transaminase	ilvE	149, 214, 219, 224	Amino acid degradation, Branched chain amino acids, Isoleucine	Amino acid metabolism	2.6.1.42	0	E	0.0783932	E	TP	1e-05	E	TP
BCG_2227c	Rv2211c	aminomethyltransferase gcvT	gcvT	184	Amino acid degradation, The serine family, Glycine	Amino acid metabolism	2.1.2.10	0.104263	NE	0.0840644	E	FN	7e-05	E	FN
BCG_2231	Rv2215	dihydrolipoyllysine-residue acetyltransferase pdhC, E2 component of PDH	dlaT	53	Citrate cycle (TCA cycle)	Central carbon metabolism	2.3.1.61	0.107234	NE	0.0457058	E	FN	0.00024	E	FN
BCG_2233	Rv2217	lipoyl-protein ligase lipB	lipB	427b	Cofactor biosynthesis, lipoic acid biosynthesis	Cofactor biosynthesis	-	0	E	0.0922565	E	TP	0.01203	E	TP
BCG_2234	Rv2218	lipoate synthase, lipA	lipA	427c	Cofactor biosynthesis, lipoic acid biosynthesis	Cofactor biosynthesis	2.8.1.8	0	E	0.0566606	E	TP	0.00096	E	TP
BCG_2237	Rv2220	secreted glutamine synthetase glnA1 + unknown enzymes, glutamine synthetase glnA1, glnA3, glnA4	glnA1	P_L_GLX, 196	poly-L-glutamate/glutamine synthesis (cell wall)	Cell wall syntheisis	6.3.1.2	0	E	0.0940052	E	TP	0	E	TP
BCG_2242	Rv2225	3-methyl-2-oxobutanoate hydroxymethyltransferase	panB	390	Cofactor biosynthesis, Coenzyme-A biosynthesis	Cofactor biosynthesis	2.1.2.11	0	E	0.130225	E	TP	0.00024	E	TP
BCG_2249c	Rv2231c	Possible cobC, aminotransferase.	cobD	454	Cofactor biosynthesis, cobalamin biosynthesis	Cofactor biosynthesis	-	0.107234	NE	no-data	no-data	no-data	0.29382	NE	TN
BCG_2258	Rv2241	pyruvate dehydrogenase (acetyl-transferring), E1 component, aceE	aceE	52	Glycolysis	Central carbon metabolism		0.107234	NE	0.96	NE	TN	0	E	FN
BCG_2260	Rv2243	fatty acid synthase	fabD	496, 509, 510, 511, 512, 513, 514, 515, 516, 517, 518, 519, 520, 521, 522, 533, 618, 619	lipid biosynthesis, pathway 1	Lipid biosynthesis	2.3.1.41/1.1.1.100/1.3.1.10	0.107234	NE	no-data	no-data	no-data	0.10518	NE	TN
BCG_2261	Rv2244	fatty acid synthase	acpP	496, 509, 510, 511, 512, 513, 514, 515, 516, 517, 518, 519, 520, 521, 522, 533, 618, 619	lipid biosynthesis, pathway 1	Lipid biosynthesis	2.3.1.41/1.1.1.100/1.3.1.10	0	E	0.202507	E	TP	0.04669	E	TP
BCG_2262	Rv2245	fas II Module (kasA/B, mabA/fabG1, fabA/fab2, inhA)	kasA	624, 625, 626, 628, 629, 630	lipid biosynthesis, Synthesis of mycolic acids, FASIIA module	Lipid biosynthesis	2.3.1.41 and 1.1.1.100 and 2.1.1.-	0.107234	NE	0.0388556	E	FN	0.00013	E	FN
BCG_2263	Rv2246	fas II Module (kasA/B, mabA/fabG1, fabA/fab2, inhA)	kasB	624, 625, 626, 628, 629, 630	lipid biosynthesis, Synthesis of mycolic acids, FASIIA module	Lipid biosynthesis	2.3.1.41 and 1.1.1.100 and 2.1.1.-	0.107234	NE	0.0372091	E	FN	2e-05	E	FN
BCG_2264	Rv2247	acetyl-CoA/propionyl-CoA carboxylase carboxytransferase subunit: 6 paralogues in Mtb: accD1, accD2, accD3, accD4, accD5, accD6	accD6	156, 163, 495	Amino acid degradation, Branched chain amino acids, Isoleucine	Amino acid metabolism	6.4.1.4 and 6.4.1.3 and 6.4.1.2	0.107234	NE	0.193663	E	FN	0.0009	E	FN
BCG_2267c	Rv2249c	glycerol-3-phosphate dehydrogenase glpD1, glpD2	glpD1	4	C3 compounds, Glycerol metabolism	Central carbon metabolism	1.1.99.5	0.107234	NE	no-data	no-data	no-data	0.91873	NE	TN
BCG_2277	Rv2259	L-threonine 3-dehydrogenase	adhE2	178	Amino acid degradation, The aspartate family, Threonine	Amino acid metabolism	1.1.1.103	0.107234	NE	no-data	no-data	no-data	0.1993	NE	TN
BCG_2284c	Rv2267c	sulfotransferase	-	668	sulfolipid-1 (SL-1) synthesis, trehalose sulfate (TRE-S) synthesis	Lipid biosynthesis	-	0.107234	NE	0.585818	NE	TN	0.25538	NE	TN
BCG_2296	Rv2281	phosphate reversible transport via symport/ phosphate transport protein	pitB	883	Transport reaction	Transport reaction	-	0.088723	NE	no-data	no-data	no-data	0.18716	NE	TN
BCG_2299	Rv2284	Probable Phospholipases	lipM	590	Inositol phosphate metabolism, Glycerophospholipid metabolism	Lipid biosynthesis	3.1.4.3	0.107234	NE	no-data	no-data	no-data	0.8391	NE	TN
BCG_2300	Rv2285	triacylglycerol synthase	-	TAG	triglyceride synthesis	Lipid biosynthesis	2.3.1.75	0.107234	NE	0.516692	NE	TN	0.76519	NE	TN
BCG_2342c	Rv2321c	ornithine aminotransferase rocD1, rocD2	rocD2	144	Amino acid degradation, Glutamate family, Arginine	Amino acid metabolism	2.6.1.13	0.107234	NE	no-data	no-data	no-data	0.71492	NE	TN
BCG_2343c	Rv2322c	ornithine aminotransferase rocD1, rocD2	rocD1	144	Amino acid degradation, Glutamate family, Arginine	Amino acid metabolism	2.6.1.13	0.107234	NE	0.492801	NE	TN	0.46741	NE	TN
BCG_2354	Rv2332	malic enzyme (malate dehydrogenase (oxaloacetate-decarboxylating))	mez	72	Pyruvate metabolism	Central carbon metabolism	1.1.1.38	0.107227	NE	0.981262	NE	TN	0.97373	NE	TN
BCG_2356	Rv2334	cysteine synthase cysK, cysM	cysK1	251	Amino acid biosynthesis, The serine family, Cysteine	Amino acid metabolism	2.5.1.47	0.107234	NE	0.604878	NE	TN	0.21191	NE	TN
BCG_2357	Rv2335	serine O-acetyltransferase	cysE	250	Amino acid biosynthesis, The serine family, Cysteine	Amino acid metabolism	2.3.1.30	0.10722	NE	0.57467	NE	TN	0.17284	NE	TN
BCG_2375c	Rv2361c	Decaprenyl diphosphate synthase	-	694	Polyprenoids biosynthesis	Other	2.5.1.31	0	E	0.0769857	E	TP	7e-05	E	TP
BCG_2394c	Rv2380c	acyl transferase	mbtE	489, 490	mycobactin synthesis	Other	-	0.107234	NE	no-data	no-data	no-data	0.01003	E	FN
BCG_2395c	Rv2381c	acyl transferase	mbtD	491	mycobactin synthesis	Other	-	0.107234	NE	no-data	no-data	no-data	0.00018	E	FN
BCG_2396c	Rv2382c	acyl transferase	mbtC	491	mycobactin synthesis	Other	-	0.107234	NE	0.0830652	E	FN	0.41588	NE	TN
BCG_2397c	Rv2383c	acyl transferase	mbtB	488	mycobactin synthesis	Other	-	0.107234	NE	0.68209	NE	TN	0.95715	NE	TN
BCG_2398c	Rv2384	acyl transferase	mbtA	487	mycobactin synthesis	Other	-	0.107234	NE	no-data	no-data	no-data	0.48529	NE	TN
BCG_2399	Rv2385	Probable Phospholipases	mbtJ	590	Inositol phosphate metabolism, Glycerophospholipid metabolism	Lipid biosynthesis	3.1.4.3	0.107234	NE	1.06574	NE	TN	0.99135	NE	TN
BCG_2400c	Rv2386c	isochorismate pyruvate-lyase	mbtI	412	isochorismate synthase entC, mbt1	Cofactor biosynthesis	-	0.107234	NE	0.145073	E	FN	0.00031	E	FN
BCG_2402c	Rv2388c	coproporphyrinogen:oxygen oxidoreductase (decarboxylating) and Probable oxygen-independent coproporphyrinogen III oxidase	hemN	436	Cofactor biosynthesis, heme biosynthesis	Cofactor biosynthesis	1.3.3.3 and 1.3.99.2	0.107234	NE	1.01489	NE	TN	0.71635	NE	TN
BCG_2405	Rv2391	sulfite reductase nirA	nirA	112	Sulfate metabolism	Other	1.7.7.1	0	E	0.19353	E	TP	2e-05	E	TP
BCG_2406	Rv2392	3'-phosphoadenylylsulfate (PAPS) reductase cysH (thioredoxin-dependent)	cysH	111	Sulfate metabolism	Other	1.8.4.8	0	E	0.107326	E	TP	0.00083	E	TP
BCG_2412c	Rv2397c	sulfate transport via ABC system cysTWA and sulfate-binding lipoprotein, subI	cysA1	841	Transport reaction	Transport reaction	-	0	E	0.147538	E	TP	0.00024	E	TP
BCG_2413	Rv2398c	sulfate transport via ABC system cysTWA and sulfate-binding lipoprotein, subI	cysW	841	Transport reaction	Transport reaction	-	0	E	0.0795771	E	TP	7e-05	E	TP
BCG_2414	Rv2399c	sulfate transport via ABC system cysTWA and sulfate-binding lipoprotein, subI	cysT	841	Transport reaction	Transport reaction	-	0	E	0.0973187	E	TP	0.00505	E	TP
BCG_2415	Rv2400c	sulfate transport via ABC system cysTWA and sulfate-binding lipoprotein, subI	subI	841	Transport reaction	Transport reaction	-	0	E	0.0691498	E	TP	2e-05	E	TP
BCG_2437c	Rv2421c	nicotinate-nucleotide adenylyltransferase	nadD	368, 375	Cofactor biosynthesis, Nicotinamide nucleotides (NAD+, NADP) biosynthesis	Cofactor biosynthesis	2.7.7.18	0	E	0.195618	E	TP	0.00045	E	TP
BCG_2444c	Rv2427c	glutamate-5-semialdehyde dehydrogenase proA	proA	200	Amino acid biosynthesis, Glutamate family, Proline	Amino acid metabolism	1.2.1.41	0.107234	NE	0.454703	NE	TN	0.63505	NE	TN
BCG_2454c	Rv2435c	adenylate cyclase	-	324	Nucleotide biosynthesis, Purines	Nucleotide biosynthesis	4.6.1.1	0.107234	NE	0.482792	NE	TN	0.0549	NE	TN
BCG_2455	Rv2436	ribokinase rbsK	rbsK	7, 98	C5 compounds, D-ribose	Carbohydrate metabolism (excluding central metabolism)	2.7.1.15	0.105149	NE	no-data	no-data	no-data	0.09121	NE	TN
BCG_2457c	Rv2438c	NAD synthetase (NH3-dependent), nadE, NAD synthase (glutamine-hydrolysing), nadE	nadE	369, 370	Cofactor biosynthesis, Nicotinamide nucleotides (NAD+, NADP) biosynthesis	Cofactor biosynthesis	6.3.1.5 and 6.3.5.1	0	E	0.0233238	E	TP	0	E	TP
BCG_2459c	Rv2439c	glutamate 5-kinase proB	proB	199	Amino acid biosynthesis, Glutamate family, Proline	Amino acid metabolism	2.7.2.11	0.107234	NE	0.0647313	E	FN	0.00083	E	FN
BCG_2465c	Rv2445c	nucleoside-diphosphate kinase	ndk	294, 299, 305, 306, 329, 354, 358, 361	Nucleotide biosynthesis, de novo biosynthesis of pyrimidine ribonucleotides	Nucleotide biosynthesis	2.7.4.6	0	E	1.74807	NE	FP	0.14626	NE	FP
BCG_2467c	Rv2447c	dihydrofolate synthase, tetrahydrofolylpolyglutamate synthase	folC	407, 409	Cofactor biosynthesis, Folate biosynthesis	Cofactor biosynthesis	6.3.2.12 and 6.3.2.17	0.107234	NE	0.0428953	E	FN	0.00083	E	FN
BCG_2473c	Rv2453c	probable molybdopterin-guanine dinucleotide biosynthesis protein MobA	mobA	464	Cofactor biosynthesis, molybdopterin biosynthesis	Cofactor biosynthesis	-	0.107234	NE	0.900751	NE	TN	0.77686	NE	TN
BCG_2474c	Rv2454c	2-oxoglutarate synthase	-	62	Citrate cycle (TCA cycle)	Central carbon metabolism	1.2.7.3	0.107234	NE	no-data	no-data	no-data	0.00024	E	FN
BCG_2475c	Rv2455c	2-oxoglutarate synthase	-	62	Citrate cycle (TCA cycle)	Central carbon metabolism	1.2.7.3	0.107234	NE	no-data	no-data	no-data	0	E	FN
BCG_2478	Rv2458	Probable Homocysteine S-Methyltransferase mmuM	mmuM	242	Amino acid biosynthesis, The aspartate family, Methionine	Amino acid metabolism	2.1.1.10	0.107234	NE	3.49494	NE	TN	0.98573	NE	TN
BCG_2483	Rv2463	Probable Phospholipases	lipP	590	Inositol phosphate metabolism, Glycerophospholipid metabolism	Lipid biosynthesis	3.1.4.3	0.107234	NE	1.02055	NE	TN	0.99475	NE	TN
BCG_2485c	Rv2465c	ribose-5-phosphate isomerase, rpiB	-	91	Pentose phosphate pathway	Central carbon metabolism	5.3.1.6	0	E	0.519028	NE	FP	0.02762	E	TP
BCG_2491	Rv2471	alpha-glucosidase	aglA	24, 25	Disaccharides, maltose	Carbohydrate metabolism (excluding central metabolism)	3.2.1.20	0.107234	NE	0.51623	NE	TN	0.88157	NE	TN
BCG_2496c	Rv2476c	glutamate dehydrogenase (NADP)	gdh	198	Amino acid biosynthesis, Glutamate family, Glutamate/glutamine	Amino acid metabolism	1.4.1.4	0.107234	NE	no-data	no-data	no-data	0	E	FN
BCG_2500c	Rv2482c	glycerol-3-phosphate O-acyltransferase plsB1	plsB2	583, 594	Phospholipid synthesis, Synthesis of Phosphatidylethanolamine	Lipid biosynthesis	2.3.1.15	0	E	0.497825	NE	FP	0.48665	NE	FP
BCG_2501c	Rv2483c	1-acylglycerol-3-phosphate O-acyltransferase, 1-hexadecanoyl-sn-glycerol 3-phosphate O-acyltransferase	plsC	587, 595	Phospholipid synthesis, Synthesis of Phosphatidylethanolamine	Lipid biosynthesis	2.3.1.51	0.107234	NE	no-data	no-data	no-data	0.57425	NE	TN
BCG_2502c	Rv2484c	triacylglycerol synthase	-	TAG	triglyceride synthesis	Lipid biosynthesis	2.3.1.75	0.107234	NE	no-data	no-data	no-data	0.99591	NE	TN
BCG_2503c	Rv2485c	Probable Phospholipases	lipQ	590	Inositol phosphate metabolism, Glycerophospholipid metabolism	Lipid biosynthesis	3.1.4.3	0.107234	NE	1.56702	NE	TN	0.91873	NE	TN
BCG_2504	Rv2486	acyl-CoA dehydrogenase fadE1-36 AND enoyl-CoA hydratase/isomerase echA1-21 AND 3-hydroxyacyl-CoA dehydrogenase fadB2-5 AND acetyl-CoA C-acetyltransferase fadA2-6	echA14	153, 171, 552, 553, 554, 555, 556, 557, 558, 559, 560, 561, 562, 563, 564, 565, 566, 567, 568, 569, 570, 575, 576, 577, 578, 579, 580, 581, 582	beta oxidation of fatty acids	β oxidation of fatty acids	1.3.99.3 AND 4.2.1.17 AND 1.1.1.35 AND 2.3.1.16	0.107234	NE	2.15224	NE	TN	0.93607	NE	TN
BCG_2515c	Rv2495c	pyruvate dehydrogenase, 3-methyl-2-oxobutanoate dehydrogenase	pdhC	151, 161, 169	Glycolysis	Central carbon metabolism	1.2.4.1 and 2.3.1.12 and 1.8.1.4	0.103955	NE	no-data	no-data	no-data	0.37774	NE	TN
BCG_2516c	Rv2496c	3-methyl-2-oxobutanoate dehydrogenase (alpha subunit AND beta subunit)	pdhB	150, 160, 168, 52, 53, 54	Glycolysis	Central carbon metabolism	1.2.4.1 and 2.3.1.12 and 1.8.1.4	0.103955	NE	0.497487	NE	TN	0.00306	E	FN
BCG_2517c	Rv2497c	3-methyl-2-oxobutanoate dehydrogenase (alpha subunit AND beta subunit)	pdhA	150, 160, 168, 52, 53, 54	Glycolysis	Central carbon metabolism	1.2.4.1 and 2.3.1.12 and 1.8.1.4	0.103955	NE	1.29524	NE	TN	0.50131	NE	TN
BCG_2520c	Rv2500c	acyl-CoA dehydrogenase fadE1-36 AND enoyl-CoA hydratase/isomerase echA1-21 AND 3-hydroxyacyl-CoA dehydrogenase fadB2-5 AND acetyl-CoA C-acetyltransferase fadA2-6	fadE19	552, 553, 554, 555, 556, 557, 558, 559, 560, 561, 562, 563, 564, 565, 566, 567, 568, 569, 570, 575, 576, 577, 578, 579, 580, 581, 582	beta oxidation of fatty acids	β oxidation of fatty acids	1.3.99.3 AND 4.2.1.17 AND 1.1.1.35 AND 2.3.1.16	0.107234	NE	0.0852733	E	FN	0.00709	E	FN
BCG_2521c	Rv2501c	acetyl/propionyl-CoA carboxylase alpha subunit encoding both biotin carboxylase and BCCP. Three paralogues in Mtb: accA1, accA2, accA3.	accA1	427	Cofactor biosynthesis, biotin biosynthesis	Cofactor biosynthesis	6.3.4.14	0.107234	NE	no-data	no-data	no-data	0.05468	NE	TN
BCG_2522c	Rv2502c	acetyl-CoA/propionyl-CoA carboxylase carboxytransferase subunit: 6 paralogues in Mtb: accD1, accD2, accD3, accD4, accD5, accD6	accD1	156, 163, 495	Amino acid degradation, Branched chain amino acids, Isoleucine	Amino acid metabolism	6.4.1.4 and 6.4.1.3 and 6.4.1.2	0.107234	NE	1.4135	NE	TN	0.8391	NE	TN
BCG_2523c	Rv2503c	3-oxoacid CoA-transferase scoA, scoB	scoB	167	Amino acid degradation, Branched chain amino acids, Leucine	Amino acid metabolism	2.8.3.5	0.107234	NE	0.531357	NE	TN	0.19859	NE	TN
BCG_2524c	Rv2504c	3-oxoacid CoA-transferase scoA, scoB	scoA	167	Amino acid degradation, Branched chain amino acids, Leucine	Amino acid metabolism	2.8.3.5	0.107234	NE	no-data	no-data	no-data	0.53046	NE	TN
BCG_2525c	Rv2505c	acyl-CoA dehydrogenase fadE1-36 AND enoyl-CoA hydratase/isomerase echA1-21 AND 3-hydroxyacyl-CoA dehydrogenase fadB2-5 AND acetyl-CoA C-acetyltransferase fadA2-11	fadD35	537, 538, 539, 540, 541, 542, 543, 544, 545, 546, 547, 548, 549, 550, 551	beta oxidation of fatty acids	β oxidation of fatty acids	1.3.99.3 AND 4.2.1.17 AND 1.1.1.35 AND 2.3.1.16	0.107234	NE	2.31455	NE	TN	0.89648	NE	TN
BCG_2544c	Rv2523c	holo-[acyl-carrier-protein] synthase acpS OR 'hypothetical' withy 4'-phosphopantetheinyl transferase region, pptA - artificial reaction	acpS	398, 486	Cofactor biosynthesis, ACP biosynthesis	Other	2.7.8.7	0	E	0.381734	NE	FP	0.11883	NE	FP
BCG_2545c	Rv2524c	fatty acid synthase	fas	497, 497b, 498, 499, 500, 501, 502, 503, 504, 505, 506, 507, 534, 535, 536	lipid biosynthesis, pathway 1	Lipid biosynthesis	2.3.1.41/1.1.1.100/1.3.1.10	0	E	0.0221073	E	TP	0	E	TP
BCG_2553c	Rv2531c	ornithine decarboxylase adi, lysine decarboxylase	-	146, 182	Amino acid degradation, Glutamate family, Arginine	Amino acid metabolism	4.1.1.17 and 4.1.1.18	0	E	0.756752	NE	FP	0.79429	NE	FP
BCG_2559c	Rv2537c	3-dehydroquinate dehydratase	aroD	272	Amino acid biosynthesis, The aromatic family, The shikimate pathway	Amino acid metabolism	4.2.1.10	0	E	0.0790595	E	TP	0.02762	E	TP
BCG_2560c	Rv2538c	3-dehydroquinate synthase	aroB	271	Amino acid biosynthesis, The aromatic family, The shikimate pathway	Amino acid metabolism	4.2.3.4	0	E	0.111071	E	TP	0.00505	E	TP
BCG_2561c	Rv2539c	shikimate kinase	aroK	274	Amino acid biosynthesis, The aromatic family, The shikimate pathway	Amino acid metabolism	2.7.1.71	0	E	0.042733	E	TP	0.07631	NE	FP
BCG_2562c	Rv2540c	chorismate synthase	aroF	276	Amino acid biosynthesis, The aromatic family, The shikimate pathway	Amino acid metabolism	4.2.3.5	0	E	0.0435054	E	TP	0.00279	E	TP
BCG_2575c	Rv2552c	shikimate dehydrogenase	aroE	273	Amino acid biosynthesis, The aromatic family, The shikimate pathway	Amino acid metabolism	1.1.1.25	0	E	0.0736465	E	TP	0.09086	NE	FP
BCG_2587	Rv2565	L-glutamine binding (glnH) and transport via ABC system (glnQ)	-	829	Transport reaction	Transport reaction	-	0.107234	NE	1.6977	NE	TN	0.80563	NE	TN
BCG_2596	Rv2573	2-dehydropantoate 2-reductase	-	391	Cofactor biosynthesis, Coenzyme-A biosynthesis	Cofactor biosynthesis	1.1.1.169	0	E	0.963134	NE	FP	0.71349	NE	FP
BCG_2606c	Rv2583c	guanosine-3',5'-bis(diphosphate) 3'-diphosphatase, GTP diphosphokinase	relA	347, 348	Nucleotide biosynthesis, Purines	Nucleotide biosynthesis	3.1.7.2 and 2.7.6.5	0.107234	NE	no-data	no-data	no-data	8e-05	E	FN
BCG_2607c	Rv2584c	adenine phosphoribosyltransferase	apt	333	Nucleotide biosynthesis, Purines	Nucleotide biosynthesis	2.4.2.7	0.107234	NE	2.7725	NE	TN	0.7782	NE	TN
BCG_2612	Rv2589	4-aminobutyrate transaminase gabT	gabT	136	Amino acid degradation, Glutamate family, Glutamate	Amino acid metabolism	4.1.1.15	0.107234	NE	3.30528	NE	TN	0.93677	NE	TN
BCG_2613	Rv2590	acyl-CoA dehydrogenase fadE1-36 AND enoyl-CoA hydratase/isomerase echA1-21 AND 3-hydroxyacyl-CoA dehydrogenase fadB2-5 AND acetyl-CoA C-acetyltransferase fadA2-11	fadD9	537, 538, 539, 540, 541, 542, 543, 544, 545, 546, 547, 548, 549, 550, 551	beta oxidation of fatty acids	β oxidation of fatty acids	1.3.99.3 AND 4.2.1.17 AND 1.1.1.35 AND 2.3.1.16	0.107234	NE	1.31267	NE	TN	1	NE	TN
BCG_2625	Rv2601	spermidine synthase	speE	147	Amino acid degradation, Glutamate family, Arginine	Amino acid metabolism	2.5.1.16	0	E	1.51124	NE	FP	0.9985	NE	FP
BCG_2635c	Rv2610c	alpha-mannosyltransferase, pimA	pimA	598	Phosphatidylinositol mannoside (PIM) synthesis	Lipid biosynthesis	-	0	E	no-data	no-data	no-data	0.00013	E	TP
BCG_2636c	Rv2611c	mannosyl acyl transferase	-	599	Phosphatidylinositol mannoside (PIM) synthesis	Lipid biosynthesis	-	0	E	0.0724364	E	TP	0.00024	E	TP
BCG_2637c	Rv2612c	CDP-diacylglyceride--inositol phosphatidyltransferase pgsA	pgsA1	597	Phosphatidylinositol mannoside (PIM) synthesis	Lipid biosynthesis	2.7.8.11	0	E	0.051324	E	TP	0.17221	NE	FP
BCG_2684	Rv2671	5-amino-6-(5-phosphoribosylamino)uracil reductase	ribD	383	Cofactor biosynthesis, Riboflavin (vitamin B2), FMN and FAD biosynthesis	Cofactor biosynthesis	1.1.1.193	0.107234	NE	0.763105	NE	TN	0.18649	NE	TN
BCG_2690c	Rv2677	Probable protoporphyrinogen oxidase, hemY' or hemK	hemY	437	Cofactor biosynthesis, heme biosynthesis	Cofactor biosynthesis	1.3.3.4	0.107234	NE	no-data	no-data	no-data	0.00051	E	FN
BCG_2691c	Rv2678c	Probable uroporphyrinogen decarboxylase, hemE	hemE	434	Cofactor biosynthesis, heme biosynthesis	Cofactor biosynthesis	4.1.1.37	0	E	no-data	no-data	no-data	7e-05	E	TP
BCG_2692	Rv2679	acyl-CoA dehydrogenase fadE1-36 AND enoyl-CoA hydratase/isomerase echA1-21 AND 3-hydroxyacyl-CoA dehydrogenase fadB2-5 AND acetyl-CoA C-acetyltransferase fadA2-6	echA15	552, 553, 554, 555, 556, 557, 558, 559, 560, 561, 562, 563, 564, 565, 566, 567, 568, 569, 570, 575, 576, 577, 578, 579, 580, 581, 582	beta oxidation of fatty acids	β oxidation of fatty acids	1.3.99.3 AND 4.2.1.17 AND 1.1.1.35 AND 2.3.1.16	0.107234	NE	0.82837	NE	TN	0.77686	NE	TN
BCG_2695c	Rv2682c	1-deoxy-D-xylulose-5-phosphate synthase	dxs1	678	Polyprenoids biosynthesis	Other	2.2.1.7	0.107234	NE	0.0937768	E	FN	0	E	FN
BCG_2710c	Rv2697c	dUTP diphosphatase	dut	301	Nucleotide biosynthesis, de novo biosynthesis of pyrimidine deoxyribonucleotides	Nucleotide biosynthesis	3.6.1.23	0	E	0.128136	E	TP	0.07631	NE	FP
BCG_2714c	Rv2701c	myoinositol phosphatase	suhB	23	Inositols, MYO-INOSITOL SYNTHESIS	Lipid biosynthesis	3.1.3.26	0	E	0.685183	NE	FP	0.49993	NE	FP
BCG_2715	Rv2702	polyphosphate glucokinase ppgK	ppgK	35, 36	Phosphorylation of glucose	Central carbon metabolism	2.7.1.63	0.107234	NE	0.183115	E	FN	0.1993	NE	TN
BCG_2726	Rv2713	Probable Soluble Pyrimidine Nucleotide Transhydrogenase sthA	sthA	379	Cofactor biosynthesis, Nicotinate and nicotinamide metabolism	Cofactor biosynthesis		0.107234	NE	1.52	NE	TN	0.997	NE	TN
BCG_2737c	Rv2724c	acyl-CoA dehydrogenase fadE1-36 AND enoyl-CoA hydratase/isomerase echA1-21 AND 3-hydroxyacyl-CoA dehydrogenase fadB2-5 AND acetyl-CoA C-acetyltransferase fadA2-6	fadE20	552, 553, 554, 555, 556, 557, 558, 559, 560, 561, 562, 563, 564, 565, 566, 567, 568, 569, 570, 575, 576, 577, 578, 579, 580, 581, 582	beta oxidation of fatty acids	β oxidation of fatty acids	1.3.99.3 AND 4.2.1.17 AND 1.1.1.35 AND 2.3.1.16	0.107234	NE	0.689352	NE	TN	0.9985	NE	TN
BCG_2739c	Rv2726c	diaminopimelate epimerase dapF	dapF	237	Amino acid biosynthesis, The aspartate family, Lysine	Amino acid metabolism	5.1.1.7	0	E	0.113021	E	TP	0.00279	E	TP
BCG_2762c	Rv2746c	CDP-diacylglycerol-glycerol-3-phosphate 3-phosphatidyltransferase	pgsA3	592	Phospholipid synthesis, synthesis of phophatidlyglycerol	Lipid biosynthesis	2.7.8.5	0.107234	NE	0.0686659	E	FN	0.0009	E	FN
BCG_2763	Rv2747	N-acetylglutamate synthase, argA	Rv2747	203	Amino acid biosynthesis, Glutamate family, Arginine	Amino acid metabolism		0.107234	NE	0.03	E	FN	0.032	E	FN
BCG_2769c	Rv2753c	dihydrodipicolinate synthase dapA	dapA	232	Amino acid biosynthesis, The aspartate family, Lysine	Amino acid metabolism	4.2.1.52	0	E	0.0730693	E	TP	0.00505	E	TP
BCG_2770c	Rv2754c	thymidylate synthase, thyX	thyX	302	Nucleotide biosynthesis, de novo biosynthesis of pyrimidine deoxyribonucleotides	Nucleotide biosynthesis	2.1.1.148	0.107233	NE	0.128081	E	FN	0.00903	E	FN
BCG_2780c	Rv2763c	dihydrofolate reductase, folA (dfrA)	dfrA	408	Cofactor biosynthesis, Folate biosynthesis	Cofactor biosynthesis	1.5.1.3	0.107234	NE	no-data	no-data	no-data	0.00903	E	FN
BCG_2781c	Rv2764c	thymidylate synthase, thyA	thyA	303	Nucleotide biosynthesis, de novo biosynthesis of pyrimidine deoxyribonucleotides	Nucleotide biosynthesis	2.1.1.45	0.107234	NE	no-data	no-data	no-data	0	E	FN
BCG_2783c	Rv2766c	fas II Module (kasA/B, mabA/fabG1, fabA/fab2, inhA)	fabG	621, 624, 625, 626, 628, 629, 630	lipid biosynthesis, Synthesis of mycolic acids, FASIIA module	Lipid biosynthesis	2.3.1.41 and 1.1.1.100 and 2.1.1.-	0.107234	NE	1.59919	NE	TN	0.94961	NE	TN
BCG_2790c	Rv2773c	dihydrodipicolinate reductase dapB	dapB	233	Amino acid biosynthesis, The aspartate family, Lysine	Amino acid metabolism	1.3.1.26	0	E	0.438348	NE	FP	0.00153	E	TP
BCG_2804c	Rv2786c	6,7-dimethyl-8-ribityllumazine synthase and riboflavin synthase	ribF	388, 389	Cofactor biosynthesis, Riboflavin (vitamin B2), FMN and FAD biosynthesis	Cofactor biosynthesis	2.5.1.9	0	E	0.17672	E	TP	0.0009	E	TP
BCG_2807c	Rv2789c	acyl-CoA dehydrogenase fadE1-36 AND enoyl-CoA hydratase/isomerase echA1-21 AND 3-hydroxyacyl-CoA dehydrogenase fadB2-5 AND acetyl-CoA C-acetyltransferase fadA2-6	fadE21	552, 553, 554, 555, 556, 557, 558, 559, 560, 561, 562, 563, 564, 565, 566, 567, 568, 569, 570, 575, 576, 577, 578, 579, 580, 581, 582	beta oxidation of fatty acids	β oxidation of fatty acids	1.3.99.3 AND 4.2.1.17 AND 1.1.1.35 AND 2.3.1.16	0.107234	NE	1.12697	NE	TN	0.23654	NE	TN
BCG_2812c	Rv2794c	holo-[acyl-carrier-protein] synthase acpS OR 'hypothetical' withy 4'-phosphopantetheinyl transferase region, pptA - artificial reaction	-	398	Cofactor biosynthesis, ACP biosynthesis	Cofactor biosynthesis	2.7.8.7	0.107234	NE	no-data	no-data	no-data	0.00903	E	FN
BCG_2851	Rv2831	acyl-CoA dehydrogenase fadE1-36 AND enoyl-CoA hydratase/isomerase echA1-21 AND 3-hydroxyacyl-CoA dehydrogenase fadB2-5 AND acetyl-CoA C-acetyltransferase fadA2-6	echA16	552, 553, 554, 555, 556, 557, 558, 559, 560, 561, 562, 563, 564, 565, 566, 567, 568, 569, 570, 575, 576, 577, 578, 579, 580, 581, 582	beta oxidation of fatty acids	β oxidation of fatty acids	1.3.99.3 AND 4.2.1.17 AND 1.1.1.35 AND 2.3.1.16	0.107234	NE	0.554482	NE	TN	0.19859	NE	TN
BCG_2867c	Rv2847c	Probable siroheme synthase, cysG2, OR possible uroporphyrin-III c-methyltransferase / Uroporphyrinogen-III synthase cysG	cysG	440	Cofactor biosynthesis, cobalamin biosynthesis	Cofactor biosynthesis	2.1.1.107	0.107234	NE	no-data	no-data	no-data	2e-05	E	FN
BCG_2868c	Rv2848c	probable cobyrinicacid a,c-diamide synthase , cobB	cobB	449	Cofactor biosynthesis, cobalamin biosynthesis	Cofactor biosynthesis	6.3.5.9	0.107234	NE	0.76932	NE	TN	0.96172	NE	TN
BCG_2869c	Rv2849c	probable cob(i)alamin adenosyltransferase, cobA	cobO	452	Cofactor biosynthesis, cobalamin biosynthesis	Cofactor biosynthesis	2.5.1.-	0.107234	NE	0.752552	NE	TN	0.31477	NE	TN
BCG_2874	Rv2854	-	-	574	Acylglycerol catabolism, Monoacylglyceride	Lipid biosynthesis	3.1.1.23	0.107234	NE	1.03899	NE	TN	0.43406	NE	TN
BCG_2880c	Rv2858c	glyceraldehyde dehydrogenase aldC	aldC	5	C3 compounds, glyceraldehyde	Central carbon metabolism	1.2.1.3	0.107234	NE	no-data	no-data	no-data	0.10558	NE	TN
BCG_2882c	Rv2860c	glutamine synthetase glnA1, glnA3, glnA4	glnA4	196	Amino acid biosynthesis, Glutamate family, Glutamate/glutamine	Amino acid metabolism	6.3.1.2	0.107234	NE	0.606826	NE	TN	0.97956	NE	TN
BCG_2890c	Rv2868c	4-hydroxy-3-methylbut-2-en-1-yl diphosphate synthase	ispG	683	Polyprenoids biosynthesis	Other	1.17.4.3	0	E	no-data	no-data	no-data	0.00178	E	TP
BCG_2892c	Rv2870c	1-deoxy-D-xylulose-5-phosphate reductoisomerase	dxr	679	Polyprenoids biosynthesis	Other	1.1.1.267	0	E	0.252508	NE	FP	0.00051	E	TP
BCG_2902c	Rv2881c	phosphatidate cytidylyltransferase	cdsA	588, 596	Phospholipid synthesis, Synthesis of Phosphatidylethanolamine	Lipid biosynthesis	2.7.7.41	0	E	0.119327	E	TP	0.00304	E	TP
BCG_2921c	Rv2900c	formate dehydrogenase fdhF	fdhF	32	Organic Acids	Other	1.2.1.2	0	E	no-data	no-data	no-data	0.6588	NE	FP
BCG_2944c	Rv2922A	acylphosphatase	acyP	77	Pyruvate metabolism	Other	3.6.1.7	0.107234	NE	no-data	no-data	no-data	0.39346	NE	TN
BCG_2952	Rv2930	acyl-CoA dehydrogenase fadE1-36 AND enoyl-CoA hydratase/isomerase echA1-21 AND 3-hydroxyacyl-CoA dehydrogenase fadB2-5 AND acetyl-CoA C-acetyltransferase fadA2-11	fadD26	537, 538, 539, 540, 541, 542, 543, 544, 545, 546, 547, 548, 549, 550, 551, 656	beta oxidation of fatty acids	β oxidation of fatty acids	1.3.99.3 AND 4.2.1.17 AND 1.1.1.35 AND 2.3.1.16	0.107234	NE	1.04751	NE	TN	0.0772	NE	TN
BCG_2953	Rv2931	pthiocerol synthase ppsA - ppsE, phenolpthiocerol synthase ppsA - ppsE, fadD26, fadD28, pks7	ppsA	651	Synthesis of Phthiocerol and Phenolphthiocerol, PHTHIODIOLONE-A synthesis	Lipid biosynthesis	-	0.107234	NE	no-data	no-data	no-data	0.99996	NE	TN
BCG_2954	Rv2932	pthiocerol synthase ppsA - ppsE, phenolpthiocerol synthase ppsA - ppsE, fadD26, fadD28, pks7	ppsB	651	Synthesis of Phthiocerol and Phenolphthiocerol, PHTHIODIOLONE-A synthesis	Lipid biosynthesis	-	0.107234	NE	no-data	no-data	no-data	0.67607	NE	TN
BCG_2955	Rv2933	pthiocerol synthase ppsA - ppsE, phenolpthiocerol synthase ppsA - ppsE, fadD26, fadD28, pks7	ppsC	651	Synthesis of Phthiocerol and Phenolphthiocerol, PHTHIODIOLONE-A synthesis	Lipid biosynthesis	-	0.107234	NE	0.474141	NE	TN	0.99497	NE	TN
BCG_2956	Rv2934	pthiocerol synthase ppsA - ppsE, phenolpthiocerol synthase ppsA - ppsE, fadD26, fadD28, pks7	ppsD	651	Synthesis of Phthiocerol and Phenolphthiocerol, PHTHIODIOLONE-A synthesis	Lipid biosynthesis	-	0.107234	NE	no-data	no-data	no-data	0.98621	NE	TN
BCG_2957	Rv2935	pthiocerol synthase ppsA - ppsE, phenolpthiocerol synthase ppsA - ppsE, fadD26, fadD28, pks7	ppsE	651	Synthesis of Phthiocerol and Phenolphthiocerol, PHTHIODIOLONE-A synthesis	Lipid biosynthesis	-	0.107234	NE	no-data	no-data	no-data	0.9998	NE	TN
BCG_2958	RV2936	RND permease, mmpL7 AND drrABC transporter, CDP-diacylglycerol-glycerol-3-phosphate 3-phosphatidyltransferase	drrA	DIM, 660	Synthesis of Phthiocerol and Phenolphthiocerol, phenolphthiocerol dimycocerosate (PDIM) synthesis	Lipid biosynthesis	2.7.8.5	0.107234	NE	3.29191	NE	TN	0.90786	NE	TN
BCG_2959	Rv2937	RND permease, mmpL7 AND drrABC transporter, CDP-diacylglycerol-glycerol-3-phosphate 3-phosphatidyltransferase	drrB	DIM, 660	Synthesis of Phthiocerol and Phenolphthiocerol, phenolphthiocerol dimycocerosate (PDIM) synthesis	Lipid biosynthesis	2.7.8.5	0.107234	NE	1.20287	NE	TN	0.30591	NE	TN
BCG_2960	Rv2938	RND permease, mmpL7 AND drrABC transporter, CDP-diacylglycerol-glycerol-3-phosphate 3-phosphatidyltransferase	drrC	DIM, 660	Synthesis of Phthiocerol and Phenolphthiocerol, phenolphthiocerol dimycocerosate (PDIM) synthesis	Lipid biosynthesis	2.7.8.5	0.107234	NE	4.4212	NE	TN	0.96172	NE	TN
BCG_2961	Rv2939	polyketide-associated protein, papA5	papA5	654, 659	Synthesis of Phthiocerol and Phenolphthiocerol, phthiocerol dimycocerosate (DIM) synthesis	Lipid biosynthesis	-	0.107234	NE	0.608539	NE	TN	0.8391	NE	TN
BCG_2962c	Rv2940c	Mycocerosic acid synthase, mas	mas	645, 646, 649	lipid biosynthesis, synthesis of branched fatty acids, synthesis of mycocerosic acid	Lipid biosynthesis	-	0	E	0.734981	NE	FP	0.99997	NE	FP
BCG_2963	Rv2941	acyl-CoA dehydrogenase fadE1-36 AND enoyl-CoA hydratase/isomerase echA1-21 AND 3-hydroxyacyl-CoA dehydrogenase fadB2-5 AND acetyl-CoA C-acetyltransferase fadA2-11	fadD28	537, 538, 539, 540, 541, 542, 543, 544, 545, 546, 547, 548, 549, 550, 551, 644, 656	beta oxidation of fatty acids	β oxidation of fatty acids	1.3.99.3 AND 4.2.1.17 AND 1.1.1.35 AND 2.3.1.16	0.107234	NE	no-data	no-data	no-data	0.77382	NE	TN
BCG_2964	Rv2942	RND permease, mmpL7 AND drrABC transporter, CDP-diacylglycerol-glycerol-3-phosphate 3-phosphatidyltransferase	mmpL7	DIM, 660	Synthesis of Phthiocerol and Phenolphthiocerol, phenolphthiocerol dimycocerosate (PDIM) synthesis	Lipid biosynthesis	2.7.8.5	0.107234	NE	1.99289	NE	TN	0.92907	NE	TN
BCG_2968c	Rv2946c	polyketide synthase, pks15/1, frameshift in H37Rv	pks1	655	Synthesis of Phthiocerol and Phenolphthiocerol, phenolpthiocerol (PPTC) synthesis	Lipid biosynthesis	-	0.107234	NE	1.24153	NE	TN	0.99834	NE	TN
BCG_2969c	Rv2948c	acyl-CoA dehydrogenase fadE1-36 AND enoyl-CoA hydratase/isomerase echA1-21 AND 3-hydroxyacyl-CoA dehydrogenase fadB2-5 AND acetyl-CoA C-acetyltransferase fadA2-11	fadD22	537, 538, 539, 540, 541, 542, 543, 544, 545, 546, 547, 548, 549, 550, 551	beta oxidation of fatty acids	β oxidation of fatty acids	1.3.99.3 AND 4.2.1.17 AND 1.1.1.35 AND 2.3.1.16	0.107234	NE	2.09278	NE	TN	0.95139	NE	TN
BCG_2970c	Rv2949c	chorismate pyruvate-lyase	-	650	Synthesis of Phthiocerol and Phenolphthiocerol, p-hydroxybenzoic acid (HBA) synthesis	Lipid biosynthesis	4.-.-.-	0.107234	NE	0.437108	NE	TN	0.04322	E	FN
BCG_2971c	Rv2950c	acyl-CoA dehydrogenase fadE1-36 AND enoyl-CoA hydratase/isomerase echA1-21 AND 3-hydroxyacyl-CoA dehydrogenase fadB2-5 AND acetyl-CoA C-acetyltransferase fadA2-11	fadD29	537, 538, 539, 540, 541, 542, 543, 544, 545, 546, 547, 548, 549, 550, 551	beta oxidation of fatty acids	β oxidation of fatty acids	1.3.99.3 AND 4.2.1.17 AND 1.1.1.35 AND 2.3.1.16	0.107234	NE	2.01738	NE	TN	0.94487	NE	TN
BCG_2972c	Rv2951c	phthiodiolone reductase	-	652, 657	Synthesis of Phthiocerol and Phenolphthiocerol, PTT synthesis	Lipid biosynthesis	1.-.-.-	0.107234	NE	2.39766	NE	TN	0.9508	NE	TN
BCG_2973	Rv2952	methyltransferase	-	653, 658	Synthesis of Phthiocerol and Phenolphthiocerol, phthiocerol (PTC) synthesis	Lipid biosynthesis	2.1.1.-	0.107234	NE	0.933133	NE	TN	0.63505	NE	TN
BCG_2980c	Rv2959c	methyltransferase	-	663, 666	Phenolic Glycolipid synthesis	Lipid biosynthesis	2.1.1.-	0.107234	NE	no-data	no-data	no-data	0.39833	NE	TN
BCG_2983c	Rv2962c	glycosyl transferase	-	661, 664	Phenolic Glycolipid synthesis	Lipid biosynthesis	2.4.1.-	0.107234	NE	0.927761	NE	TN	0.93677	NE	TN
BCG_2986c	Rv2965c	pantetheine-phosphate adenylyltransferase	coaD	396	Cofactor biosynthesis, Coenzyme-A biosynthesis	Cofactor biosynthesis	2.7.7.3	0	E	0.675168	NE	FP	0.14626	NE	FP
BCG_2988c	Rv2967c	pyruvate carboxylase	pca	100	Anapleurotic reactions	Central carbon metabolism	6.4.1.1	0.106579	NE	0.193861	E	FN	0.11885	NE	TN
BCG_2991c	Rv2970c	Probable Phospholipases	lipN	590	Inositol phosphate metabolism, Glycerophospholipid metabolism	Lipid biosynthesis	3.1.4.3	0.107234	NE	0.931208	NE	TN	0.88157	NE	TN
BCG_3002c	Rv2981c	D-alanine-D-alanine ligase	ddl	699	synthesis of arabinogalactan (incomplete), 4.4 PEPTIDOGLYCAN PRECURSORS BIOSYNTHESIS (Ingraham et al, 1983), p.112, D-alanyl-D-alanine synthesis	Cell wall syntheisis	6.3.2.4	0	E	0.0998898	E	TP	0.00045	E	TP
BCG_3003c	Rv2982c	glycerol-3-phosphate dehydrogenase gpdA1	gpsA	591	Phospholipid synthesis, synthesis of phophatidlyglycerol	Lipid biosynthesis	1.1.1.94	0.107234	NE	0.762494	NE	TN	0.96122	NE	TN
BCG_3005	Rv2984	polyphosphate kinase	ppk	131, 132	Energy metabolism	Other	3.6.1.1	0.107234	NE	no-data	no-data	no-data	0	E	FN
BCG_3008c	Rv2987c	3-isopropylmalate dehydratase (large subunit leuC AND small subunit leuD)	leuD	221	Amino acid biosynthesis, Branched chain amino acids, Leucine	Amino acid metabolism	4.2.1.33	0	E	0.0585701	E	TP	0.01003	E	TP
BCG_3009c	Rv2988c	3-isopropylmalate dehydratase (large subunit leuC AND small subunit leuD)	leuC	221	Amino acid biosynthesis, Branched chain amino acids, Leucine	Amino acid metabolism	4.2.1.33	0	E	no-data	no-data	no-data	0.00083	E	TP
BCG_3013c	Rv2992c	glutamyl-tRNA synthase, gltS	gltX	428	Cofactor biosynthesis, heme biosynthesis	Cofactor biosynthesis	6.1.1.17	0	E	0.0503807	E	TP	2e-05	E	TP
BCG_3016c	Rv2995c	3-isopropylmalate dehydrogenase	leuB	222	Amino acid biosynthesis, Branched chain amino acids, Leucine	Amino acid metabolism	1.1.1.85	0	E	0.140095	E	TP	0.00903	E	TP
BCG_3017c	Rv2996c	phosphoglycerate dehydrogenase	serA1	247	Amino acid biosynthesis, The serine family, Serine	Amino acid metabolism	1.1.1.95	0	E	0.0708889	E	TP	0.00279	E	TP
BCG_3023c	Rv3001c	ketol-acid reductoisomerase ilvC	ilvC	212, 217	Amino acid biosynthesis, Branched chain amino acids, Valine	Amino acid metabolism	1.1.1.86	0	E	0.0745882	E	TP	0.0009	E	TP
BCG_3024c	Rv3002c	acetolactate synthase	ilvH	211	Amino acid biosynthesis, Branched chain amino acids, Valine	Amino acid metabolism	2.2.1.6 and 4.1.3.18	0.10329	NE	0.0467493	E	FN	0.14626	NE	TN
BCG_3025c	Rv3003c	acetolactate synthase	ilvB1	211	Amino acid biosynthesis, Branched chain amino acids, Valine	Amino acid metabolism	2.2.1.6 and 4.1.3.18	0.10329	NE	0.0302025	E	FN	0.00024	E	FN
BCG_3032c	Rv3010c	6-phosphofructokinase, pfkA or pfkB	pfkA	41	Glycolysis	Central carbon metabolism	2.7.1.11	0.107234	NE	0.858397	NE	TN	0.74854	NE	TN
BCG_3048c	Rv3025c	probably molybdopterin biosynthesis protein MoeB + cysteine desulfurase csdB	iscS	460	Cofactor biosynthesis, molybdopterin biosynthesis	Cofactor biosynthesis	2.8.1.7	0	E	0.0402205	E	TP	7e-05	E	TP
BCG_3051c	Rv3028c	aa3-type cytochrome c oxidase, ctaCDE AND cytochrome bc1	fixB	126	Energy metabolism	Other	1.10.3.-	0.0936986	NE	no-data	no-data	no-data	0.00304	E	FN
BCG_3052c	Rv3029c	aa3-type cytochrome c oxidase, ctaCDE AND cytochrome bc1	fixA	126	Energy metabolism	Other	1.10.3.-	0.0936986	NE	0.175086	E	FN	0.00903	E	FN
BCG_3063c	Rv3039c	acyl-CoA dehydrogenase fadE1-36 AND enoyl-CoA hydratase/isomerase echA1-21 AND 3-hydroxyacyl-CoA dehydrogenase fadB2-5 AND acetyl-CoA C-acetyltransferase fadA2-6	echA17	552, 553, 554, 555, 556, 557, 558, 559, 560, 561, 562, 563, 564, 565, 566, 567, 568, 569, 570, 575, 576, 577, 578, 579, 580, 581, 582	beta oxidation of fatty acids	β oxidation of fatty acids	1.3.99.3 AND 4.2.1.17 AND 1.1.1.35 AND 2.3.1.16	0.107234	NE	no-data	no-data	no-data	0.01103	E	FN
BCG_3066c	Rv3042c	phosphoserine phosphatase	serB2	249	Amino acid biosynthesis, The serine family, Serine	Amino acid metabolism	3.1.3.3	0	E	0.117397	E	TP	0.00304	E	TP
BCG_3067c	Rv3043c	aa3-type cytochrome c oxidase, ctaCDE AND cytochrome bc1	ctaD	126	Energy metabolism	Other	1.10.3.-	0.0936986	NE	0.0580148	E	FN	0	E	FN
BCG_3069	Rv3045	alcohol dehydrogenase (nadp dependent) adhC	adhC	74	Pyruvate metabolism	Other	1.1.1.1	0.107234	NE	1.17923	NE	TN	0.71635	NE	TN
BCG_3072c	Rv3048c	ribonucleoside-diphosphate reductase, nrdE and nrdF2	nrdF2	297, 330, 352, 359	Nucleotide biosynthesis, de novo biosynthesis of pyrimidine ribonucleotides	Nucleotide biosynthesis	1.17.4.1	0.107219	NE	0.191796	E	FN	0	E	FN
BCG_3075c	Rv3051c	ribonucleoside-diphosphate reductase, nrdE and nrdF2	nrdE	297, 330, 352, 359	Nucleotide biosynthesis, de novo biosynthesis of pyrimidine ribonucleotides	Nucleotide biosynthesis	1.17.4.1	0.107219	NE	0.0431512	E	FN	0	E	FN
BCG_3086c	Rv3061c	acyl-CoA dehydrogenase fadE1-36 AND enoyl-CoA hydratase/isomerase echA1-21 AND 3-hydroxyacyl-CoA dehydrogenase fadB2-5 AND acetyl-CoA C-acetyltransferase fadA2-6	fadE22	552, 553, 554, 555, 556, 557, 558, 559, 560, 561, 562, 563, 564, 565, 566, 567, 568, 569, 570, 575, 576, 577, 578, 579, 580, 581, 582	beta oxidation of fatty acids	β oxidation of fatty acids	1.3.99.3 AND 4.2.1.17 AND 1.1.1.35 AND 2.3.1.16	0.107234	NE	0.72208	NE	TN	0.53188	NE	TN
BCG_3093c	Rv3068c	phosphoglucomutase	pgmA	338b, 38, 715, 92	Nucleotide biosynthesis, Purines	Nucleotide biosynthesis	5.4.2.2	0	E	1.2158	NE	FP	0.98197	NE	FP
BCG_3109	Rv3084	Probable Phospholipases	lipR	590	Inositol phosphate metabolism, Glycerophospholipid metabolism	Lipid biosynthesis	3.1.4.3	0.107234	NE	0.72959	NE	TN	0.9698	NE	TN
BCG_3112	Rv3087	triacylglycerol synthase	-	TAG	triglyceride synthesis	Lipid biosynthesis	2.3.1.75	0.107234	NE	0.512488	NE	TN	0.99906	NE	TN
BCG_3113	Rv3088	triacylglycerol synthase	-	TAG	triglyceride synthesis	Lipid biosynthesis	2.3.1.75	0.107234	NE	0.725947	NE	TN	0.96122	NE	TN
BCG_3114	Rv3089	acyl-CoA dehydrogenase fadE1-36 AND enoyl-CoA hydratase/isomerase echA1-21 AND 3-hydroxyacyl-CoA dehydrogenase fadB2-5 AND acetyl-CoA C-acetyltransferase fadA2-11	fadD13	537, 538, 539, 540, 541, 542, 543, 544, 545, 546, 547, 548, 549, 550, 551	beta oxidation of fatty acids	β oxidation of fatty acids	1.3.99.3 AND 4.2.1.17 AND 1.1.1.35 AND 2.3.1.16	0.107234	NE	1.66646	NE	TN	0.93677	NE	TN
BCG_3122c	Rv3097c	Probable Triacylglycerol Lipase	lipY	572	Acylglycerol catabolism, Triacylglyceride	Lipid biosynthesis	3.1.1.3	0.107234	NE	1.74299	NE	TN	0.99909	NE	TN
BCG_3131	Rv3106	ferredoxin-NADP reductase fprA, fprB, fdR	fprA	124, 133	Energy metabolism	Other	1.16.1.7 and 2.7.4.1	0	E	1.63972	NE	FP	0.67826	NE	FP
BCG_3134	Rv3109	probably precursor Z biosynthesis protein complex MoaABC	moaA1	461	Cofactor biosynthesis, molybdopterin biosynthesis	Cofactor biosynthesis	-	0.107234	NE	0.074066	E	FN	0.00017	E	FN
BCG_3136	Rv3111	probably precursor Z biosynthesis protein complex MoaABC	moaC	461	Cofactor biosynthesis, molybdopterin biosynthesis	Cofactor biosynthesis	-	0.107234	NE	0.185399	E	FN	0.02773	E	FN
BCG_3141	Rv3116	probably precursor Z biosynthesis protein complex MoaABC	moeB2	461	Cofactor biosynthesis, molybdopterin biosynthesis	Cofactor biosynthesis	-	0.107234	NE	0.618612	NE	TN	0.97373	NE	TN
BCG_3153c	Rv3130c	triacylglycerol synthase	tgs1	TAG	triglyceride synthesis	Lipid biosynthesis	2.3.1.75	0.107234	NE	no-data	no-data	no-data	0.80563	NE	TN
BCG_3162	Rv3139	acyl-CoA dehydrogenase fadE1-36 AND enoyl-CoA hydratase/isomerase echA1-21 AND 3-hydroxyacyl-CoA dehydrogenase fadB2-5 AND acetyl-CoA C-acetyltransferase fadA2-6	fadE24	552, 553, 554, 555, 556, 557, 558, 559, 560, 561, 562, 563, 564, 565, 566, 567, 568, 569, 570, 575, 576, 577, 578, 579, 580, 581, 582	beta oxidation of fatty acids	β oxidation of fatty acids	1.3.99.3 AND 4.2.1.17 AND 1.1.1.35 AND 2.3.1.16	0.107234	NE	0.121265	E	FN	0.51684	NE	TN
BCG_3163	Rv3140	acyl-CoA dehydrogenase fadE1-36 AND enoyl-CoA hydratase/isomerase echA1-21 AND 3-hydroxyacyl-CoA dehydrogenase fadB2-5 AND acetyl-CoA C-acetyltransferase fadA2-6	fadE23	86, 152, 162, 170, 552, 553, 554, 555, 556, 557, 558, 559, 560, 561, 562, 563, 564, 565, 566, 567, 568, 569, 570, 575, 576, 577, 578, 579, 580, 581, 582, 86	beta oxidation of fatty acids	β oxidation of fatty acids	1.3.99.3 AND 4.2.1.17 AND 1.1.1.35 AND 2.3.1.16	0.103955	NE	0.0557228	E	FN	0.0769	NE	TN
BCG_3164	Rv3141	acyl-CoA dehydrogenase fadE1-36 AND enoyl-CoA hydratase/isomerase echA1-21 AND 3-hydroxyacyl-CoA dehydrogenase fadB2-5 AND acetyl-CoA C-acetyltransferase fadA2-6	fadB4	552, 553, 554, 555, 556, 557, 558, 559, 560, 561, 562, 563, 564, 565, 566, 567, 568, 569, 570, 575, 576, 577, 578, 579, 580, 581, 582	beta oxidation of fatty acids	β oxidation of fatty acids	1.3.99.3 AND 4.2.1.17 AND 1.1.1.35 AND 2.3.1.16	0.107234	NE	0.572569	NE	TN	0.65733	NE	TN
BCG_3168	Rv3145	type I NADH dehydrogenase, nuoA-N	nuoA	119	Energy metabolism	Other	1.6.5.3	0.104853	NE	2.21818	NE	TN	0.53046	NE	TN
BCG_3169	Rv3146	type I NADH dehydrogenase, nuoA-N	nuoB	119	Energy metabolism	Other	1.6.5.3	0.104853	NE	1.07773	NE	TN	0.6768	NE	TN
BCG_3170	Rv3147	type I NADH dehydrogenase, nuoA-N	nuoC	119	Energy metabolism	Other	1.6.5.3	0.104853	NE	no-data	no-data	no-data	0.58605	NE	TN
BCG_3171	Rv3148	type I NADH dehydrogenase, nuoA-N	nuoD	119	Energy metabolism	Other	1.6.5.3	0.104853	NE	no-data	no-data	no-data	9e-05	E	FN
BCG_3172	Rv3149	type I NADH dehydrogenase, nuoA-N	nuoE	119	Energy metabolism	Other	1.6.5.3	0.104853	NE	1.05268	NE	TN	0.6768	NE	TN
BCG_3173	Rv3150	type I NADH dehydrogenase, nuoA-N	nuoF	119	Energy metabolism	Other	1.6.5.3	0.104853	NE	1.05998	NE	TN	0.02489	E	FN
BCG_3174	Rv3151	type I NADH dehydrogenase, nuoA-N	nuoG	119	Energy metabolism	Other	1.6.5.3	0.104853	NE	no-data	no-data	no-data	0.05847	NE	TN
BCG_3175	Rv3152	type I NADH dehydrogenase, nuoA-N	nuoH	119	Energy metabolism	Other	1.6.5.3	0.104853	NE	1.52408	NE	TN	0.05468	NE	TN
BCG_3176	Rv3153	type I NADH dehydrogenase, nuoA-N	nuoI	119	Energy metabolism	Other	1.6.5.3	0.104853	NE	2.10189	NE	TN	0.16083	NE	TN
BCG_3177	Rv3154	type I NADH dehydrogenase, nuoA-N	nuoJ	119	Energy metabolism	Other	1.6.5.3	0.104853	NE	0.519113	NE	TN	0.91791	NE	TN
BCG_3178	Rv3155	type I NADH dehydrogenase, nuoA-N	nuoK	119	Energy metabolism	Other	1.6.5.3	0.104853	NE	1.19027	NE	TN	0.31477	NE	TN
BCG_3179	Rv3156	type I NADH dehydrogenase, nuoA-N	nuoL	119	Energy metabolism	Other	1.6.5.3	0.104853	NE	1.21136	NE	TN	0.24342	NE	TN
BCG_3180	Rv3157	type I NADH dehydrogenase, nuoA-N	nuoM	119	Energy metabolism	Other	1.6.5.3	0.104853	NE	0.590932	NE	TN	0.00013	E	FN
BCG_3181	Rv3158	type I NADH dehydrogenase, nuoA-N	nuoN	119	Energy metabolism	Other	1.6.5.3	0.104853	NE	2.01594	NE	TN	0.98197	NE	TN
BCG_3224c	Rv3176c	Probable Phospholipases	mesT	590	Inositol phosphate metabolism, Glycerophospholipid metabolism	Lipid biosynthesis	3.1.4.3	0.107234	NE	0.421847	NE	TN	0.35774	NE	TN
BCG_3229c	Rv3199c	Probable NADH Pyrophosphatase nudC	nudC	380	Cofactor biosynthesis, NAD salvage pathway II	Cofactor biosynthesis	3.6.1.22	0.107234	NE	1.28754	NE	TN	0.86466	NE	TN
BCG_3232c	Rv3206c	probably molybdopterin biosynthesis protein MoeB + cysteine desulfurase csdB	moeB1	460	Cofactor biosynthesis, molybdopterin biosynthesis	Cofactor biosynthesis	-	0.107234	NE	0.602361	NE	TN	0	E	FN
BCG_3263c	Rv3234c	triacylglycerol synthase	-	TAG	triglyceride synthesis	Lipid biosynthesis	2.3.1.75	0.107234	NE	1.69456	NE	TN	0.89554	NE	TN
BCG_3276c	Rv3247c	dTMP kinase	tmk	304	Nucleotide biosynthesis, de novo biosynthesis of pyrimidine deoxyribonucleotides	Nucleotide biosynthesis	2.7.4.9	0	E	no-data	no-data	no-data	0.00505	E	TP
BCG_3277c	Rv3248c	adenosylhomocysteinase sahN	sahH	260	Amino acid biosynthesis, The serine family, Cysteine	Amino acid metabolism	3.3.1.1	0	E	0.0606703	E	TP	0	E	TP
BCG_3284	Rv3255c	mannose-6-phosphate isomerase manA	manA	11	C6 Compounds, mannose	Carbohydrate metabolism (excluding central metabolism)	5.3.1.8	0	E	0.0630418	E	TP	1e-05	E	TP
BCG_3286	Rv3257c	phosphomannomutase pmmA, pmmB	manB	12	C6 Compounds, mannose	Carbohydrate metabolism (excluding central metabolism)	5.4.2.8	0.107234	NE	0.0335169	E	FN	0	E	FN
BCG_3290	Rv3261	F420 biosynthesis proteins, Fbia AND FbiB: Coenzyme F420-0:L-glutamate ligase	fbiA	478, 479	Cofactor biosynthesis, F420 biosynthesis	Cofactor biosynthesis	-	0.107234	NE	0.425789	NE	TN	0.05447	NE	TN
BCG_3291	Rv3262	F420 biosynthesis proteins, Fbia AND FbiB: Coenzyme F420-0:L-glutamate ligase	fbiB	478	Cofactor biosynthesis, F420 biosynthesis	Cofactor biosynthesis	-	0.107234	NE	no-data	no-data	no-data	0.55913	NE	TN
BCG_3292	Rv3263	F420 biosynthesis proteins, Fbia AND FbiB: Coenzyme F420-0:L-glutamate ligase	-	479	Cofactor biosynthesis, F420 biosynthesis	Cofactor biosynthesis	-	0.107234	NE	0.652822	NE	TN	0.99945	NE	TN
BCG_3293	Rv3264c	mannose-1-phosphate guanylyltransferase manB	manB	13	C6 Compounds, mannose	Carbohydrate metabolism (excluding central metabolism)	2.7.7.-	0	E	0.136405	E	TP	7e-05	E	TP
BCG_3294c	Rv3265c	Rhamnosyl transferase wbbL, wbbL2	wbbL1	701	synthesis of arabinogalactan (incomplete)	Cell wall syntheisis	2.-.-.-	0.107234	NE	0.0551572	E	FN	0.00014	E	FN
BCG_3295c	Rv3266c	WhiB-like regulatory protein rmlD	rmlD	710	synthesis of arabinogalactan (incomplete), dTDP-Rhamnose Synthesis	Cell wall synthesis	1.1.1.133	0	E	no-data	no-data	no-data	7e-05	E	TP
BCG_3303c	Rv3274c	acyl-CoA dehydrogenase fadE1-36 AND enoyl-CoA hydratase/isomerase echA1-21 AND 3-hydroxyacyl-CoA dehydrogenase fadB2-5 AND acetyl-CoA C-acetyltransferase fadA2-6	fadE25	552, 553, 554, 555, 556, 557, 558, 559, 560, 561, 562, 563, 564, 565, 566, 567, 568, 569, 570, 575, 576, 577, 578, 579, 580, 581, 582	beta oxidation of fatty acids	β oxidation of fatty acids	1.3.99.3 AND 4.2.1.17 AND 1.1.1.35 AND 2.3.1.16	0.107234	NE	no-data	no-data	no-data	0.89554	NE	TN
BCG_3305c	Rv3276c	phosphoribosylaminoimidazole carboxylase	purK	318	Nucleotide biosynthesis, Purines	Nucleotide biosynthesis	4.1.1.21	0	E	no-data	no-data	no-data	0.01988	E	TP
BCG_3308c	Rv3279c	biotin—[acetyl-CoA-carboxylase] ligase, birA	birA	426	Cofactor biosynthesis, biotin biosynthesis	Cofactor biosynthesis	6.3.4.15	0.107234	NE	0.315384	NE	TN	0.02762	E	FN
BCG_3309	Rv3280	acetyl-CoA/propionyl-CoA carboxylase carboxytransferase subunit: 6 paralogues in Mtb: accD1, accD2, accD3, accD4, accD5, accD6, methylmalonyl-CoA decarboxylase	accD5	80, 156, 163, 495, 508, 80	Amino acid degradation, Branched chain amino acids, Isoleucine	Amino acid metabolism	6.4.1.4 and 6.4.1.3 and 6.4.1.2 and 4.1.1.41	0	E	no-data	no-data	no-data	0	E	TP
BCG_3313c	Rv3302c	glycerol-3-phosphate dehydrogenase glpD1, glpD2	glpD2	4	C3 compounds, Glycerol metabolism	Central carbon metabolism	1.1.99.5	0.107234	NE	no-data	no-data	no-data	0	E	FN
BCG_3314	Rv3285	acetyl/propionyl-CoA carboxylase alpha subunit encoding both biotin carboxylase and BCCP. Three paralogues in Mtb: accA1, accA2, accA3, hexacosanoyl-CoA carboxylase, accA3, accD4 and accD5	accA3	427, 508	Cofactor biosynthesis, biotin biosynthesis	Cofactor biosynthesis	6.3.4.14 and 6.4.1.2	0	E	0.0841312	E	TP	0	E	TP
BCG_3334	Rv3214	phosphoglycerate mutase gpm2, gpm1	endD	49	Glycolysis	Central carbon metabolism		0.107234	NE	3.34	NE	TN	0.55	NE	TN
BCG_3335	Rv3215	isochorismate synthase entC, mbt1	entC	412	Cofactor biosynthesis, Menaquinone biosynthesis	Cofactor biosynthesis	5.4.4.2	0.107234	NE	no-data	no-data	no-data	0.00013	E	FN
BCG_3350	Rv3227	3-phosphoshikimate 1-carboxyvinyltransferase	aroA	275	Amino acid biosynthesis, The aromatic family, The shikimate pathway	Amino acid metabolism	2.5.1.19	0	E	no-data	no-data	no-data	0.01594	E	TP
BCG_3367c	Rv3302c	glycerol-3-phosphate dehydrogenase glpD1, glpD2	glpD2	4	C3 compounds, Glycerol metabolism	Central carbon metabolism	1.1.99.5	0.107234	NE	no-data	no-data	no-data	0	E	FN
BCG_3368c	Rv3303c	dihydrolipoyl dehydrogenase lpd	lpdA	187	Amino acid degradation, The serine family, Glycine	Amino acid metabolism	1.8.1.4	0.107234	NE	0.739317	NE	TN	0.04322	E	FN
BCG_3372	Rv3307	purine-nucleoside phosphorylase	deoD	337, 338, 339, 340, 341, 342, 371, 372	Nucleotide biosynthesis, Purines	Nucleotide biosynthesis	2.4.2.1	0	E	1.40834	NE	FP	0.7782	NE	FP
BCG_3373	Rv3308	phosphomannomutase pmmA, pmmB	pmmB	12	C6 Compounds, mannose	Carbohydrate metabolism (excluding central metabolism)	5.4.2.8	0.107234	NE	1.4612	NE	TN	0.71635	NE	TN
BCG_3374c	Rv3309c	uracil phosphoribosyltransferase	upp	311, 312	Nucleotide biosynthesis, Pyrimidines	Nucleotide biosynthesis	2.4.2.9	0.107234	NE	0.610429	NE	TN	0.63358	NE	TN
BCG_3379c	Rv3313c	adenosine deaminase	add	344, 345	Nucleotide biosynthesis, Purines	Nucleotide biosynthesis	3.5.4.4	0.107234	NE	no-data	no-data	no-data	0.18649	NE	TN
BCG_3384	Rv3316	succinate dehydrogenase, sdhABCD, fumarate reductase, frdABCD	sdhC	122, 123	TCA cycle	Central carbon metabolism	1.3.99.1	0.0993782	NE	1.29811	NE	TN	0.77686	NE	TN
BCG_3385	Rv3317	succinate dehydrogenase, sdhABCD, fumarate reductase, frdABCD	sdhD	122, 123	TCA cycle	Central carbon metabolism	1.3.99.1	0.0993782	NE	0.629911	NE	TN	0.86358	NE	TN
BCG_3386	Rv3318	succinate dehydrogenase, sdhABCD, fumarate reductase, frdABCD	sdhA	122, 123	TCA cycle	Central carbon metabolism	1.3.99.1	0.0993782	NE	0.691021	NE	TN	0.39833	NE	TN
BCG_3387	Rv3319	succinate dehydrogenase, sdhABCD, fumarate reductase, frdABCD	sdhB	122, 123	TCA cycle	Central carbon metabolism	1.3.99.1	0.0993782	NE	0.514785	NE	TN	0.63358	NE	TN
BCG_3409c	Rv3339c	isocitrate dehydrogenase (NADP), icd1, icd2	icd1	58	Citrate cycle (TCA cycle)	Central carbon metabolism	1.1.1.42	0.107234	NE	0.791402	NE	TN	0.96624	NE	TN
BCG_3410	Rv3340	cystathionine beta-lyase	metC	241	Amino acid biosynthesis, The aspartate family, Methionine	Amino acid metabolism	4.4.1.8	0.107234	NE	0.352021	NE	TN	0.06575	NE	TN
BCG_3411	Rv3341	homoserine O-acetyltransferase metA	metX	252	Amino acid biosynthesis, The serine family, Cysteine	Amino acid metabolism	2.3.1.31	0.107234	NE	0.0470128	E	FN	0.00024	E	FN
BCG_3428c	Rv3356c	methylenetetrahydrofolate dehydrogenase (NADP), methenyltetrahydrofolate cyclohydrolase	folD	106, 107	One carbon pool by folate	Other	1.5.1.5, 3.5.4.9	0	E	0.17155	E	TP	0.00903	E	TP
BCG_3443	Rv3371	triacylglycerol synthase	-	TAG	triglyceride synthesis	Lipid biosynthesis	2.3.1.75	0.107234	NE	0.603605	NE	TN	0.51684	NE	TN
BCG_3444	Rv3372	trehalose-phosphatase otsB2	otsB2	31	Disaccharides, Trehalose	Carbohydrate metabolism (excluding central metabolism)	3.1.3.12	0.107234	NE	0.12032	E	FN	0.00903	E	FN
BCG_3445	Rv3373	acyl-CoA dehydrogenase fadE1-36 AND enoyl-CoA hydratase/isomerase echA1-21 AND 3-hydroxyacyl-CoA dehydrogenase fadB2-5 AND acetyl-CoA C-acetyltransferase fadA2-6	echA18	552, 553, 554, 555, 556, 557, 558, 559, 560, 561, 562, 563, 564, 565, 566, 567, 568, 569, 570, 575, 576, 577, 578, 579, 580, 581, 582	beta oxidation of fatty acids	β oxidation of fatty acids	1.3.99.3 AND 4.2.1.17 AND 1.1.1.35 AND 2.3.1.16	0.107234	NE	0.368738	NE	TN	0.77553	NE	TN
BCG_3450c	Rv3379c	1-deoxy-D-xylulose-5-phosphate synthase	dxs2	678	Polyprenoids biosynthesis	Other	2.2.1.7	0.107234	NE	0.498786	NE	TN	0.66942	NE	TN
BCG_3451c	Rv3382c	Probable LYTB-Related protein lytB1 & lytB2	lytB1	684	Polyprenoids biosynthesis	Other	-	0.107234	NE	0.394038	NE	TN	0.7782	NE	TN
BCG_3452c	Rv3383c	dimethylallyltranstransferase	idsB	686	Polyprenoids biosynthesis	Other		0.107234	NE	0.34	NE	TN	0.34	NE	TN
BCG_3466c	Rv3396c	GMP synthase	guaA	356	Nucleotide biosynthesis, Purines, GTP, dGTP	Nucleotide biosynthesis	6.3.5.2	0	E	0.0541611	E	TP	7e-05	E	TP
BCG_3468c	Rv3398c	dimethylallyltranstransferase, farnesyltranstransferase	idsA1	686, 688, 689	Polyprenoids biosynthesis	Other	2.5.1.1	0	E	0.083392	E	TP	0.29382	NE	FP
BCG_3470	Rv3400	possible beta-phosphoglucomutase and trehalosemonomycolatephosphate phosphatase	-	29, 642	C6 Compounds, Glucose	Central carbon metabolism	5.4.2.6 and 3.-.-.- or 3.1.3.12	0.107229	NE	1.30994	NE	TN	0.37774	NE	TN
BCG_3471	Rv3401	Maltose phosphorylase	-	28	Disaccharides, Trehalose	Carbohydrate metabolism (excluding central metabolism)	2.4.1.8	0.107229	NE	0.678968	NE	TN	0.98909	NE	TN
BCG_3480c	Rv3410c	IMP dehydrogenase guaB1, guaB2, guaB3	guaB3	355	Nucleotide biosynthesis, Purines, GTP, dGTP	Nucleotide biosynthesis	1.1.1.205	0	E	no-data	no-data	no-data	0.00045	E	TP
BCG_3481c	Rv3411c	IMP dehydrogenase guaB1, guaB2, guaB3	guaB2	355	Nucleotide biosynthesis, Purines, GTP, dGTP	Nucleotide biosynthesis	1.1.1.205	0	E	0.0762746	E	TP	0.00051	E	TP
BCG_3493c	Rv3423c	alanine racemase	alr	698	synthesis of arabinogalactan (incomplete), 4.4 PEPTIDOGLYCAN PRECURSORS BIOSYNTHESIS (Ingraham et al, 1983), p.112, D-alanyl-D-alanine synthesis	Cell wall syntheisis	5.1.1.1	0	E	0.0753736	E	TP	1e-05	E	TP
BCG_3498c	Rv3432c	glutamate decarboxylase gadB	gadB	135	Amino acid degradation, Glutamate family, Glutamate	Amino acid metabolism	1.11.1.6	0.107234	NE	1.50534	NE	TN	0.99682	NE	TN
BCG_3502c	Rv3436c	glutamine-fructose-6-phosphate transaminase	glmS	712	Peptidoglycan Synthesis, NAG and NAM biosynthesis	Cell wall syntheisis	2.6.1.16	0.107234	NE	0.123347	E	FN	0	E	FN
BCG_3529	Rv3464	dTDP-glucose-4,6-dehydratase rmlB/rmlB2/rmlB3/epiB	rmlB	708	synthesis of arabinogalactan (incomplete), dTDP-Rhamnose Synthesis	Cell wall syntheisis	4.2.1.46	0.107234	NE	0.123959	E	FN	0	E	FN
BCG_3530	Rv3465	dTDP-4-dehydrorhamnose 3,5-epimerase rmlC	rmlC	709	synthesis of arabinogalactan (incomplete), dTDP-Rhamnose Synthesis	Cell wall syntheisis	5.1.3.13	0	E	0.0897977	E	TP	0.01791	E	TP
BCG_3533c	Rv3468	dTDP-glucose-4,6-dehydratase rmlB/rmlB2/rmlB3/epiB	-	708	synthesis of arabinogalactan (incomplete), dTDP-Rhamnose Synthesis	Cell wall syntheisis	4.2.1.46	0.107234	NE	no-data	no-data	no-data	0.43406	NE	TN
BCG_3535c	Rv3470c	acetolactate synthase	ilvB2	216	Amino acid biosynthesis, Branched chain amino acids, Valine	Amino acid metabolism	2.2.1.6 and 4.1.3.18	0.107234	NE	no-data	no-data	no-data	0.14734	NE	TN
BCG_3544c	Rv3480c	triacylglycerol synthase	-	TAG	triglyceride synthesis	Lipid biosynthesis	2.3.1.75	0.107234	NE	no-data	no-data	no-data	0.97683	NE	TN
BCG_3551c	Rv3487c	Probable Phospholipases	lipF	590	Inositol phosphate metabolism, Glycerophospholipid metabolism	Lipid biosynthesis	3.1.4.3	0.107234	NE	2.40456	NE	TN	0.96122	NE	TN
BCG_3554	Rv3490	alpha,alpha-trehalose- phosphate synthase otsA	otsA	27	Trehalose synthesis	Carbohydrate metabolism (excluding central metabolism)	2.4.1.15	0	E	0.0730557	E	TP	0	E	TP
BCG_3558c	Rv3494c	cholesterol uptake (mce4 locus and supAB and mceG)	mce4F	932	Transport reaction	Transport reaction	-	0.107234	NE	1.61787	NE	TN	0.96172	NE	TN
BCG_3559c	Rv3495c	cholesterol uptake (mce4 locus and supAB and mceG)	lprN	932	Transport reaction	Transport reaction	-	0.107234	NE	0.756964	NE	TN	0.82743	NE	TN
BCG_3560c	Rv3496c	cholesterol uptake (mce4 locus and supAB and mceG)	mce4D	932	Transport reaction	Transport reaction	-	0.107234	NE	2.31764	NE	TN	0.80563	NE	TN
BCG_3561c	Rv3497c	cholesterol uptake (mce4 locus and supAB and mceG)	mce4C	932	Transport reaction	Transport reaction	-	0.107234	NE	0.617209	NE	TN	0.98889	NE	TN
BCG_3562c	Rv3498c	cholesterol uptake (mce4 locus and supAB and mceG)	mce4B	932	Transport reaction	Transport reaction	-	0.107234	NE	1.75978	NE	TN	0.74854	NE	TN
BCG_3563c	Rv3499c	cholesterol uptake (mce4 locus and supAB and mceG)	mce4A	932	Transport reaction	Transport reaction	-	0.107234	NE	1.37152	NE	TN	0.97956	NE	TN
BCG_3564c	Rv3500c	cholesterol uptake (mce4 locus and supAB and mceG)	yrbE4B	932	Transport reaction	Transport reaction	-	0.107234	NE	2.34512	NE	TN	0.94423	NE	TN
BCG_3565c	Rv3501c	cholesterol uptake (mce4 locus and supAB and mceG)	yrbE4A	932	Transport reaction	Transport reaction	-	0.107234	NE	0.742948	NE	TN	0.93607	NE	TN
BCG_3566c	Rv3502c	degradation of C and D rings - precise pathway unclear	Rv3502c	940	cholesterol degradation	Other		0.107234	NE	0.57	NE	TN	0.936	NE	TN
BCG_3568	Rv3504	acyl-CoA dehydrogenase fadE1-36 AND enoyl-CoA hydratase/isomerase echA1-21 AND 3-hydroxyacyl-CoA dehydrogenase fadB2-5 AND acetyl-CoA C-acetyltransferase fadA2-6	fadE26	552, 553, 554, 555, 556, 557, 558, 559, 560, 561, 562, 563, 564, 565, 566, 567, 568, 569, 570, 575, 576, 577, 578, 579, 580, 581, 582	beta oxidation of fatty acids	β oxidation of fatty acids	1.3.99.3 AND 4.2.1.17 AND 1.1.1.35 AND 2.3.1.16	0.107234	NE	1.58134	NE	TN	0.99326	NE	TN
BCG_3569	Rv3505	acyl-CoA dehydrogenase fadE1-36 AND enoyl-CoA hydratase/isomerase echA1-21 AND 3-hydroxyacyl-CoA dehydrogenase fadB2-5 AND acetyl-CoA C-acetyltransferase fadA2-6	fadE27	552, 553, 554, 555, 556, 557, 558, 559, 560, 561, 562, 563, 564, 565, 566, 567, 568, 569, 570, 575, 576, 577, 578, 579, 580, 581, 582	beta oxidation of fatty acids	β oxidation of fatty acids	1.3.99.3 AND 4.2.1.17 AND 1.1.1.35 AND 2.3.1.16	0.107234	NE	0.659137	NE	TN	0.3371	NE	TN
BCG_3570	Rv3506	acyl-CoA dehydrogenase fadE1-36 AND enoyl-CoA hydratase/isomerase echA1-21 AND 3-hydroxyacyl-CoA dehydrogenase fadB2-5 AND acetyl-CoA C-acetyltransferase fadA2-11	fadD17	537, 538, 539, 540, 541, 542, 543, 544, 545, 546, 547, 548, 549, 550, 551	beta oxidation of fatty acids	β oxidation of fatty acids	1.3.99.3 AND 4.2.1.17 AND 1.1.1.35 AND 2.3.1.16	0.107234	NE	0.753697	NE	TN	0.96172	NE	TN
BCG_3573c	Rv3509c	acetolactate synthase	ilvX	216	Amino acid biosynthesis, Branched chain amino acids, Valine	Amino acid metabolism	2.2.1.6 and 4.1.3.18	0.107234	NE	1.34217	NE	TN	0.94423	NE	TN
BCG_3576c	Rv3513c	acyl-CoA dehydrogenase fadE1-36 AND enoyl-CoA hydratase/isomerase echA1-21 AND 3-hydroxyacyl-CoA dehydrogenase fadB2-5 AND acetyl-CoA C-acetyltransferase fadA2-11	fadD18	537, 538, 539, 540, 541, 542, 543, 544, 545, 546, 547, 548, 549, 550, 551	beta oxidation of fatty acids	β oxidation of fatty acids	1.3.99.3 AND 4.2.1.17 AND 1.1.1.35 AND 2.3.1.16	0.107234	NE	1.95467	NE	TN	0.94961	NE	TN
BCG_3578c	Rv3515c	acyl-CoA dehydrogenase fadE1-36 AND enoyl-CoA hydratase/isomerase echA1-21 AND 3-hydroxyacyl-CoA dehydrogenase fadB2-5 AND acetyl-CoA C-acetyltransferase fadA2-11	fadD19	537, 538, 539, 540, 541, 542, 543, 544, 545, 546, 547, 548, 549, 550, 551	beta oxidation of fatty acids	β oxidation of fatty acids	1.3.99.3 AND 4.2.1.17 AND 1.1.1.35 AND 2.3.1.16	0.107234	NE	0.860628	NE	TN	0.92831	NE	TN
BCG_3579	Rv3516	acyl-CoA dehydrogenase fadE1-36 AND enoyl-CoA hydratase/isomerase echA1-21 AND 3-hydroxyacyl-CoA dehydrogenase fadB2-5 AND acetyl-CoA C-acetyltransferase fadA2-6	echA19	552, 553, 554, 555, 556, 557, 558, 559, 560, 561, 562, 563, 564, 565, 566, 567, 568, 569, 570, 575, 576, 577, 578, 579, 580, 581, 582	beta oxidation of fatty acids	β oxidation of fatty acids	1.3.99.3 AND 4.2.1.17 AND 1.1.1.35 AND 2.3.1.16	0.107234	NE	0.419761	NE	TN	0.63358	NE	TN
BCG_3586	Rv3522	cholesterol uptake (mce4 locus and supAB and mceG)	Rv3522	932	Transport reactions, cholesterol	Transport reaction		0.107234	NE	0.44	NE	TN	0.90786	NE	TN
BCG_3587	Rv3523	cholesterol uptake (mce4 locus and supAB and mceG)	Rv3523	932	Transport reactions, cholesterol	Transport reaction		0.107234	NE	0.55	NE	TN	0.90786	NE	TN
BCG_3590	Rv3526	KSH, 3-ketosteroid 9a-hydroxylase comprised of KshA (oxygenase) and KshB (oxygenase-reductase)	-	935	cholesterol degradation	Other	EC:1.14.1.-	0.107234	NE	0.523668	NE	TN	0.74993	NE	TN
BCG_3593c	Rv3529c	sulfotransferase	-	668	sulfolipid-1 (SL-1) synthesis, trehalose sulfate (TRE-S) synthesis	Lipid biosynthesis	-	0.107234	NE	no-data	no-data	no-data	0.56057	NE	TN
BCG_3598c	Rv3534c	degradation of 4-androstene-3,17-dione - precise pathway unclear	-	940	cholesterol degradation	Other	EC:4.1.3.-	0.107234	NE	1.27041	NE	TN	0.91791	NE	TN
BCG_3599c	Rv3535c	degradation of 4-androstene-3,17-dione - precise pathway unclear	-	940	cholesterol degradation	Other	EC:1.2.1.-	0.107234	NE	1.61927	NE	TN	0.95021	NE	TN
BCG_3600c	Rv3536c	degradation of 4-androstene-3,17-dione - precise pathway unclear	-	940	cholesterol degradation	Other	EC:4.2.1.-	0.107234	NE	no-data	no-data	no-data	0.8946	NE	TN
BCG_3601	Rv3537	3-ketosteroid-delta-1-dehydrogenase, kstD	-	934	cholesterol degradation	Other	EC:1.3.99.4	0.107234	NE	no-data	no-data	no-data	0.07162	NE	TN
BCG_3602	Rv3538	degradation of C and D rings - precise pathway unclear	ufaA2	939	cholesterol degradation	Other		0.107234	NE	0.14	E	FN	0.337	NE	TN
BCG_3607c	Rv3543c	acyl-CoA dehydrogenase fadE1-36 AND enoyl-CoA hydratase/isomerase echA1-21 AND 3-hydroxyacyl-CoA dehydrogenase fadB2-5 AND acetyl-CoA C-acetyltransferase fadA2-6	fadE29	552, 553, 554, 555, 556, 557, 558, 559, 560, 561, 562, 563, 564, 565, 566, 567, 568, 569, 570, 575, 576, 577, 578, 579, 580, 581, 582, 746	beta oxidation of fatty acids	β oxidation of fatty acids	1.3.99.3 AND 4.2.1.17 AND 1.1.1.35 AND 2.3.1.16	0.107234	NE	0.47922	NE	TN	0.23654	NE	TN
BCG_3608c	Rv3544c	acyl-CoA dehydrogenase fadE1-36 AND enoyl-CoA hydratase/isomerase echA1-21 AND 3-hydroxyacyl-CoA dehydrogenase fadB2-5 AND acetyl-CoA C-acetyltransferase fadA2-6	fadE28	552, 553, 554, 555, 556, 557, 558, 559, 560, 561, 562, 563, 564, 565, 566, 567, 568, 569, 570, 575, 576, 577, 578, 579, 580, 581, 582, 746	beta oxidation of fatty acids	β oxidation of fatty acids	1.3.99.3 AND 4.2.1.17 AND 1.1.1.35 AND 2.3.1.16	0.107234	NE	1.25074	NE	TN	0.86574	NE	TN
BCG_3610	Rv3546	acyl-CoA dehydrogenase fadE1-36 AND enoyl-CoA hydratase/isomerase echA1-21 AND 3-hydroxyacyl-CoA dehydrogenase fadB2-5 AND acetyl-CoA C-acetyltransferase fadA2-6	fadA5	552, 553, 554, 555, 556, 557, 558, 559, 560, 561, 562, 563, 564, 565, 566, 567, 568, 569, 570, 575, 576, 577, 578, 579, 580, 581, 582, 741, 745	beta oxidation of fatty acids	β oxidation of fatty acids	1.3.99.3 AND 4.2.1.17 AND 1.1.1.35 AND 2.3.1.16	0.107234	NE	1.053	NE	TN	0.77686	NE	TN
BCG_3614	Rv3550	acyl-CoA dehydrogenase fadE1-36 AND enoyl-CoA hydratase/isomerase echA1-21 AND 3-hydroxyacyl-CoA dehydrogenase fadB2-5 AND acetyl-CoA C-acetyltransferase fadA2-6	echA20	552, 553, 554, 555, 556, 557, 558, 559, 560, 561, 562, 563, 564, 565, 566, 567, 568, 569, 570, 575, 576, 577, 578, 579, 580, 581, 582	beta oxidation of fatty acids	β oxidation of fatty acids	1.3.99.3 AND 4.2.1.17 AND 1.1.1.35 AND 2.3.1.16	0.107234	NE	0.431701	NE	TN	0.52904	NE	TN
BCG_3620c	Rv3556c	acyl-CoA dehydrogenase fadE1-36 AND enoyl-CoA hydratase/isomerase echA1-21 AND 3-hydroxyacyl-CoA dehydrogenase fadB2-5 AND acetyl-CoA C-acetyltransferase fadA2-6	fadA6	552, 553, 554, 555, 556, 557, 558, 559, 560, 561, 562, 563, 564, 565, 566, 567, 568, 569, 570, 575, 576, 577, 578, 579, 580, 581, 582	beta oxidation of fatty acids	β oxidation of fatty acids	1.3.99.3 AND 4.2.1.17 AND 1.1.1.35 AND 2.3.1.16	0.107234	NE	0.383216	NE	TN	0.11972	NE	TN
BCG_3624	Rv3560c	acyl-CoA dehydrogenase fadE1-36 AND enoyl-CoA hydratase/isomerase echA1-21 AND 3-hydroxyacyl-CoA dehydrogenase fadB2-5 AND acetyl-CoA C-acetyltransferase fadA2-6	fadE30	552, 553, 554, 555, 556, 557, 558, 559, 560, 561, 562, 563, 564, 565, 566, 567, 568, 569, 570, 575, 576, 577, 578, 579, 580, 581, 582	beta oxidation of fatty acids	β oxidation of fatty acids	1.3.99.3 AND 4.2.1.17 AND 1.1.1.35 AND 2.3.1.16	0.107234	NE	0.614786	NE	TN	0.96122	NE	TN
BCG_3625	Rv3561	acyl-CoA dehydrogenase fadE1-36 AND enoyl-CoA hydratase/isomerase echA1-21 AND 3-hydroxyacyl-CoA dehydrogenase fadB2-5 AND acetyl-CoA C-acetyltransferase fadA2-11	fadD3	537, 538, 539, 540, 541, 542, 543, 544, 545, 546, 547, 548, 549, 550, 551	beta oxidation of fatty acids	β oxidation of fatty acids	1.3.99.3 AND 4.2.1.17 AND 1.1.1.35 AND 2.3.1.16	0.107234	NE	no-data	no-data	no-data	0.84779	NE	TN
BCG_3626	Rv3562	acyl-CoA dehydrogenase fadE1-36 AND enoyl-CoA hydratase/isomerase echA1-21 AND 3-hydroxyacyl-CoA dehydrogenase fadB2-5 AND acetyl-CoA C-acetyltransferase fadA2-6	fadE31	552, 553, 554, 555, 556, 557, 558, 559, 560, 561, 562, 563, 564, 565, 566, 567, 568, 569, 570, 575, 576, 577, 578, 579, 580, 581, 582	beta oxidation of fatty acids	β oxidation of fatty acids	1.3.99.3 AND 4.2.1.17 AND 1.1.1.35 AND 2.3.1.16	0.107234	NE	no-data	no-data	no-data	0.3158	NE	TN
BCG_3627	Rv3563	acyl-CoA dehydrogenase fadE1-36 AND enoyl-CoA hydratase/isomerase echA1-21 AND 3-hydroxyacyl-CoA dehydrogenase fadB2-5 AND acetyl-CoA C-acetyltransferase fadA2-6	fadE32	552, 553, 554, 555, 556, 557, 558, 559, 560, 561, 562, 563, 564, 565, 566, 567, 568, 569, 570, 575, 576, 577, 578, 579, 580, 581, 582	beta oxidation of fatty acids	β oxidation of fatty acids	1.3.99.3 AND 4.2.1.17 AND 1.1.1.35 AND 2.3.1.16	0.107234	NE	no-data	no-data	no-data	0.93607	NE	TN
BCG_3628	Rv3564	acyl-CoA dehydrogenase fadE1-36 AND enoyl-CoA hydratase/isomerase echA1-21 AND 3-hydroxyacyl-CoA dehydrogenase fadB2-5 AND acetyl-CoA C-acetyltransferase fadA2-6	fadE33	552, 553, 554, 555, 556, 557, 558, 559, 560, 561, 562, 563, 564, 565, 566, 567, 568, 569, 570, 575, 576, 577, 578, 579, 580, 581, 582	beta oxidation of fatty acids	β oxidation of fatty acids	1.3.99.3 AND 4.2.1.17 AND 1.1.1.35 AND 2.3.1.16	0.107234	NE	0.167023	E	FN	0.74854	NE	TN
BCG_3629	Rv3565	L-Tyrosine:2-oxoglutarate aminotransferase, L-Phenylalanine:2-oxoglutarate aminotransferase, aspartate transaminase aspB, aspC	aspB	190, 195, 225, 284, 286	Amino acid degradation, The aromatic family, Tyrosine	Amino acid metabolism	2.6.1.5 and 2.6.1.1	0.107234	NE	no-data	no-data	no-data	0.01897	E	FN
BCG_3632c	Rv3567c	oxygenase of 3-HSA 4-hydroxylase hsaA, reductase of 3-HSA 4-hydroxylase, hsaB	Rv3567c	937	cholesterol degradation	Other		0.107234	NE	0.47	NE	TN	0.433	NE	TN
BCG_3633c	Rv3568c	oxygenase of 3-HSA 4-hydroxylase hsaA, reductase of 3-HSA 4-hydroxylase, hsaB	bphC	937	cholesterol degradation	Other	EC:1.13.11.25	0.107234	NE	no-data	no-data	no-data	0.63505	NE	TN
BCG_3634c	Rv3569c	3,4-DHSA dioxygenase, hsaC	bphD	938	cholesterol degradation	Other	EC:3.7.1.-	0.107234	NE	no-data	no-data	no-data	0.9698	NE	TN
BCG_3635c	Rv3570c	MCP hydrolase, hsaD	-	937	cholesterol degradation	Other	EC:1.14.14.12	0.107234	NE	0.788954	NE	TN	0.14052	NE	TN
BCG_3636	Rv3571	oxygenase of 3-HSA 4-hydroxylase hsaA, reductase of 3-HSA 4-hydroxylase, hsaB	hmp	935	cholesterol degradation	Other	EC:1.14.1.-	0.107234	NE	0.423799	NE	TN	0.96122	NE	TN
BCG_3637	Rv3572	KSH, 3-ketosteroid 9a-hydroxylase comprised of KshA (oxygenase) and KshB (oxygenase-reductase)	Rv3572	935	cholesterol degradation	Other		0.107234	NE	0.65	NE	TN	0.895	NE	TN
BCG_3638c	Rv3573c	acyl-CoA dehydrogenase fadE1-36 AND enoyl-CoA hydratase/isomerase echA1-21 AND 3-hydroxyacyl-CoA dehydrogenase fadB2-5 AND acetyl-CoA C-acetyltransferase fadA2-6	fadE34	552, 553, 554, 555, 556, 557, 558, 559, 560, 561, 562, 563, 564, 565, 566, 567, 568, 569, 570, 575, 576, 577, 578, 579, 580, 581, 582	beta oxidation of fatty acids	β oxidation of fatty acids	1.3.99.3 AND 4.2.1.17 AND 1.1.1.35 AND 2.3.1.16	0.107234	NE	1.03477	NE	TN	0.77953	NE	TN
BCG_3646c	Rv3581c	2-C-methyl-D-erythritol 2,4-cyclodiphosphate synthase	ispF	682	Polyprenoids biosynthesis	Other	4.6.1.12	0	E	0.0705549	E	TP	0.04669	E	TP
BCG_3647c	Rv3582c	2-C-methyl-D-erythritol 4-phosphate cytidylyltransferase	ispD	680	Polyprenoids biosynthesis	Other	2.7.7.60	0	E	0.0376091	E	TP	0.00083	E	TP
BCG_3653c	Rv3588c	carbonic anhydrase	-	425	Cofactor biosynthesis, biotin biosynthesis	Cofactor biosynthesis	4.2.1.1	0.107234	NE	0.462494	NE	TN	0.01594	E	FN
BCG_3665c	Rv3601c	aspartate decarboxylase, panD	panD	176	Amino acid degradation, The aspartate family, Aspartate	Amino acid metabolism	4.1.1.11	0	E	no-data	no-data	no-data	0.01003	E	TP
BCG_3666c	Rv3602c	pantoate-beta-alanine ligase, panC	panC	392	Cofactor biosynthesis, Coenzyme-A biosynthesis	Cofactor biosynthesis	6.3.2.1	0	E	0.0695024	E	TP	0.00083	E	TP
BCG_3670c	Rv3606c	2-amino-4-hydroxy-6-hydroxymethyldihydropteridine diphosphokinase	folK	402	Cofactor biosynthesis, Folate biosynthesis	Cofactor biosynthesis	2.7.6.3	0.107234	NE	no-data	no-data	no-data	0.10518	NE	TN
BCG_3671c	Rv3607c	Probable folB, dihydroneopterin aldolase, dihydroneopterin aldolase	folB	401	Cofactor biosynthesis, Folate biosynthesis	Cofactor biosynthesis	4.1.2.25	0.107234	NE	0.0410001	E	FN	0.05426	NE	TN
BCG_3672c	Rv3608c	dihydropteroate synthase, DHPS or probable dihydropteroate synthase	folP1	405, 406	Cofactor biosynthesis, Folate biosynthesis	Cofactor biosynthesis	2.5.1.15	0.107234	NE	0.062773	E	FN	0.01791	E	FN
BCG_3673c	Rv3609c	GTP cyclohydrolase I	folE	399	Cofactor biosynthesis, Folate biosynthesis	Cofactor biosynthesis	3.5.4.16	0.107234	NE	0.108025	E	FN	0.00153	E	FN
BCG_3682c	Rv3624c	Hypoxanthine-guanine phosphoribosyltransferase	hpt	334, 335	Nucleotide biosynthesis, Purines	Nucleotide biosynthesis	2.4.2.8	0.107234	NE	no-data	no-data	no-data	0.00606	E	FN
BCG_3686	Rv3628	Inorganic pyrophosphatase	ppa	130	Energy metabolism	Other	3.6.1.1	0	E	no-data	no-data	no-data	0.01003	E	TP
BCG_3692c	Rv3634c	UDP-glucose 4-epimerase galE1, galE2, galE3, dTDP-glucose-4,6-dehydratase rmlB/rmlB2/rmlB3/epiB	galE1	20, 708	C6 Compounds, Galactose	Carbohydrate metabolism (excluding central metabolism)	5.1.3.2 and 4.2.1.46	0.107234	NE	0.0895276	E	FN	1e-05	E	FN
BCG_3725	Rv3667	acetyl-CoA synthetase	acs	67, 81	Pyruvate metabolism	Other	6.2.1.1	0.107234	NE	0.61955	NE	TN	0.27298	NE	TN
BCG_3755c	Rv3696c	Glycerol kinase glpK	glpK	1	C3 compounds, Glycerol metabolism	Carbon metabolism (excluding central carbon metabolism)	2.7.1.30	0.0801563	NE	0.704637	NE	TN	0	E	FN
BCG_3768c	Rv3708c	aspartate-semialdehyde dehydrogenase asd	asd	228	Amino acid biosynthesis, The aspartate family, Threonine	Amino acid metabolism	1.2.1.11	0	E	0.0465209	E	TP	0.00505	E	TP
BCG_3769c	Rv3709c	aspartate kinase ask	ask	227	Amino acid biosynthesis, The aspartate family, Threonine	Amino acid metabolism	2.7.2.4	0	E	0.0479875	E	TP	0.00024	E	TP
BCG_3770	Rv3710	2-isopropylmalate synthase leuA	leuA	220	Amino acid biosynthesis, Branched chain amino acids, Leucine	Amino acid metabolism	2.3.3.13	0	E	0.03969	E	TP	0	E	TP
BCG_3794c	Rv3734c	triacylglycerol synthase	-	TAG	triglyceride synthesis	Lipid biosynthesis	2.3.1.75	0.107234	NE	2.06854	NE	TN	0.99135	NE	TN
BCG_3799c	Rv3740c	triacylglycerol synthase	-	TAG	triglyceride synthesis	Lipid biosynthesis	2.3.1.75	0.107234	NE	1.04088	NE	TN	0.99326	NE	TN
BCG_3813	Rv3754	prephenate dehydrogenase tyrA	tyrA	285	Amino acid biosynthesis, The aromatic family, Tyrosine and phenylalanine	Amino acid metabolism	1.3.1.12	0	E	no-data	no-data	no-data	0.00045	E	TP
BCG_3820c	Rv3761c	acyl-CoA dehydrogenase fadE1-36 AND enoyl-CoA hydratase/isomerase echA1-21 AND 3-hydroxyacyl-CoA dehydrogenase fadB2-5 AND acetyl-CoA C-acetyltransferase fadA2-6	fadE36	552, 553, 554, 555, 556, 557, 558, 559, 560, 561, 562, 563, 564, 565, 566, 567, 568, 569, 570, 575, 576, 577, 578, 579, 580, 581, 582	beta oxidation of fatty acids	β oxidation of fatty acids	1.3.99.3 AND 4.2.1.17 AND 1.1.1.35 AND 2.3.1.16	0.107234	NE	1.24096	NE	TN	0.65733	NE	TN
BCG_3833	Rv3772	histidinol-phosphate transaminase hisC, hisC2	hisC2	267	Amino acid biosynthesis, The histidine family, Histidine	Amino acid metabolism	2.6.1.9	0.107234	NE	2.82323	NE	TN	0.67826	NE	TN
BCG_3836	Rv3774	acyl-CoA dehydrogenase fadE1-36 AND enoyl-CoA hydratase/isomerase echA1-21 AND 3-hydroxyacyl-CoA dehydrogenase fadB2-5 AND acetyl-CoA C-acetyltransferase fadA2-6	echA21	154, 552, 553, 554, 555, 556, 557, 558, 559, 560, 561, 562, 563, 564, 565, 566, 567, 568, 569, 570, 575, 576, 577, 578, 579, 580, 581, 582	beta oxidation of fatty acids	β oxidation of fatty acids	1.3.99.3 AND 4.2.1.17 AND 1.1.1.35 AND 2.3.1.16	0.107234	NE	1.72999	NE	TN	0.9698	NE	TN
BCG_3837	Rv3775	Probable Phospholipases	lipE	590	Inositol phosphate metabolism, Glycerophospholipid metabolism	Lipid biosynthesis	3.1.4.3	0.107234	NE	2.68897	NE	TN	0.99752	NE	TN
BCG_3846	Rv3784	dTDP-glucose-4,6-dehydratase rmlB/rmlB2/rmlB3/epiB	-	708	synthesis of arabinogalactan (incomplete), dTDP-Rhamnose Synthesis	Cell wall syntheisis	4.2.1.46	0.107234	NE	3.52465	NE	TN	0.97373	NE	TN
BCG_3852	Rv3790	decaprenylphosphoryl-beta-D-ribose epimerase	-	697	synthesis of arabinogalactan (incomplete)	Cell wall syntheisis	1.-.-.-	0	E	0.0389252	E	TP	0	E	TP
BCG_3853	Rv3791	decaprenylphosphoryl-beta-D-ribose epimerase	-	697	synthesis of arabinogalactan (incomplete)	Cell wall syntheisis	1.-.-.-	0	E	0.0955405	E	TP	0.00153	E	TP
BCG_3854	Rv3792	arabinosyl transferases aftA	-	705	synthesis of arabinogalactan (incomplete), ArabinofuranoseDPP Synthesis	Cell wall syntheisis	2.4.2.34	0	E	0.0376207	E	TP	0	E	TP
BCG_3855	Rv3793	arabinosyl transferases embC	embC	LAM	Macromolecule biosynthesis	Cell wall syntheisis	2.4.2.34	0	E	0.0317282	E	TP	0	E	TP
BCG_3856	Rv3794	arabinosyl transferases embA and embB	embA	706	synthesis of arabinogalactan (incomplete), ArabinofuranoseDPP Synthesis	Cell wall syntheisis	2.4.2.34	0	E	no-data	no-data	no-data	0	E	TP
BCG_3857	Rv3795	arabinosyl transferases embA and embB	embB	706	synthesis of arabinogalactan (incomplete), ArabinofuranoseDPP Synthesis	Cell wall syntheisis	2.4.2.34	0	E	0.0646101	E	TP	0	E	TP
BCG_3859	Rv3797	acyl-CoA dehydrogenase fadE1-36 AND enoyl-CoA hydratase/isomerase echA1-21 AND 3-hydroxyacyl-CoA dehydrogenase fadB2-5 AND acetyl-CoA C-acetyltransferase fadA2-6	fadE35	552, 553, 554, 555, 556, 557, 558, 559, 560, 561, 562, 563, 564, 565, 566, 567, 568, 569, 570, 575, 576, 577, 578, 579, 580, 581, 582	beta oxidation of fatty acids	β oxidation of fatty acids	1.3.99.3 AND 4.2.1.17 AND 1.1.1.35 AND 2.3.1.16	0.107234	NE	1.77696	NE	TN	0.96172	NE	TN
BCG_3861c	Rv3799c	acetyl-CoA/propionyl-CoA carboxylase carboxytransferase subunit: 6 paralogues in Mtb: accD1, accD2, accD3, accD4, accD5, accD6, methylmalonyl-CoA decarboxylase	accD4	156, 163, 495, 508	Amino acid degradation, Branched chain amino acids, Isoleucine	Amino acid metabolism	6.4.1.4 and 6.4.1.3 and 6.4.1.2 and 4.1.1.41	0	E	0.155941	E	TP	7e-05	E	TP
BCG_3862c	Rv3800c	Claisen-type condensation by polyketide synthase, pks13	pks13	638	lipid biosynthesis, Synthesis of mycolic acids, MYCOLIC ACID CONDENSATION	Lipid biosynthesis	-	0	E	0.0481466	E	TP	0	E	TP
BCG_3863c	Rv3801c	acyl-CoA dehydrogenase fadE1-36 AND enoyl-CoA hydratase/isomerase echA1-21 AND 3-hydroxyacyl-CoA dehydrogenase fadB2-5 AND acetyl-CoA C-acetyltransferase fadA2-11	fadD32	537, 538, 539, 540, 541, 542, 543, 544, 545, 546, 547, 548, 549, 550, 551, 637	beta oxidation of fatty acids	β oxidation of fatty acids	1.3.99.3 AND 4.2.1.17 AND 1.1.1.35 AND 2.3.1.16	0	E	0.017371	E	TP	0	E	TP
BCG_3864c	Rv3802c	mycoyltransferase I. activity not demonstrated	-	640	lipid biosynthesis, Synthesis of mycolic acids, MYCOLIC ACID CONDENSATION	Lipid biosynthesis	-	0	E	0.0800594	E	TP	0	E	TP
BCG_3866c	Rv3804c	mycoyltransferase Antigen-85 complex (FbpA, FbpB, FbpC), mycoyltransferase Antigen-85 complex (FbpA, FbpB, FbpC)	fbpA	MAPC, TDM	lipid biosynthesis, Synthesis of mycolic acids, MYCOLIC ACID CONDENSATION	Lipid biosynthesis	2.3.1.-	0	E	0.364475	NE	FP	0.02968	E	TP
BCG_3868c	Rv3806c	phosphoribose:decaprenyl ribosyltransferase	-	695	synthesis of arabinogalactan (incomplete)	Cell wall syntheisis	-	0	E	0.0305217	E	TP	2e-05	E	TP
BCG_3870c	Rv3808c	bifunctional UDP-galactofuranosyl transferase glfT	glfT	702	synthesis of arabinogalactan (incomplete)	Cell wall syntheisis	2.-.-.-	0	E	0.0296708	E	TP	0	E	TP
BCG_3871c	Rv3809c	UDP-galactopyranose mutase glf	glf	711	synthesis of arabinogalactan (incomplete), UDP-Galactofuranose Synthesis	Cell wall syntheisis	5.4.99.9	0	E	0.336388	NE	FP	0	E	TP
BCG_3880	Rv3818	UDP-N-acetylmuramic acid hydroxylase, namH	-	722	Peptidoglycan Synthesis, NAG and NAM biosynthesis	Cell wall syntheisis	-	0	E	0.650677	NE	FP	0.01607	E	TP
BCG_3888c	Rv3825c	polyketide synthase, pks2	pks2	647	lipid biosynthesis, synthesis of branched fatty acids, synthesis of pthioceranic acid	Lipid biosynthesis	-	0.107234	NE	0.371341	NE	TN	1	NE	TN
BCG_3889	Rv3826c	acyl-CoA dehydrogenase fadE1-36 AND enoyl-CoA hydratase/isomerase echA1-21 AND 3-hydroxyacyl-CoA dehydrogenase fadB2-5 AND acetyl-CoA C-acetyltransferase fadA2-11	fadD23	537, 538, 539, 540, 541, 542, 543, 544, 545, 546, 547, 548, 549, 550, 551	beta oxidation of fatty acids	β oxidation of fatty acids	1.3.99.3 AND 4.2.1.17 AND 1.1.1.35 AND 2.3.1.16	0.107234	NE	no-data	no-data	no-data	0.18457	NE	TN
BCG_3901c	Rv3838c	prephenate dehydratase	pheA	283	Amino acid biosynthesis, The aromatic family, Tyrosine and phenylalanine	Amino acid metabolism	4.2.1.51	0	E	no-data	no-data	no-data	0.00166	E	TP
BCG_3921c	Rv3858c	glutamate synthase gltB, gltD	gltD	197	Amino acid biosynthesis, Glutamate family, Glutamate/glutamine	Amino acid metabolism	1.4.1.13	0.107234	NE	0.0407491	E	FN	0.00024	E	FN
BCG_3922	Rv3859c	glutamate synthase gltB, gltD	gltB	197	Amino acid biosynthesis, Glutamate family, Glutamate/glutamine	Amino acid metabolism	1.4.1.13	0.107234	NE	0.0275311	E	FN	0	E	FN
