# Supplementary material for: Systems-Based Approaches to Probing Metabolic Variation within the Mycobacterium tuberculosis Complex
Source: PLoS One. 2013 Sep 17;8(9):e75913. doi: 10.1371/journal.pone.0075913 (PMC3783153; doi:10.1371/journal.pone.0075913)
Supplement: Table S10 — M. bovis BCG carbon utilisation. (XLSX) [file pone.0075913.s015.xlsx]

## Sheet: GSMN-BCG Phenotype data
M.bovis BCG Pasteur carbon source utilisation
Growth	+
No Growth	-
Not tested	NT
Carbon sources	Confidence level	Biolog	GSMN-BCG	Roisin's agar media
L-arabinose	High	-	-	NT
N-acetyl-glucosamine	Medium	-	-	NT
D-saccharic Acid	High	-	-	NT
succinate	High	-	+	+
D-galactose	High	-	+	-
L-aspartic acid	High	-	+	+
L-proline	High	-	+	+
D-alanine	High	-	-	NT
D-trehalose	High	+	+	+
D-mannose	High	-	+	+
dulictol	High	-	-	NT
D-serine	Medium	-	-	-
D-sorbitol	High	-	-	NT
glycerol	High	+	+	+
L-fucose	High	-	-	NT
D-glucuronic acid	High	-	-	NT
D-gluconic acid	High	-	-	NT
D,L -α-glycerol phosphate	High	-	-	NT
D xylose	High	-	-	-
L-lactate	High	+	+	NT
formic acid	High	-	-	NT
D-mannitol	High	-	-	NT
L-glutamate	Medium	+	+	+
D-glucose-6-phosphate	Low	+	+	NT
D-galactonic acid-γ-lactone	High	-	-	NT
D,L malic acid	High	-	+	+
D-ribose	High	-	+	-
Tween 20	Medium	+	+	NT
L-Rhamnose	High	-	-	-
D-fructose	Medium	-	+	-
acetate	High	+	+	+
D-glucose	High	-	+	+
maltose	High	-	+	-
D-melibiose	High	-	-	NT
thymidine	High	-	-	NT
L-asparagine	Low	+	+	+
D-aspartic acid	High	-	-	NT
D-glucosaminic acid	High	-	-	NT
1,2-propanediol	High	-	-	NT
Tween 40	High	+	+	NT
2-oxoglutarate	Medium	-	+	+
α-keto-butyric acid	Low	-	-	NT
α-methyl-D-glucoside	High	-	-	NT
D-lactose	High	-	-	-
lactulose	High	-	-	NT
sucrose	High	-	+	-
uridine	High	-	-	NT
L-glutamine	High	-	+	+
M-tartaric acid	High	-	-	NT
D-glucose-1-phosphate	High	-	+	NT
D-fructose-6-phosphate	High	-	+	NT
Tween 80	Medium	+	+	+
α-hydroxy glutaric acid-y-lactone	High	-	-	NT
α-hydroxy butyric acid	High	-	-	NT
β-methyl-D-glucoside	High	-	-	NT
adonitol	High	-	-	NT
maltotriose	High	-	-	NT
2-deoxy adenosine	High	-	+	NT
adenosine	Low	+	+	NT
glycyl-L-glutamic acid	Medium	-	-	NT
citrate	Low	+	+	+
M-inositol	High	-	-	NT
D-threonine	High	-	-	NT
fumaric acid	High	-	+	+
bromo succinic acid	Medium	-	-	NT
propanoate	High	+	+	+
mucic acid	High	-	-	NT
glycolic acid	High	-	-	NT
gyloxylic acid	Medium	-	+	NT
D cellobiose	High	-	-	NT
inosine	High	-	+	NT
glycyl-L-glutamic acid	High	-	-	NT
tricarboxylic acid	High	-	-	NT
L-serine	High	-	+	+
L-threonine	High	-	+	-
L-alanine	High	-	-	-
L-alanyl glycine	High	-	-	NT
acetoacetic Acid	High	+	-	NT
N-acetyl-β-D-mannosamine	High	-	-	NT
mono methyl succinate	High	+	-	NT
methyl pyruvate	High	+	-	NT
D-malic acid	Low	+	-	+
L-malic acid	Medium	+	+	NT
glycyl L proline	High	-	-	NT
p-hydroxy phenyl acetic acid	High	-	-	NT
M-hydroxy phenyl acetic acid	High	-	-	NT
tyramine	High	-	-	NT
D pscicose	High	-	-	NT
L-lyxose	High	-	-	NT
glucuronamide	High	-	-	NT
pyruvate	High	+	+	NT
L galactonic acid - y-lactone	High	-	-	NT
D galacturonic acid	High	-	-	NT
phenylethyl amine	High	-	-	NT
2 aminoethanol	High	-	-	NT
chondroitin sulfate C	High	-	-	NT
α-cyclodextrin	High	-	-	NT
β-cyclodextrin	High	-	-	NT
γ-cyclodextrin	High	-	-	NT
dextrin	High	-	-	NT
gelatin	High	-	-	NT
glycogen	High	-	-	NT
inulin	High	-	-	NT
laminarin	High	-	-	NT
mannan	High	-	-	NT
pectin	High	-	-	NT
N-acetyl-D-galactosamine	High	-	-	NT
N-acetyl-neuraminic Acid	High	-	-	NT
β-D-allose	High	-	-	NT
amygdalin	High	-	-	NT
D-arabinose	High	-	-	NT
D-arabitol	High	-	-	NT
L-arabitol	High	-	-	NT
arbutin	High	-	-	NT
2-deoxy-D ribose	High	-	-	NT
I-erythritol	High	-	-	NT
D-fucose	High	-	-	NT
3-0-β-D-galactopyranosyl-D arabinose	High	-	-	NT
gentiobiose	High	-	-	NT
L-glucose	High	-	-	NT
lactitol	High	-	-	NT
D-melezitose	High	-	-	NT
maltitol	High	-	-	NT
a-methyl-D glucoside	High	-	-	NT
β-methyl-D galactoside	High	-	-	NT
3-methyl glucose	High	-	-	NT
β-methyl-D glucuronic acid	High	-	-	NT
α-methyl-D mannoside	High	-	-	NT
β-methyl-D xyloside	High	-	-	NT
palatinose	High	-	-	NT
D-raffinose	High	-	-	-
salicin	High	-	-	NT
sedoheptulosan	High	-	-	NT
L-sorbose	High	-	-	NT
stachyose	High	-	-	NT
D-tagatose	High	-	-	NT
turanose	High	-	-	NT
xylitol	High	-	-	NT
N-acetyl-D glucosaminitol	High	-	-	NT
γ-amino butyric acid	High	-	-	NT
δ-amino valeric acid	High	-	-	NT
butyric Acid	Low	+	-	NT
capric Acid	High	-	-	NT
caproic Acid	High	+	+	NT
citraconic Acid	High	-	-	NT
citramalic Acid	High	-	-	NT
D-glucosamine	High	-	-	NT
2-hydroxy benzoic acid	High	-	-	NT
4-hydroxy benzoic acid	High	-	-	NT
β-hydroxy butyric acid	High	-	-	NT
γ-hydroxy butyric acid	High	-	-	NT
α-keto-valeric acid	High	-	-	NT
itaconic acid	High	-	-	NT
5-keto-D gluconic acid	High	-	-	NT
D-lactic acid methyl ester	High	-	-	NT
malonic acid	High	-	-	NT
melibionic acid	High	-	-	NT
oxalic acid	High	-	-	NT
oxalomalic acid	Medium	+	-	NT
quinic acid	High	-	-	NT
D-ribono-1,4-lactone	High	-	-	NT
sebacic acid	High	-	-	NT
sorbic acid	High	-	-	NT
succinamic acid	High	-	-	NT
D D-tartaric acid	High	-	-	NT
L-tartaric acid	High	-	-	NT
acetamide	High	-	-	NT
L-alaninamide	High	-	-	NT
N-acetyl-L glutamic acid	Medium	-	-	NT
L-arginine	High	-	-	+
glycine	Medium	-	+	+
L-histidine	Medium	-	-	-
L-homoserine	High	-	+	NT
hydroxy-L proline	High	-	-	NT
L-isoleucine	High	-	+	+
L-leucine	High	-	-	-
L-lysine	High	-	-	-
L-methionine	High	-	-	-
L-ornithine	High	-	-	NT
L-phenylalanine	High	-	-	-
L-pyroglutamic acid	High	-	-	NT
L-valine	High	-	+	-
D,L-carnitine	High	-	-	NT
sec-butylamine	High	-	-	NT
D.L-octopamine	High	-	-	NT
putrescine	High	-	-	NT
dihydroxy acetone	High	-	-	NT
2,3-butanediol	High	-	-	NT
1 2,3-butanone	High	-	-	NT
3-hydroxy 2-butanone	High	-	-	NT
