# Supplementary material for: Systems-Based Approaches to Probing Metabolic Variation within the Mycobacterium tuberculosis Complex
Source: PLoS One. 2013 Sep 17;8(9):e75913. doi: 10.1371/journal.pone.0075913 (PMC3783153; doi:10.1371/journal.pone.0075913)
Supplement: Table S12 — M. bovis nitrogen utilisation. (XLSX) [file pone.0075913.s017.xlsx]

## Sheet: GSMN-MB Phenotype data
M.bovis AF2122/97 nitrogen source utilisation
Growth	+
No growth	-
Not tested	NT
Nitrogen sources	Confidence level	Biolog	GSMN-MB	Roisin's agar media
Ammonia	High	-	+	+
Nitrite	High	-	-	NT
Nitrate	High	-	-	NT
Urea	High	-	+	-
Biuret	High	-	-	NT
L-Alanine	High	-	-	-
L-Arginine	High	-	+	+
L-Asparagine	Low	+	+	+
L-Aspartic Acid	High	-	+	+
L-Cysteine	High	+	-	+
L-Glutamic Acid	High	+	+	+
L-Glutamine	Low	+	+	+
Glycine	Medium	-	+	-
L-Histidine	High	-	-	-
L-Isoleucine	High	-	+	+
L-Leucine	High	-	-	-
L-Lysine	High	-	-	-
L-Methionine	High	-	-	-
L-Phenylalanine	High	-	-	-
L-Proline	Medium	-	+	-
L-Serine	Low	+	+	+
L-Threonine	High	-	+	-
L-Tryptophan	Medium	-	-	-
L-Tyrosine	High	-	-	-
L-Valine	High	-	+	-
D-Alanine	High	-	-	NT
D-Asparagine	High	-	-	NT
D-Aspartic Acid	High	-	-	NT
D-Glutamic Acid	High	-	-	NT
D-Lysine	High	-	-	NT
D-Serine	High	+	-	-
D-Valine	High	-	-	NT
L-Citrulline	High	-	-	NT
L-Homoserine	High	-	+	NT
L-Ornithine	High	+	-	NT
N-Acetyl-D,Lglutamic Acid	Medium	-	-	NT
N-Phthaloyl-Lglutamic Acid	High	-	-	NT
L-Pyroglutamic Acid	High	-	-	NT
Hyroxylamine	High	-	-	NT
Methylamine	High	-	-	NT
N-Amylamine	High	-	-	NT
N-Butylamine	High	-	-	NT
Ethylamine	High	-	-	NT
Ethanolamine	High	-	-	NT
Ethylenediamine	High	-	-	NT
Putrescine	High	-	-	NT
Agmatine	High	-	-	NT
Histamine	High	-	-	NT
β-Phenylethylamine	High	-	-	NT
Tyramine	High	-	-	NT
Acetamide	High	-	-	NT
Formamide	High	-	-	NT
Glucuronamide	High	-	-	NT
D,L-Lactamide	High	-	-	NT
D-Glucosamine	Low	+	-	NT
D-Galactosamine	Low	+	-	NT
D-Mannosamine	High	-	-	NT
N-Acetyl-DGlucosamine	High	-	-	NT
N-Acetyl-DGalactosamine	High	-	-	NT
N-Acetyl-DMannosamine	High	-	-	NT
Adenine	High	-	+	NT
Adenosine	High	-	+	NT
Cytidine	High	-	-	NT
Cytosine	High	-	-	NT
Guanine	High	-	-	NT
Guanosine	High	-	-	NT
Thymine	High	-	-	NT
Thymidine	High	-	-	NT
Uracil	High	-	-	NT
Uridine	High	-	-	NT
Inosine	High	-	-	NT
Xanthine	High	-	-	NT
Xanthosine	High	-	-	NT
Uric Acid	High	-	-	NT
Alloxan	High	-	-	NT
Allantoin	Low	+	-	NT
Parabanic Acid	High	-	-	NT
D,L-α-Amino-N butyric Acid	High	-	-	NT
γ-Amino-N butyric Acid	High	-	-	NT
ε-Amino-N Caproic Acid	High	-	-	NT
D,L-α-Amino-Caprylic Acid	High	-	-	NT
δ-Amino-N Valeric Acid	High	-	-	NT
α-Amino-N Valeric Acid	High	-	-	NT
Ala-Asp	High	-	-	NT
Ala-Gln	High	-	-	NT
Ala-Glu	High	-	-	NT
Ala-Gly	High	-	-	NT
Ala-His	High	-	-	NT
Ala-Leu	High	-	-	NT
Ala-Thr	High	-	-	NT
Gly-Asn	High	-	-	NT
Gly-Gln	High	-	-	NT
Gly-Glu	High	-	-	NT
Gly-Met	High	-	-	NT
Met-Ala	High	-	-	NT
